# Supplementary material for: Transcriptome Analysis Reveals the Role of Cellular Calcium Disorder in Varicella Zoster Virus-Induced Post-Herpetic Neuralgia
Source: Front Mol Neurosci. 2021 May 17;14:665931. doi: 10.3389/fnmol.2021.665931 (PMC8166323; doi:10.3389/fnmol.2021.665931)
Supplement: Supplementary file 3 [file Table_3.XLSX]

## Sheet: SH_SY5Y_Mock vs 48h
	Row.names	baseMean	log2FoldChange	lfcSE	stat	pvalue	padj	SH_SY5Y_mock_1	SH_SY5Y_mock_2	SH_SY5Y_mock_3	SH_SY5Y_48h_1	SH_SY5Y_48h_2	SH_SY5Y_48h_3
1	ASNS	3345.53	2.22771	0.0548921	40.5835	0	0	1190.74	1132.42	1208.84	5549.04	5437.14	5555.01
2	C11orf96	2258.73	3.90302	0.0770989	50.6235	0	0	263.289	293.995	292.11	3989.77	4405.96	4307.23
3	CD44	5077.67	2.03303	0.051085	39.7969	0	0	2013.27	1968.87	2000.23	8420.64	8163.69	7899.35
4	CEBPB	3639.58	2.41172	0.0622079	38.7687	0	0	1101.65	1130.44	1223.34	5850.74	6498.24	6033.05
5	DDIT3	1576.42	2.58471	0.0682408	37.8764	0	0	459.27	439.507	452.667	2713.28	2725.55	2668.24
6	DDIT4	6305.89	2.17849	0.0511917	42.5556	0	0	2276.55	2190.61	2379.35	10335.4	10553.2	10100.3
7	DUSP1	9001.86	1.84593	0.0466896	39.5362	0	0	3819.66	3902.11	4033.6	13797.4	14241.1	14217.3
8	EMP1	2121.63	2.59634	0.0644528	40.2828	0	0	577.057	633.524	595.614	3663.18	3547.3	3713.1
9	ETV4	4145.71	7.33857	0.128651	57.0425	0	0	53.4496	44.5447	54.9001	8258.34	8566.58	7896.43
10	ETV5	2125.93	5.39784	0.102371	52.7281	0	0	92.052	90.0792	113.944	4171.99	4303.24	3984.31
11	GDF15	3671.01	3.48547	0.0713604	48.8432	0	0	631.497	541.465	632.905	6233.09	7003.86	6983.28
12	IGFBP5	4318.74	-3.8029	0.0599986	-63.3832	0	0	8142.15	8148.7	7889.04	550.623	605.345	576.574
13	JUNB	3340.09	2.4738	0.0557503	44.3729	0	0	997.725	1009.68	1050.35	5576.92	5620.64	5785.25
14	LDHA	34074.4	2.03904	0.0456858	44.6319	0	0	12919	13326.8	13766.5	54244.8	53604.5	56585.2
15	NDRG1	11172.4	1.87031	0.044678	41.8619	0	0	4712.47	4748.46	4936.86	17646.8	17418.4	17571.4
16	NYNRIN	4519.09	-2.07986	0.0549	-37.8846	0	0	7421.57	7025.19	7480.91	1808.19	1715.31	1663.38
17	PHLDA2	1510.39	2.98534	0.0781504	38.2	0	0	355.341	310.823	350.118	2567.91	2837.24	2640.92
18	PPP1R15A	7025.14	2.33079	0.0555856	41.9315	0	0	2332.97	2239.11	2417.68	11911.6	12214.6	11034.9
19	SLC2A3	18007.9	2.64069	0.0446397	59.1557	0	0	4821.35	5128.58	4981.41	31171.4	30809.8	31135
20	SLC7A5	13687.7	3.03445	0.0513937	59.0433	0	0	2998.12	2846.9	3088.91	24691.4	25157.2	23343.9
21	SLIT2	10118.2	-2.00523	0.0511794	-39.1804	0	0	16209.1	16990.3	15403.1	4110.25	3937.24	4059.43
22	SPRY4	1054.1	5.76072	0.15055	38.2645	0	0	35.633	41.575	37.2906	2164.65	2049.4	1996.06
23	STC1	1527.88	3.51944	0.0899383	39.1317	0	0	250.421	289.045	194.74	2828.79	2759.46	2844.82
24	STC2	1499.57	3.08023	0.0738849	41.6896	0	0	322.677	317.752	310.755	2694.37	2727.54	2624.34
25	TGFB1	16475.3	2.22193	0.0471402	47.1346	0	0	5955.67	5529.48	5964.43	27071.1	27489.9	26841.4
26	TNFRSF12A	2911.12	2.94796	0.0596117	49.4527	0	0	661.191	657.281	685.733	5044.22	5203.78	5214.53
27	TRIB3	5371.12	3.50051	0.0588263	59.5059	0	0	863.111	848.328	905.333	9820.6	10341.7	9447.62
28	UPP1	2493.6	2.8962	0.0665455	43.5221	0	0	563.2	568.192	641.192	4310.39	4566.52	4312.11
29	VEGFA	2556.48	2.19696	0.0590693	37.193	8.85779e-303	5.09751e-300	892.805	891.883	962.305	4242.68	4221.46	4127.72
30	BHLHE40	3679.9	2.02146	0.0550346	36.7307	2.3602e-295	1.31298e-292	1494.61	1443.25	1425.33	6092.69	5938.77	5684.76
31	GADD45B	2544.08	2.24877	0.0614814	36.5764	6.77861e-293	3.6493e-290	838.366	899.802	915.692	4036.57	4289.28	4284.79
32	GARS	5655.55	1.77824	0.048802	36.4379	1.06806e-290	5.57025e-288	2519.06	2568.74	2572.02	8986.2	8741.11	8546.17
33	PSAT1	3091.09	2.0059	0.0555229	36.1274	8.41027e-286	4.25331e-283	1235.28	1263.09	1198.48	4959.59	4826.81	5063.31
34	EMILIN2	3057.45	2.00782	0.0558317	35.9619	3.29277e-283	1.61627e-280	1194.7	1215.57	1243.02	4962.57	4992.35	4736.49
35	HK2	1634.49	2.63581	0.0746492	35.3094	4.21727e-273	2.01092e-270	479.066	468.214	411.233	2787.96	2695.63	2964.82
36	ERRFI1	3120.09	1.9727	0.0561722	35.1187	3.49595e-270	1.62066e-267	1287.74	1295.75	1217.12	5003.4	4830.8	5085.75
37	SLC7A1	8708.93	1.66044	0.0478305	34.7152	4.65374e-264	2.09909e-261	4307.64	4102.07	4147.55	13548.5	13328.6	12819.3
38	GAL	3354.51	2.16736	0.0625649	34.6418	5.93972e-263	2.60863e-260	1217.46	1125.5	1322.78	5468.39	5653.55	5339.41
39	SLC7A11	1004.95	3.10455	0.0918035	33.8173	1.09856e-250	4.70099e-248	192.022	222.723	213.385	1865.94	1663.45	1872.16
40	INPP5D	755.02	-3.70127	0.11004	-33.6357	5.04104e-248	2.10325e-245	1393.65	1360.1	1453.3	93.5959	99.7274	129.754
41	SLC1A5	16771.2	1.68088	0.0505307	33.2644	1.26233e-242	5.13828e-240	7860.05	7643.86	8420.43	25941	26113.6	24648.3
42	COL3A1	1058	-2.86561	0.0865486	-33.1098	2.1483e-240	8.45032e-238	1922.2	1779.81	1880.07	286.762	231.368	247.8
43	DDX17	8576	-1.54857	0.0467712	-33.1094	2.17726e-240	8.45032e-238	12883.3	12903.1	12560.7	4436.84	4217.47	4454.55
44	NREP	1848.46	-2.27573	0.0697499	-32.6269	1.70197e-233	6.45551e-231	3066.42	3051.8	3074.4	563.567	671.165	663.401
45	MTHFD1L	1995.47	1.97034	0.0608884	32.3598	1.00896e-229	3.74191e-227	797.784	832.49	803.82	3110.57	3230.17	3197.98
46	AKNA	3096.85	1.78463	0.0556989	32.0408	2.95293e-225	1.07134e-222	1409.48	1370.99	1399.43	4885.9	4908.58	4606.74
47	BMP2	2097.15	2.00692	0.062756	31.9798	2.08283e-224	7.39583e-222	819.56	879.015	807.964	3282.83	3477.49	3316.03
48	HERPUD1	2690.3	1.76973	0.0554936	31.8908	3.58459e-223	1.24632e-220	1236.27	1200.73	1223.34	4175.97	4231.43	4074.06
49	METTL7A	1973.66	-2.05055	0.0649952	-31.5493	1.83397e-218	6.24634e-216	3201.03	3081.5	3256.71	821.453	731.999	749.253
50	BMF	1845.36	-2.02114	0.0641671	-31.4981	9.21056e-218	3.0743e-215	3050.58	2828.09	3005	736.819	718.037	733.644
51	PHLDA1	854.061	2.81188	0.0893185	31.4814	1.55913e-217	5.10203e-215	210.829	225.693	201.991	1556.28	1474.97	1454.61
52	IL11	566.565	4.03133	0.12882	31.2941	5.60532e-215	1.79898e-212	59.3884	71.2715	65.2586	1047.48	1074.06	1081.93
53	YARS	8397.52	1.78929	0.0574209	31.1609	3.60746e-213	1.13594e-210	3779.08	3492.3	4035.67	13398.1	13166	12513.9
54	VARS	5783.63	1.66944	0.0538512	31.0011	5.21366e-211	1.61131e-208	2715.04	2666.74	2919.03	8853.77	9075.19	8472.03
55	CDC42EP1	4913.47	1.61786	0.0522562	30.9601	1.85612e-210	5.63214e-208	2463.63	2320.28	2461.18	7444.85	7624.16	7166.69
56	HSPA5	19724	1.2803	0.0416602	30.732	2.12465e-207	6.33185e-205	11339.2	11468.8	11706.1	28175.3	27730.2	27924.3
57	LOX	1494.69	2.06968	0.0676855	30.5778	2.41393e-205	7.06774e-203	563.2	577.101	585.256	2362.8	2373.51	2506.29
58	DEPP1	10413.2	-1.67166	0.0547666	-30.5234	1.27412e-204	3.66616e-202	16141.8	14859.1	16551.9	5040.24	5143.94	4742.34
59	FOSL1	1166.86	2.33875	0.0777249	30.0902	6.51442e-199	1.8427e-196	361.279	405.851	388.444	1969.5	2023.47	1852.65
60	MARS	7071.12	1.61481	0.0538709	29.9756	2.04265e-197	5.68164e-195	3522.72	3244.83	3676.23	10669.9	10826.4	10486.6
61	SOCS3	1027.36	2.47571	0.0830213	29.8202	2.14034e-195	5.85577e-193	311.789	279.147	349.082	1742.48	1740.24	1741.43
62	SLC2A1	3016.72	1.73487	0.0586266	29.5918	1.90523e-192	5.12846e-190	1356.03	1348.22	1478.16	4537.41	4809.85	4570.64
63	SRRM2	32135.6	-1.19782	0.0405446	-29.5432	8.02364e-192	2.1255e-189	44965.9	44740.7	44570.6	19757.7	19604.4	19174.3
64	EIF4EBP1	4112.44	1.69029	0.0578057	29.241	5.84987e-188	1.52545e-185	1949.92	1819.4	2068.59	6119.58	6476.3	6240.85
65	CEL	533.624	-3.49238	0.119453	-29.2365	6.66037e-188	1.71008e-185	989.806	981.962	968.52	98.5744	87.7601	75.1205
66	IER2	4310.52	1.55187	0.0534041	29.0591	1.18171e-185	2.9881e-183	2154.81	2104.49	2319.27	6415.3	6383.55	6485.72
67	EPHA2	3608.44	1.57692	0.0546261	28.8676	3.05092e-183	7.59951e-181	1834.11	1770.9	1830.35	5392.72	5624.63	5197.94
68	CARS	2423.03	1.66016	0.0575422	28.8512	4.88744e-183	1.19951e-180	1168.96	1135.39	1190.19	3650.24	3786.65	3606.76
69	CHAC1	558.281	4.05639	0.14137	28.6933	4.61868e-181	1.11712e-178	77.2049	48.5042	64.2227	986.739	1183.76	989.249
70	ACTA2	1435.44	-2.1613	0.0755719	-28.5992	6.87689e-180	1.63955e-177	2392.36	2213.37	2433.21	576.511	498.637	498.527
71	NR2F1	1280.02	-2.0987	0.0736399	-28.4994	1.19039e-178	2.79808e-176	2099.38	2143.09	1983.65	475.945	516.588	461.454
72	HSPA9	7704.45	1.56966	0.055135	28.4694	2.80056e-178	6.49146e-176	3720.68	4187.2	3740.46	11526.2	11257.2	11794.9
73	ATF4	10704.5	1.35654	0.0482552	28.1119	7.01063e-174	1.60275e-171	5808.18	5908.6	6321.8	15601.6	15291.2	15295.3
74	DUSP5	647.753	2.78978	0.100734	27.6944	8.15013e-169	1.83808e-166	172.226	170.26	148.127	1182.89	1138.89	1074.12
75	BTG2	2270.46	-1.58472	0.0580585	-27.2953	4.82862e-164	1.07446e-161	3340.6	3365.6	3510.5	1134.1	1157.84	1114.12
76	ZNF503	2527.72	-1.51943	0.0559397	-27.1619	1.82965e-162	4.01776e-160	3828.57	3661.57	3753.92	1333.24	1290.47	1298.51
77	PGK1	16863.1	1.36797	0.0506689	26.9982	1.55192e-160	3.36364e-158	9122.06	9062.36	10070.5	24007.3	24459.1	24457.1
78	CD68	1313.31	1.96562	0.0728422	26.9846	2.23815e-160	4.78879e-158	563.2	485.042	558.324	2115.86	2085.3	2072.15
79	CCDC86	4603.78	1.68348	0.0629403	26.7473	1.32696e-157	2.80325e-155	2110.27	2081.72	2366.92	6916.14	7474.57	6673.04
80	DUSP6	439.599	5.18898	0.194172	26.7237	2.49928e-157	5.2138e-155	22.7655	16.828	31.0755	815.479	909.514	841.934
81	LOXL2	3474.35	1.36451	0.0514802	26.5054	8.38763e-155	1.72816e-152	1948.93	1916.41	1966.04	5031.28	5080.11	4903.32
82	CEBPG	1926.01	1.7841	0.0673254	26.4996	9.79357e-155	1.99323e-152	904.683	880.994	814.179	3029.92	2808.32	3117.99
83	RRP12	1959.71	1.75792	0.0664032	26.4734	1.96236e-154	3.94577e-152	901.714	841.399	940.552	3098.62	3119.47	2856.53
84	SLC6A17	472.037	3.26962	0.12401	26.3658	3.3865e-153	6.72826e-151	84.1336	103.938	77.6888	890.157	863.639	812.667
85	IRAK1	16075.7	1.37479	0.0524488	26.212	1.94115e-151	3.81127e-149	9069.6	8415.97	9357.88	23375.1	23980.5	22255.2
86	FKBP4	12553.1	1.24901	0.0476701	26.2011	2.57935e-151	5.00545e-149	7399.79	7141	7764.74	17858.9	17836.2	17317.7
87	TARS	9417.16	1.40946	0.053808	26.1942	3.09011e-151	5.92769e-149	5181.64	5460.19	4810.49	13766.6	13315.6	13968.5
88	ANKRD1	3378.23	1.46679	0.0560351	26.1763	4.95245e-151	9.39221e-149	1775.71	1846.13	1763.02	4866.99	4807.86	5209.65
89	SMOX	1095.51	1.98425	0.0758753	26.1515	9.48468e-151	1.77854e-148	437.494	415.75	473.384	1715.59	1803.07	1727.77
90	CCND1	6566.65	1.20621	0.0463309	26.0346	2.00823e-149	3.72392e-147	3963.19	3980.31	3969.38	9235.12	9312.55	8939.33
91	ZNF467	1418.49	-2.10554	0.0821549	-25.6289	7.27227e-145	1.3337e-142	2327.04	2129.23	2449.79	513.782	602.354	488.771
92	ARC	701.839	2.30012	0.0897989	25.6141	1.0616e-144	1.92576e-142	229.635	228.663	252.748	1155.01	1195.73	1149.25
93	COL4A5	1176.02	-1.8482	0.0723559	-25.5432	6.53552e-144	1.17281e-141	1889.54	1855.04	1777.52	534.691	508.61	490.722
94	TUBA1C	18466.6	1.12398	0.0440353	25.5245	1.0533e-143	1.87006e-141	11561.9	11495.5	11791.1	25648.3	25811.4	24491.2
95	TNC	1440.65	1.76543	0.0693563	25.4545	6.299e-143	1.10657e-140	659.211	671.14	633.941	2344.88	2207.96	2126.79
96	HILPDA	862.536	2.22556	0.0874539	25.4484	7.35745e-143	1.27905e-140	289.023	303.894	319.042	1424.85	1320.39	1518.02
97	NMRK2	464.5	2.91409	0.114744	25.3965	2.75441e-142	4.739e-140	116.797	105.917	103.585	839.376	802.806	818.52
98	HSPA8	11557.9	-1.18412	0.0467057	-25.3528	8.37419e-142	1.42609e-139	15895.3	15627.3	16632.7	7142.16	6886.18	7163.76
99	NR4A1	1301.3	1.74236	0.0688182	25.3184	2.0057e-141	3.38113e-139	628.527	595.909	571.79	1980.45	2017.49	2013.62
100	RUNX1	1101.65	1.99865	0.078963	25.3113	2.40053e-141	4.00625e-139	429.576	463.264	429.878	1846.03	1807.06	1634.11
101	SRM	6584.74	1.65868	0.065669	25.2582	9.2032e-141	1.52072e-138	2972.39	3152.77	3378.94	9360.58	10960	9683.71
102	PLAUR	889.44	2.07958	0.0823688	25.2472	1.21554e-140	1.98884e-138	333.565	341.509	345.974	1439.78	1514.86	1360.95
103	PES1	7310.19	1.35349	0.053951	25.0873	6.83899e-139	1.10811e-136	3987.93	3949.63	4400.29	10521.6	10776.5	10225.2
104	GPT2	1573.86	1.6466	0.0656761	25.0715	1.01821e-138	1.63394e-136	762.151	725.583	798.641	2435.48	2397.45	2323.86
105	SSPO	386.583	-3.35993	0.134033	-25.0679	1.1142e-138	1.77094e-136	714.64	681.038	717.845	72.6862	72.801	60.4866
106	GPR3	420.051	3.35069	0.133766	25.0488	1.79833e-138	2.83135e-136	92.052	61.3726	71.4737	801.539	729.007	764.863
107	MFSD12	3219.71	1.42259	0.0569527	24.9784	1.04914e-137	1.63636e-135	1808.38	1640.23	1800.31	4654.9	4799.88	4614.54
108	MTHFD2	3925.82	1.36288	0.0545635	24.9778	1.06468e-137	1.64522e-135	2167.68	2293.56	2132.82	5594.84	5491.99	5874.03
109	TP53INP1	673.508	-2.60719	0.104441	-24.9633	1.53029e-137	2.34304e-135	1258.04	1190.83	1022.38	177.235	196.463	196.094
110	SLC3A2	8661.99	1.5806	0.063894	24.7379	4.18626e-135	6.35132e-133	4339.31	3983.28	4700.69	13132.3	13699.6	12116.8
111	ACTBL2	369.528	3.42453	0.138456	24.7337	4.64631e-135	6.98579e-133	55.4292	69.2917	64.2227	681.059	667.176	679.986
112	CCT5	18962.8	1.04588	0.0423051	24.7224	6.14199e-135	9.15211e-133	12185.5	12462.6	12477.9	25434.2	25163.2	26053.1
113	CRLF1	1992.58	1.55841	0.0630491	24.7175	6.94282e-135	1.02539e-132	961.102	1000.77	1069	2977.15	3063.63	2883.84
114	CYP24A1	343.926	3.8065	0.154205	24.6846	1.5642e-134	2.28991e-132	47.5107	43.5548	46.6133	636.253	623.296	666.328
115	BOP1	3150.2	1.48821	0.0604161	24.6326	5.65142e-134	8.20143e-132	1730.18	1539.27	1697.76	4519.49	4849.74	4564.79
116	COL5A1	22696.5	-1.13398	0.0465824	-24.3436	6.78083e-131	9.75562e-129	31630.3	30379.5	31541.7	14781.2	14185.2	13661.2
117	KIF21B	1121.36	1.78994	0.0736409	24.3063	1.68024e-130	2.39671e-128	517.669	486.032	505.495	1783.3	1777.14	1658.5
118	PVR	4010.95	1.38491	0.0570422	24.2787	3.29118e-130	4.65479e-128	2192.42	2145.07	2326.52	5893.55	6016.55	5491.6
119	GTPBP2	3789.42	1.32973	0.054838	24.2483	6.8828e-130	9.6527e-128	2160.75	2057.96	2252.98	5280.2	5583.74	5400.87
120	SELENOP	1151.72	-2.00494	0.0827072	-24.2415	8.13102e-130	1.13082e-127	1797.49	1949.08	1785.81	442.091	416.861	519.014
121	GNL3	2101.04	1.40607	0.0583599	24.0931	2.95109e-128	4.0703e-126	1136.3	1181.92	1135.29	3044.85	2991.82	3116.04
122	ENO1	77629.6	1.30575	0.0542313	24.0775	4.30196e-128	5.88487e-126	43953.3	42007.6	48187.8	110102	114193	107334
123	DUSP4	1084.22	1.87178	0.0779569	24.0104	2.16506e-127	2.93762e-125	434.525	482.072	479.599	1801.22	1690.38	1617.53
124	ZNF711	779.825	-2.53745	0.106112	-23.9128	2.25173e-126	3.03058e-124	1327.33	1522.44	1141.51	226.024	233.362	228.288
125	SPRED2	1976.05	1.41997	0.0593832	23.9119	2.30077e-126	3.07181e-124	1067.01	1103.72	1054.5	2932.34	2886.11	2812.63
126	XBP1	9097.06	1.15133	0.0483234	23.8255	1.81798e-125	2.40796e-123	5668.62	5432.47	5844.27	12505	12868.8	12263.2
127	SLC12A8	322.384	4.77073	0.200825	23.7557	9.59959e-125	1.26148e-122	24.7452	16.828	26.9321	654.175	625.291	586.33
128	MEGF8	4854.45	-1.21147	0.0510885	-23.7131	2.64072e-124	3.44305e-122	6825.71	6610.43	6906.02	3017.97	2954.92	2811.65
129	MAFF	470.947	2.66098	0.112251	23.7056	3.15536e-124	4.08216e-122	137.583	122.745	125.338	828.423	848.68	762.912
130	APOLD1	1369.32	1.73372	0.0732497	23.6686	7.60074e-124	9.75759e-122	677.028	637.484	584.22	2091.97	2016.49	2208.74
131	KIFC3	1009.13	1.75876	0.0743676	23.6496	1.19159e-123	1.51804e-121	442.444	458.315	480.635	1553.29	1577.69	1542.41
132	SMS	16710.1	0.996881	0.042213	23.6155	2.67214e-123	3.37843e-121	11044.3	11169.8	11254.5	21894.5	22239.2	22658.1
133	KLF4	1526.1	1.56292	0.0664867	23.5073	3.43221e-122	4.30678e-120	818.57	767.158	729.239	2237.34	2310.68	2293.61
134	ALDOA	43998.6	1.40011	0.0595931	23.4945	4.63755e-122	5.77582e-120	23629.7	22592.1	26319.9	62879.5	67539.4	61031
135	CPE	3701.59	-1.17962	0.0502483	-23.4759	7.19539e-122	8.8951e-120	5205.39	5152.33	5049.77	2236.34	2285.75	2279.95
136	SESN3	2211.15	-1.90136	0.0814149	-23.354	1.25638e-120	1.54175e-118	3475.21	3897.16	3093.05	937.95	860.648	1002.91
137	TOMM40	6870.84	1.30604	0.0561262	23.2697	8.99183e-120	1.09536e-117	3950.32	3683.35	4238.7	9945.06	9879	9528.59
138	SERPINE2	1753.04	1.54531	0.0665385	23.2243	2.58571e-119	3.12702e-117	941.306	888.913	853.541	2470.33	2664.72	2699.46
139	H1F0	17964.4	1.04998	0.0454239	23.115	3.26879e-118	3.92466e-116	11852.9	11483.6	11767.3	24035.2	25140.3	23506.8
140	LAMB2	4791.87	-1.20869	0.0523513	-23.0881	6.09457e-118	7.26516e-116	6718.81	6480.75	6868.73	2930.35	2983.84	2768.73
141	GPAT3	669.883	2.04612	0.088824	23.0356	2.04886e-117	2.42507e-115	255.37	273.207	254.819	1048.47	1084.04	1103.39
142	LAMA5	7247.21	-1.22849	0.0533567	-23.0241	2.67241e-117	3.14083e-115	10628.5	9791.91	10056	4542.39	4314.21	4150.16
143	IARS	9257.58	1.17818	0.051192	23.015	3.29826e-117	3.84928e-115	5566.67	5938.3	5517.98	12897.3	12312.3	13312.9
144	TUBB3	1399.37	1.75025	0.0761742	22.9769	7.92669e-117	9.1867e-115	593.884	603.828	727.167	2170.63	2168.07	2132.64
145	P4HA1	1441.45	1.56304	0.0680447	22.9708	9.12546e-117	1.05031e-114	739.385	758.249	688.841	2147.73	2083.31	2231.17
146	MOSPD1	2635.47	-1.31078	0.0570658	-22.9695	9.39854e-117	1.07433e-114	3791.95	3761.55	3716.63	1497.53	1451.03	1594.11
147	NEURL1	770.223	1.98621	0.0867725	22.8898	5.86489e-116	6.65845e-114	307.83	315.772	307.648	1215.75	1312.41	1161.93
148	BCAT1	1401.6	1.73108	0.075818	22.832	2.2066e-115	2.48824e-113	625.558	710.735	610.116	2162.66	2024.47	2276.05
149	ANXA1	4550.09	1.50761	0.0661491	22.7911	5.62219e-115	6.29723e-113	2399.29	2482.62	2220.86	6761.8	6154.18	7281.81
150	MAP1A	2330.95	-1.31202	0.0579109	-22.6557	1.22443e-113	1.3623e-111	3448.49	3263.64	3257.75	1361.12	1351.31	1303.39
151	ENTR1	5905.35	1.25581	0.0554333	22.6545	1.25978e-113	1.39235e-111	3535.59	3293.34	3629.62	8187.65	8746.09	8039.84
152	LIPG	278.142	4.22984	0.18758	22.5496	1.35595e-112	1.48878e-110	30.684	20.7875	33.1472	536.683	527.558	519.99
153	SPRY2	1188.46	1.58596	0.0705567	22.4778	6.85178e-112	7.47381e-110	609.721	565.222	607.009	1736.5	1826.01	1786.31
154	DDX21	5245.05	1.49816	0.0667906	22.4307	1.97634e-111	2.14176e-109	2654.66	3039.93	2532.65	7826.21	7296.06	8120.81
155	OLFM1	816.648	1.88609	0.0842267	22.393	4.6083e-111	4.9618e-109	347.422	334.58	361.512	1285.45	1357.29	1213.63
156	SPRED3	482.514	2.41815	0.108562	22.2745	6.53221e-110	6.98821e-108	133.624	165.31	157.449	821.453	839.705	777.545
157	DKC1	2622.31	1.21312	0.0545494	22.2389	1.44314e-109	1.53405e-107	1582.7	1547.18	1611.78	3732.88	3633.07	3626.27
158	MICAL2	2916.88	1.21322	0.0548235	22.1295	1.64441e-108	1.73694e-106	1773.73	1717.44	1782.7	4135.15	4161.62	3930.65
159	MDM2	6014.84	-1.30041	0.0589398	-22.0633	7.11945e-108	7.47273e-106	8696.44	9111.86	7859	3532.75	3382.75	3506.27
160	RRP9	875.762	1.90226	0.0864191	22.012	2.20987e-107	2.30503e-105	363.259	351.408	394.659	1430.82	1451.03	1263.39
161	CCN2	2644.83	1.27319	0.0580503	21.9326	1.26995e-106	1.31641e-104	1457.98	1602.62	1583.82	3732.88	3820.56	3671.15
162	ITGA3	3027.3	1.37369	0.0626371	21.9309	1.31878e-106	1.35859e-104	1553.01	1664.98	1840.71	4375.11	4370.06	4359.91
163	PCK2	1603.06	1.52927	0.069887	21.882	3.85822e-106	3.9503e-104	818.57	766.168	890.832	2286.13	2476.23	2380.44
164	RUVBL1	3219.37	1.19388	0.0553541	21.5681	3.58373e-103	3.64688e-101	1901.42	1946.11	2028.2	4450.78	4649.29	4340.4
165	SEPHS2	3207.63	1.11064	0.0517195	21.4742	2.71151e-102	2.74257e-100	2055.83	1978.77	2057.2	4362.17	4389	4402.84
166	STIP1	13765.1	1.17207	0.0545917	21.4697	2.99089e-102	3.00692e-100	8492.54	8015.07	8879.31	20021.6	19129.7	18052.3
167	MAT2A	3500.97	-1.07658	0.0505718	-21.2881	1.46412e-100	1.46315e-98	4692.67	4751.43	4805.31	2240.33	2290.74	2225.32
168	TFPI2	366.068	2.66238	0.125173	21.2697	2.16848e-100	2.15415e-98	89.0826	99.978	110.836	658.158	598.364	639.987
169	PYCR1	4523.89	1.15495	0.0543294	21.2583	2.76324e-100	2.72874e-98	2779.38	2665.75	2967.71	6157.41	6177.12	6395.97
170	CTH	502.78	2.2796	0.107337	21.2379	4.26964e-100	4.19153e-98	168.267	182.138	164.7	792.578	796.822	912.177
171	TUBA1A	6179.2	-1.05076	0.0496453	-21.1653	1.99541e-99	1.94745e-97	8157.99	8132.87	8714.61	3995.75	3994.08	4079.92
172	KRT18	27178.5	1.41492	0.0668568	21.1635	2.0728e-99	2.01122e-97	14106.7	13972.2	16398.6	37577.7	43062.3	37953.4
173	TOP1	7886.43	1.22265	0.0579575	21.0956	8.73202e-99	8.42362e-97	4735.23	5077.1	4380.61	11093.1	10625	11407.6
174	KCNG1	1764.29	1.29946	0.0616863	21.0656	1.64669e-98	1.5794e-96	1005.64	1037.4	1015.13	2455.4	2606.87	2465.32
175	SPARC	10494.1	-0.962546	0.0456992	-21.0627	1.75059e-98	1.66947e-96	13787	13543.6	14281.3	7217.84	7169.4	6965.71
176	EIF5A	27265.5	1.07677	0.0511915	21.0342	3.19444e-98	3.02909e-96	17248.4	16765.6	18600.8	37113.8	38202.6	35661.7
177	ATIC	4794.75	1.10537	0.0526031	21.0135	4.93871e-98	4.65662e-96	2971.4	2978.55	3179.03	6403.35	6789.44	6446.7
178	PLEKHG4B	827.408	-1.70575	0.0811757	-21.013	4.98606e-98	4.67485e-96	1249.14	1220.52	1330.03	381.353	403.896	379.505
179	RANGAP1	9842.77	1.18287	0.0565163	20.9297	2.87077e-97	2.67655e-95	5823.03	5732.4	6504.11	13895	14007.7	13094.4
180	FXYD6	2160.3	-1.46092	0.0698417	-20.9175	3.70749e-97	3.43747e-95	3188.17	2967.66	3352.01	1139.08	1247.59	1067.3
181	PEA15	5642.27	1.05893	0.0506847	20.8925	6.26157e-97	5.77344e-95	3575.18	3553.67	3851.29	7712.7	7632.14	7528.63
182	EBNA1BP2	2248.12	1.40555	0.0673745	20.8617	1.19346e-96	1.09438e-94	1162.03	1169.05	1366.29	3218.1	3352.84	3220.42
183	OLFML3	359.961	-2.53551	0.121793	-20.8182	2.96368e-96	2.70278e-94	595.864	625.605	620.475	112.514	109.7	95.6078
184	SLC43A1	1121.34	1.53163	0.0736613	20.7929	5.0206e-96	4.55374e-94	587.945	536.516	604.937	1657.84	1722.29	1618.5
185	SHMT2	12887.6	1.16545	0.0560574	20.7903	5.29787e-96	4.77926e-94	7958.04	7366.7	8519.87	17828	18365.8	17287.5
186	NME1	2116.3	1.28374	0.061898	20.7396	1.52147e-95	1.36515e-93	1270.91	1151.23	1275.13	2943.29	3087.56	2969.7
187	FOSL2	1733.78	1.265	0.0609983	20.7382	1.56641e-95	1.39796e-93	1000.69	998.79	1057.6	2476.31	2429.36	2439.95
188	MMP1	490.952	7.42138	0.359217	20.6599	7.95436e-95	7.06119e-93	2.96942	4.94941	9.32266	971.804	970.348	986.322
189	ABAT	761.649	-1.70034	0.0823402	-20.6502	9.7296e-95	8.59139e-93	1141.25	1206.67	1146.69	344.512	362.01	368.773
190	YDJC	1797.27	1.45809	0.0706459	20.6395	1.21399e-94	1.06633e-92	914.581	920.59	1043.1	2534.06	2811.32	2559.95
191	FAT4	638.189	-2.05941	0.0998101	-20.6333	1.37845e-94	1.20445e-92	1070.97	1109.66	907.405	247.929	247.324	245.849
192	SLC9A3	522.873	-2.02912	0.0984159	-20.6178	1.89892e-94	1.65058e-92	865.091	813.682	841.111	192.17	216.408	208.776
193	EPPK1	1532.41	-1.36473	0.066266	-20.5948	3.05588e-94	2.64247e-92	2269.63	2106.47	2246.76	824.44	892.56	854.617
194	RNF126	3972.78	1.1487	0.0558278	20.5758	4.52549e-94	3.89308e-92	2456.7	2396.5	2556.48	5277.21	5777.21	5372.58
195	PRMT5	5184.96	1.14038	0.0554844	20.5531	7.22271e-94	6.18153e-92	3182.23	3073.58	3453.53	7108.31	7345.92	6946.2
196	PBX1	3536.2	-1.13069	0.0552107	-20.4796	3.27331e-93	2.78716e-91	4853.02	5087.99	4624.04	2214.44	2187.02	2250.69
197	DVL1	4599.98	1.07056	0.0523877	20.4354	8.10606e-93	6.86711e-91	2952.59	2867.69	3082.69	6125.55	6456.35	6115
198	WARS	3825.32	1.09471	0.0537121	20.3811	2.4631e-92	2.07609e-90	2452.74	2348.99	2518.15	5307.09	5307.49	5017.46
199	RAB3IL1	1104.3	1.5047	0.073993	20.3357	6.20941e-92	5.20748e-90	593.884	546.415	586.291	1625.98	1711.32	1561.92
200	SLC20A1	4492.16	1.09166	0.0537863	20.2963	1.38595e-91	1.15651e-89	2902.11	2854.82	2850.66	6210.19	6362.61	5772.57
201	MRTO4	2891.62	1.41362	0.0697192	20.2759	2.10074e-91	1.74424e-89	1533.21	1528.38	1673.93	4162.03	4605.41	3846.75
202	XPOT	5560.19	1.18264	0.0583979	20.2514	3.45222e-91	2.85218e-89	3459.37	3593.27	3148.99	7733.61	7397.78	8028.13
203	SLC6A9	825.957	1.79854	0.0888885	20.2337	4.947e-91	4.06702e-89	359.3	337.55	410.197	1286.45	1362.28	1199.98
204	WDR77	2862.33	1.16048	0.0574652	20.1946	1.0927e-90	8.93924e-89	1742.06	1711.5	1855.21	3957.91	4089.82	3817.48
205	MYEOV	241.517	5.24737	0.260009	20.1815	1.4246e-90	1.15976e-88	11.8777	13.8583	11.3944	476.941	467.722	467.308
206	EIF1	14605.9	0.990981	0.0491069	20.1801	1.46491e-90	1.18679e-88	9786.22	9309.83	10238.3	19275.8	19950.5	19074.7
207	UBALD2	3073.81	1.19125	0.0590548	20.172	1.72543e-90	1.3911e-88	1844.01	1761	2012.66	4310.39	4300.25	4214.55
208	NR1D1	1380.82	1.54962	0.0769324	20.1425	3.12828e-90	2.50999e-88	723.549	669.16	716.809	2134.78	2185.03	1855.57
209	HIST1H1C	747.434	-1.73633	0.0864361	-20.088	9.38936e-90	7.49756e-88	1145.21	1082.93	1221.27	338.538	363.008	333.652
210	BHLHE41	771.68	1.619	0.0805966	20.0877	9.45317e-90	7.51257e-88	385.035	380.114	371.87	1151.03	1194.73	1147.29
211	ARHGEF2	6295.84	1.14183	0.0568773	20.0754	1.21179e-89	9.58463e-88	4047.32	3639.79	4093.68	8811.95	8893.69	8288.61
212	SPRYD3	1648.07	1.41662	0.0706237	20.0587	1.69403e-89	1.33357e-87	833.417	880.005	981.986	2376.74	2502.16	2314.1
213	SLC39A14	4042.98	0.983204	0.0491403	20.0081	4.68156e-89	3.6681e-87	2751.66	2691.49	2705.64	5428.56	5282.56	5397.94
214	WDR74	1558.89	1.36343	0.0684241	19.9261	2.41754e-88	1.88534e-86	864.101	808.733	945.732	2208.46	2268.8	2257.52
215	NFIL3	832.231	1.6393	0.0823106	19.9161	2.95325e-88	2.29241e-86	395.923	421.689	395.695	1178.91	1312.41	1288.75
216	FRAS1	1895.53	-1.26019	0.063293	-19.9104	3.30348e-88	2.5524e-86	2754.63	2719.2	2549.23	1166.96	1112.96	1070.22
217	ULBP1	838.831	1.58181	0.0796004	19.8719	7.12204e-88	5.47741e-86	413.739	447.426	398.803	1282.46	1250.58	1239.98
218	PKM	57742.2	1.02822	0.0517753	19.8594	9.14338e-88	6.99972e-86	37702.7	35862.4	40418.9	77786.1	79745	74938
219	HEXIM1	1732.61	-1.24403	0.0627264	-19.8326	1.55653e-87	1.18616e-85	2473.53	2393.53	2442.54	1081.33	981.318	1023.39
220	MDGA1	513.962	-1.99512	0.100642	-19.8239	1.8504e-87	1.4037e-85	850.244	823.581	791.39	228.015	193.471	197.069
221	AARS	7449.53	1.0569	0.0533298	19.8181	2.07635e-87	1.56797e-85	4812.44	4606.91	5091.21	10220.9	10332.8	9632.98
222	TIMP1	13516.3	1.22804	0.0621012	19.7748	4.90977e-87	3.69095e-85	7988.73	7480.53	8794.37	18231.3	20219.7	18383
223	MAGED2	9650.36	-1.13272	0.0573769	-19.7417	9.45229e-87	7.07396e-85	12843.7	12819	14104.1	5680.47	6392.53	6062.32
224	LRP1	12055.7	-1.01219	0.0513038	-19.7293	1.20829e-86	9.0023e-85	16549.6	15935.1	15873.4	8487.35	7873.48	7615.46
225	ROBO2	473.301	-2.04454	0.103655	-19.7244	1.33104e-86	9.8728e-85	779.968	791.905	713.701	187.192	189.482	177.557
226	MMP10	219.809	4.95512	0.252211	19.6467	6.17169e-86	4.55749e-84	18.8063	9.89881	12.4302	428.151	440.795	408.772
227	WNT5A	613.666	-1.93204	0.0987965	-19.5557	3.68883e-85	2.71202e-83	981.888	1060.16	875.294	243.947	257.297	263.409
228	GART	5386.05	0.915023	0.0468278	19.5402	5.00092e-85	3.66055e-83	3756.32	3697.21	3745.64	7160.08	7010.84	6946.2
229	AK2	9009.59	0.931178	0.0476903	19.5255	6.66242e-85	4.84678e-83	6072.46	6031.35	6493.75	11761.2	11923.4	11775.4
230	DNAJA3	4452.05	1.04979	0.0537655	19.5254	6.6796e-85	4.84678e-83	2853.61	2811.26	3036.08	6032.95	6196.06	5782.32
231	MRPL4	4425.62	1.13256	0.058049	19.5104	8.96256e-85	6.47516e-83	2752.65	2633.08	2932.49	5928.4	6416.46	5890.61
232	PLAU	590.261	1.80971	0.0928743	19.4856	1.45504e-84	1.04669e-82	247.452	266.278	272.429	916.045	959.378	879.982
233	FTH1	81307.9	0.956743	0.0491374	19.4708	1.94292e-84	1.39165e-82	55254	52970.5	57658.6	105893	112215	103856
234	PFKFB3	1380.16	1.33546	0.0687287	19.4309	4.22944e-84	3.01646e-82	799.764	766.168	784.139	2074.04	1989.56	1867.28
235	CSRNP1	1403.62	1.35952	0.0699866	19.4255	4.69849e-84	3.33672e-82	805.702	724.593	831.788	2038.2	2067.35	1954.11
236	IL6R	1533.84	1.33195	0.0686233	19.4096	6.39811e-84	4.5245e-82	827.478	943.357	845.254	2262.23	2196	2128.74
237	SFPQ	7658.41	-0.945658	0.0487361	-19.4036	7.18903e-84	5.06235e-82	10311.8	9959.2	9975.24	5441.5	5226.71	5036
238	LUC7L3	3764.21	-1.22524	0.0631965	-19.3878	9.78345e-84	6.86034e-82	5298.43	5541.36	4979.33	2265.22	2088.29	2412.63
239	TM7SF2	1922.14	-1.25244	0.0647578	-19.3404	2.45786e-83	1.71629e-81	2640.8	2586.56	2896.24	1104.23	1150.85	1154.12
240	HMGA1	23267.3	1.01608	0.05254	19.3391	2.518e-83	1.75095e-81	15978.4	14416.6	15794.7	32211.9	31378.2	29823.8
241	IPO4	3507.69	1.21127	0.062697	19.3194	3.68572e-83	2.55233e-81	2094.43	1960.96	2293.37	4933.7	5068.15	4695.52
242	TP53INP2	1239.63	-1.35818	0.070427	-19.285	7.17984e-83	4.95142e-81	1856.88	1772.88	1720.55	709.935	719.035	658.523
243	TSPAN11	1182.71	-1.41263	0.0733004	-19.2718	9.2589e-83	6.35892e-81	1762.85	1599.65	1796.17	661.145	646.234	630.231
244	SLCO4A1	1488.06	1.25663	0.0652679	19.2534	1.32312e-82	9.04983e-81	875.979	855.258	903.262	2022.27	2176.05	2095.57
245	MYOF	1758.74	1.32805	0.0691606	19.2024	3.5333e-82	2.40682e-80	1037.32	1057.19	910.513	2633.63	2456.29	2457.51
246	GPRC5A	4633.36	0.943035	0.0491166	19.1999	3.7051e-82	2.51359e-80	3133.73	3120.11	3258.79	6199.23	6090.35	5997.93
247	TINAGL1	835.612	1.54455	0.0805624	19.1721	6.32765e-82	4.27539e-80	416.709	406.841	456.81	1208.78	1287.48	1237.05
248	PIM1	3600.75	1.02226	0.0533265	19.1698	6.62064e-82	4.45532e-80	2447.79	2301.47	2378.31	4727.59	4992.35	4756.98
249	MOV10	3128.86	-1.09446	0.0570947	-19.1692	6.69432e-82	4.48681e-80	4239.34	4093.16	4453.12	1984.43	2075.33	1927.77
250	FARSB	1758.39	1.22856	0.0643152	19.1022	2.4208e-81	1.61603e-79	1090.77	1072.04	992.345	2482.28	2369.52	2543.36
251	RTN4	8373.19	0.890994	0.046724	19.0693	4.54495e-81	3.02194e-79	5939.83	5895.73	5764.51	10983.6	10514.3	11141.2
252	EBF4	1908.22	-1.28892	0.0676699	-19.0472	6.93595e-81	4.59341e-79	2771.46	2553.89	2798.87	1103.24	1186.76	1035.1
253	HGS	6071.83	1.03692	0.0545001	19.026	1.03891e-80	6.85309e-79	4009.71	3750.66	4177.59	8238.43	8405.03	7849.6
254	C1QBP	7422.78	1.09764	0.0577908	18.9933	1.93586e-80	1.27195e-78	4365.05	4739.55	5079.81	9815.62	10386.6	10150
255	NSUN2	5517.2	0.895962	0.0471856	18.988	2.14172e-80	1.40169e-78	3799.87	3897.16	3874.08	7122.25	7329.96	7079.86
256	FAXDC2	556.634	-1.86799	0.0985388	-18.9569	3.8759e-80	2.52676e-78	861.132	878.025	882.545	206.11	260.289	251.702
257	CSPG4	4866.82	0.988165	0.0521377	18.953	4.17171e-80	2.70901e-78	3296.06	3183.46	3307.47	6678.17	6571.04	6164.75
258	RSL1D1	9899.08	0.861345	0.0456308	18.8764	1.78283e-79	1.15324e-77	7020.7	7217.23	6848.01	12648.4	12617.5	13042.7
259	ST6GALNAC2	366.936	-2.20755	0.116956	-18.875	1.83137e-79	1.18007e-77	616.649	583.04	610.116	117.493	142.61	131.705
260	COL14A1	527.841	-1.80876	0.0959808	-18.845	3.22854e-79	2.07235e-77	848.264	809.723	805.892	231.998	222.392	248.776
261	GFPT1	3179.4	1.12002	0.0595295	18.8144	5.75098e-79	3.67732e-77	2026.13	2109.44	1874.89	4486.63	4171.6	4407.72
262	KLHL15	4833.52	-1.24568	0.0662136	-18.813	5.90941e-79	3.76421e-77	6927.66	7275.63	6195.42	2786.97	2735.52	3079.94
263	DDB2	4406.52	-1.0534	0.0560719	-18.7866	9.71575e-79	6.16525e-77	5867.57	5630.45	6344.59	2854.67	2893.09	2848.72
264	FSTL3	817.233	1.60594	0.0854955	18.7839	1.0231e-78	6.46765e-77	425.617	357.347	429.878	1251.6	1255.57	1183.39
265	MRPL12	6798.02	1.22552	0.065321	18.7615	1.55946e-78	9.8211e-77	3943.39	3743.73	4531.85	9355.6	9974.74	9238.84
266	PIK3R3	920.81	-1.50575	0.0804786	-18.7099	4.10792e-78	2.57733e-76	1394.64	1374.95	1316.57	482.915	435.809	519.99
267	CDKN1A	12535.8	-0.929106	0.0496741	-18.704	4.58962e-78	2.86877e-76	16472.4	15761.9	17081.2	8746.24	8862.77	8290.57
268	STOML2	5751.74	1.07829	0.0576566	18.7019	4.77291e-78	2.9722e-76	3669.21	3434.89	3988.03	7659.93	7973.21	7785.21
269	LAMB1	3256.72	0.96421	0.0515619	18.7001	4.94377e-78	3.06716e-76	2199.35	2201.5	2220.86	4396.02	4210.49	4312.11
270	PARM1	1267.52	-1.29254	0.0691429	-18.6937	5.5721e-78	3.44417e-76	1800.46	1847.12	1752.66	779.634	713.051	712.181
271	CHCHD10	3474.05	1.06467	0.0570653	18.657	1.10741e-77	6.81979e-76	2293.38	2118.35	2330.66	4694.73	4869.69	4537.47
272	S100A16	1762.69	1.45825	0.0782682	18.6315	1.78388e-77	1.09453e-75	980.898	828.531	1013.06	2436.48	2790.37	2526.78
273	TRO	1807.35	-1.16169	0.0624577	-18.5997	3.2312e-77	1.9753e-75	2572.51	2378.68	2543.01	1122.15	1141.88	1085.83
274	EIF6	5385.67	1.19533	0.0643331	18.5803	4.63973e-77	2.826e-75	3210.93	2981.52	3630.66	7332.34	7666.05	7492.53
275	WDR3	1751.23	1.1346	0.0612654	18.5194	1.44091e-76	8.74447e-75	1132.34	1095.8	1059.68	2394.66	2360.55	2464.34
276	SINHCAF	3446.98	0.975873	0.0527787	18.4899	2.491e-76	1.50624e-74	2288.43	2400.46	2281.98	4460.74	4564.52	4685.76
277	F2RL1	1825.28	1.16621	0.0630768	18.4887	2.54672e-76	1.53437e-74	1118.48	1187.86	1069	2500.2	2475.23	2600.92
278	PRMT1	8927.47	0.966021	0.0523192	18.464	4.02707e-76	2.41754e-74	5919.04	5789.82	6428.49	11489.4	12116.9	11821.2
279	FBN1	1292.44	-1.2384	0.0671869	-18.4321	7.2581e-76	4.34159e-74	1753.94	1884.73	1807.56	781.625	761.917	764.863
280	WDR6	3078.7	-1.16439	0.0632168	-18.4191	9.23948e-76	5.50706e-74	4376.92	3928.84	4467.62	1988.41	1893.82	1816.55
281	NAT10	4549.35	0.955781	0.0519426	18.4007	1.29655e-75	7.70042e-74	2993.17	3050.81	3242.21	5982.17	6133.24	5894.52
282	AGRN	13297.9	-0.877106	0.0476787	-18.3962	1.40947e-75	8.34138e-74	17459.2	16541.9	17659.2	9426.3	9624.69	9075.92
283	HSPD1	8235.64	0.948207	0.0516169	18.3701	2.28082e-75	1.34504e-73	5507.28	5887.81	5472.4	11101.1	10356.7	11088.6
284	MFSD2A	533.093	1.77812	0.0968615	18.3573	2.8838e-75	1.69464e-73	231.615	262.319	227.887	856.303	806.795	813.642
285	SLIT3	869.183	-1.41526	0.0771158	-18.3523	3.16142e-75	1.85126e-73	1282.79	1221.51	1288.6	478.932	487.667	455.601
286	CCNL2	2280.16	-1.17499	0.0641856	-18.3061	7.39678e-75	4.31625e-73	3229.74	2930.05	3321.97	1405.93	1444.05	1349.24
287	NPAS1	2532.01	1.2785	0.0699896	18.267	1.51462e-74	8.80747e-73	1457.98	1355.15	1622.14	3517.81	3819.56	3419.44
288	RAB31	5250.77	0.935454	0.0514131	18.1949	5.66748e-74	3.28419e-72	3686.04	3715.02	3415.2	6988.82	6787.45	6912.06
289	TSHZ2	505.024	-1.85352	0.102011	-18.1699	8.93575e-74	5.16017e-72	760.171	861.197	752.028	218.058	209.428	229.264
290	SPNS2	217.816	2.9824	0.164291	18.1531	1.21253e-73	6.97788e-72	41.5719	50.484	54.9001	394.298	394.921	370.724
291	MYBBP1A	2919.24	1.16601	0.0643286	18.1259	1.99157e-73	1.14218e-71	1881.62	1641.22	1876.96	4184.93	4087.83	3842.85
292	MED10	1653.62	1.22235	0.0674444	18.1239	2.065e-73	1.18023e-71	978.919	961.175	1036.89	2175.61	2444.32	2324.83
293	FLNC	13820	0.9346	0.0515778	18.1202	2.20867e-73	1.25804e-71	9618.94	9147.49	9715.24	19001	18306	17131.4
294	FAM210B	1917.86	-1.0534	0.0581662	-18.1102	2.64845e-73	1.5034e-71	2546.77	2603.39	2615.52	1230.69	1239.61	1271.19
295	TMEM268	1864.03	1.14492	0.0632872	18.0909	3.75799e-73	2.126e-71	1124.42	1135.39	1223.34	2592.8	2649.76	2458.49
296	SLC1A4	3089.09	0.952766	0.0527127	18.0747	5.04238e-73	2.84298e-71	2091.46	2091.62	2130.74	4071.42	4180.57	3968.7
297	SULF1	383.209	-2.17323	0.120245	-18.0733	5.17641e-73	2.90873e-71	690.885	602.838	588.363	132.428	128.648	156.094
298	PERP	3941.08	0.957989	0.0530733	18.0503	7.84477e-73	4.39333e-71	2628.93	2770.68	2636.24	5086.04	5113.02	5411.6
299	SARS	6936.16	0.937178	0.0519475	18.0409	9.30636e-73	5.19445e-71	4728.31	4506.93	5043.56	9049.92	9188.88	9099.33
300	CBX5	9132.54	-1.09378	0.0606514	-18.0339	1.05524e-72	5.87032e-71	12532.9	13336.7	11443	6011.05	5498.97	5972.56
301	ALDH1L2	991.222	1.47823	0.0820353	18.0194	1.3722e-72	7.60817e-71	479.066	582.05	509.639	1438.79	1404.16	1533.63
302	ZMYM3	4801.12	-0.976601	0.0541985	-18.019	1.38273e-72	7.64119e-71	6244.69	6322.37	6533.11	3300.75	3367.79	3037.99
303	UBE2S	13273.4	1.02238	0.056856	17.9818	2.70364e-72	1.48914e-70	8276.76	8625.83	9371.34	17250.5	18839.5	17276.7
304	PIM3	4819.76	0.892526	0.0496699	17.9692	3.39819e-72	1.86554e-70	3375.24	3263.64	3485.64	6337.64	6285.82	6170.61
305	SAT1	18042.1	0.824039	0.0460221	17.9053	1.07263e-71	5.8692e-70	12558.7	13082.3	13435	22442.1	23499.8	23234.7
306	SEMA6A	1161.15	-1.34183	0.0749778	-17.8964	1.25849e-71	6.86369e-70	1745.03	1717.44	1533.06	661.145	674.157	636.085
307	FBXO9	1377.38	-1.22965	0.0687793	-17.8783	1.74195e-71	9.46951e-70	1885.58	1970.85	1937.04	827.427	875.607	767.79
308	TCP1	7588.5	0.833236	0.0466104	17.8766	1.79459e-71	9.724e-70	5347.92	5483.94	5536.62	9439.24	9903.93	9819.32
309	ATP1B2	1907.4	-1.07876	0.0603539	-17.8739	1.88439e-71	1.01776e-69	2585.37	2532.12	2649.71	1192.85	1279.5	1204.85
310	PPP1R14B	5901.64	1.06303	0.0595806	17.8418	3.34455e-71	1.80055e-69	3948.34	3522	3992.17	7712.7	8426.97	7807.65
311	AHSA2P	794.804	-1.71443	0.0961485	-17.831	4.05768e-71	2.17745e-69	1194.7	1086.89	1373.54	378.366	391.929	343.408
312	PPP2R2C	869.732	1.44584	0.0811399	17.8191	5.02654e-71	2.68871e-69	491.934	486.032	422.627	1318.31	1257.56	1241.93
313	LOC728392	794.65	-1.40332	0.078776	-17.8141	5.49534e-71	2.93009e-69	1177.87	1113.62	1168.44	435.121	434.812	438.04
314	PCDH9	1173.58	-1.55418	0.0873025	-17.8022	6.7936e-71	3.61078e-69	1793.53	1936.21	1522.7	628.287	573.433	587.305
315	ID4	3455.31	-0.934336	0.0525699	-17.7732	1.13972e-70	6.03835e-69	4583.79	4531.68	4494.56	2273.18	2420.38	2428.24
316	ADGRA2	1815.1	-1.13166	0.0637476	-17.7523	1.65567e-70	8.74415e-69	2580.43	2342.06	2555.44	1118.17	1163.82	1130.71
317	PWP1	2150.24	1.02639	0.0578643	17.7379	2.13624e-70	1.12466e-68	1378.8	1449.19	1420.15	2936.32	2918.02	2798.97
318	IMP4	1680.23	1.11952	0.0631344	17.7323	2.36084e-70	1.23899e-68	1040.29	1034.43	1103.18	2228.38	2381.49	2293.61
319	SMTN	2241.91	-1.07495	0.0606463	-17.7248	2.69713e-70	1.41105e-68	3059.49	2892.43	3169.7	1484.59	1455.02	1390.22
320	CD55	1759.22	1.15606	0.0652277	17.7234	2.76502e-70	1.44204e-68	1043.26	1159.15	1066.93	2422.54	2338.61	2524.83
321	SLC25A22	2738.83	1.10158	0.0621639	17.7205	2.91055e-70	1.51321e-68	1856.88	1651.12	1715.37	3701.02	3925.27	3583.34
322	MAFK	730.289	1.51423	0.0856412	17.681	5.86979e-70	3.04226e-68	382.065	348.438	406.053	1118.17	1087.03	1039.98
323	ODC1	8942.18	0.873035	0.0494869	17.6417	1.1776e-69	6.08452e-68	6132.84	6155.08	6661.56	11361.9	11741.9	11599.8
324	NEK6	1093.54	1.23969	0.0703063	17.6327	1.38123e-69	7.11459e-68	621.598	658.271	672.267	1546.32	1544.78	1518.02
325	CUX2	565.716	-1.66574	0.0944976	-17.6274	1.51884e-69	7.79935e-68	810.652	893.863	876.33	257.887	290.207	265.361
326	LAMB3	964.297	1.494	0.0847582	17.6267	1.53762e-69	7.87155e-68	521.628	435.548	559.359	1447.75	1395.19	1426.31
327	ATF3	3663.34	1.00275	0.05695	17.6076	2.15497e-69	1.09982e-67	2403.25	2326.22	2588.59	4825.17	5068.15	4768.69
328	TM4SF19	216.873	2.92171	0.166	17.6007	2.43137e-69	1.23711e-67	53.4496	49.4941	48.685	403.259	404.893	341.457
329	ENO2	4333.04	0.907206	0.0516251	17.573	3.96809e-69	2.01287e-67	3038.71	2913.22	3089.94	5576.92	5841.03	5538.43
330	RAD23A	13641.5	0.963579	0.0548425	17.5699	4.18662e-69	2.11729e-67	9159.67	8883.2	9701.78	17798.2	19192.5	17113.8
331	ZNF598	6123.78	0.925536	0.0526784	17.5695	4.21577e-69	2.12559e-67	4374.94	4027.83	4269.78	8162.76	8227.51	7679.85
332	ADRM1	5492.02	0.957441	0.0545057	17.5659	4.49686e-69	2.26049e-67	3631.6	3608.12	3962.13	7182.99	7528.42	7038.88
333	PRPF19	12164	0.889096	0.0506446	17.5556	5.39112e-69	2.70188e-67	8521.24	8096.24	8973.57	16140.3	15912.5	15340.2
334	CLDN1	676.777	1.46691	0.0835691	17.5533	5.61519e-69	2.80575e-67	360.29	370.216	348.046	999.684	988.299	994.126
335	BMERB1	824.37	1.4268	0.0813183	17.5458	6.40064e-69	3.18866e-67	442.444	430.598	468.205	1149.04	1273.52	1182.42
336	OLIG2	278.965	2.33121	0.133035	17.5233	9.51774e-69	4.72743e-67	83.1437	94.0387	100.478	458.022	474.702	463.405
337	FGFR4	1193.38	1.33011	0.0759073	17.5228	9.58997e-69	4.74917e-67	678.017	626.595	733.382	1725.55	1783.13	1613.63
338	OSMR	2102.21	1.15466	0.065939	17.511	1.18041e-68	5.82836e-67	1290.71	1416.52	1201.59	2904.46	2832.26	2967.75
339	INHBE	170.947	3.61524	0.206528	17.5048	1.31605e-68	6.47894e-67	22.7655	27.7167	26.9321	320.616	330.098	297.555
340	NOC2L	7460.35	0.989577	0.056642	17.4707	2.39464e-68	1.17542e-66	5012.38	4769.25	5211.36	10078.5	10422.5	9268.11
341	MYL6	5485.83	-1.20712	0.0691071	-17.4674	2.53737e-68	1.24182e-66	7487.89	6933.13	8546.8	3154.38	3354.83	3437.98
342	EMG1	1067.86	1.33184	0.0762694	17.4624	2.77207e-68	1.35272e-66	585.965	566.212	670.195	1511.47	1534.8	1538.51
343	DFFA	6165.3	0.978946	0.0560813	17.4558	3.10821e-68	1.51233e-66	4060.19	4165.42	4225.23	8477.4	8500.76	7562.78
344	ZMAT3	2363.27	-1.24076	0.071085	-17.4547	3.17249e-68	1.53912e-66	3458.38	3530.91	2973.93	1459.7	1332.36	1424.36
345	PLK3	648.349	1.58262	0.0906934	17.4502	3.42869e-68	1.65859e-66	313.769	333.59	326.293	984.748	1033.18	898.519
346	GADD45A	1648.76	1.05558	0.0605839	17.4235	5.47415e-68	2.6404e-66	1079.88	1055.21	1078.32	2209.46	2266.8	2202.88
347	NID1	15459.1	-0.759736	0.0436101	-17.4211	5.70594e-68	2.74428e-66	19340.8	19721.4	19251.3	11680.6	11609.3	11151
348	CALCOCO1	1829.69	-1.20071	0.0689579	-17.4122	6.66569e-68	3.19666e-66	2451.75	2418.28	2780.22	1089.3	1147.86	1090.71
349	NSUN5	1434.03	1.3281	0.076278	17.4114	6.76493e-68	3.23495e-66	782.937	844.369	823.501	1919.71	2269.8	1963.86
350	CABLES2	1526.14	-1.13037	0.0649983	-17.3907	9.69731e-68	4.62396e-66	2083.54	2062.91	2139.03	953.881	1008.24	909.25
351	IER3	317.234	2.44901	0.140864	17.3857	1.05966e-67	5.03837e-66	85.1234	100.968	108.764	457.027	598.364	553.16
352	NAMPT	1441.82	1.2034	0.0692832	17.3692	1.41075e-67	6.68863e-66	869.05	902.772	847.326	2008.33	1890.83	2132.64
353	GPR173	636.583	-1.60736	0.092828	-17.3155	3.59695e-67	1.70055e-65	944.275	894.853	1036.89	303.689	305.166	334.627
354	EPM2AIP1	752.544	-1.54435	0.089201	-17.3132	3.74352e-67	1.76485e-65	1126.4	1163.11	1073.14	369.405	350.043	433.162
355	PRDM16	740.802	-1.4672	0.0847501	-17.312	3.81695e-67	1.7944e-65	1100.66	1129.45	1033.78	418.194	394.921	367.798
356	FADS3	2259	1.11027	0.0641491	17.3077	4.11872e-67	1.93082e-65	1360.98	1431.37	1498.88	2922.38	3276.05	3064.33
357	UTP4	1931.6	1.00501	0.0580739	17.3057	4.25851e-67	1.99076e-65	1271.9	1265.07	1317.6	2548.99	2592.91	2593.12
358	NIBAN1	1909.41	1.04073	0.0602075	17.2858	6.02216e-67	2.80737e-65	1188.76	1289.82	1268.92	2579.86	2533.08	2596.05
359	GRB10	2368.59	0.938733	0.0544473	17.2411	1.30477e-66	6.06555e-65	1631.2	1607.57	1633.54	3087.67	3140.42	3111.16
360	TCOF1	15471.7	0.946761	0.0549221	17.2382	1.37155e-66	6.35826e-65	10613.7	10156.2	10939.6	21192.5	21050.5	18877.7
361	NKTR	1118.41	-1.37995	0.0802867	-17.1877	3.28225e-66	1.51738e-64	1640.11	1676.86	1530.99	587.463	579.416	695.596
362	NCL	13387.9	0.781845	0.0455046	17.1817	3.64394e-66	1.67994e-64	9503.13	10150.2	9886.16	17225.6	16789.1	16773.3
363	CLUH	4756.12	1.00075	0.058262	17.1767	3.96979e-66	1.82512e-64	3097.1	3069.62	3342.69	6428.24	6652.82	5946.22
364	EIF4EBP2	10048.6	-0.754086	0.0439034	-17.176	4.01571e-66	1.84116e-64	12571.5	12890.2	12387.7	7430.92	7481.55	7529.61
365	RBBP7	4858.22	-0.825266	0.048066	-17.1694	4.4988e-66	2.057e-64	6138.78	6194.68	6300.04	3456.08	3472.51	3587.25
366	SRGAP3	320.92	-2.1053	0.122778	-17.1472	6.59139e-66	3.00556e-64	510.74	553.344	498.244	115.501	129.646	118.046
367	BCAP31	5646.52	0.92953	0.0542893	17.1218	1.02109e-65	4.6433e-64	3910.73	3649.69	4104.04	7297.49	7602.22	7314.98
368	FHL2	1093.98	1.48669	0.0869195	17.1042	1.38046e-65	6.26044e-64	542.414	574.131	610.116	1416.88	1656.47	1763.87
369	FURIN	8833.64	0.885424	0.0518222	17.0858	1.89359e-65	8.56424e-64	6196.19	5903.65	6515.5	11701.5	11649.2	11035.9
370	EIF2S2	4078.21	0.981953	0.0575228	17.0707	2.45356e-65	1.10669e-63	2625.96	2805.32	2793.69	5104.96	5430.16	5709.15
371	ETV1	179.809	3.38262	0.198417	17.048	3.61485e-65	1.6261e-63	27.7146	37.6155	29.0038	303.689	308.158	372.675
372	ADAMTS1	5532.6	-0.872352	0.0512455	-17.023	5.54517e-65	2.48772e-63	7110.77	7273.65	7084.18	3948.95	3709.86	4068.21
373	NOLC1	6769.7	0.803062	0.047246	16.9975	8.57388e-65	3.83618e-63	4874.8	5072.15	4850.89	8671.56	8745.1	8403.73
374	PAPLN	1248.34	-1.20813	0.0711041	-16.991	9.57748e-65	4.27376e-63	1792.54	1652.11	1782.7	756.733	791.836	714.132
375	GSPT1	13225.9	0.722115	0.0426753	16.9212	3.14221e-64	1.39841e-62	10031.7	10134.4	9783.61	16440	16368.3	16597.7
376	ZNF512	1657.35	-1.07965	0.0638887	-16.8989	4.58344e-64	2.03439e-62	2240.92	2336.12	2173.21	1036.52	1044.15	1113.15
377	TOB1	1726.48	-1.01466	0.0600733	-16.8903	5.30116e-64	2.34671e-62	2258.74	2345.03	2325.48	1133.11	1165.81	1130.71
378	MICALL1	8639.52	0.858773	0.050991	16.8417	1.2079e-63	5.33297e-62	6342.68	5874.95	6206.82	11499.3	11243.3	10670
379	FLAD1	1420.89	1.19609	0.0710699	16.8297	1.47725e-63	6.50496e-62	839.356	828.531	922.943	1939.63	2102.25	1892.65
380	SET	11639.9	0.754412	0.0448544	16.8191	1.76738e-63	7.76207e-62	8503.43	8845.58	8643.14	14732.4	14233.1	14881.7
381	EFNB2	2090.27	1.04444	0.0621826	16.7963	2.59867e-63	1.1383e-61	1404.54	1408.6	1281.35	2926.36	2731.53	2789.21
382	SMG5	6516.47	0.946063	0.0563544	16.7877	3.00142e-63	1.31128e-61	4379.89	4268.37	4712.08	8722.34	8924.61	8091.55
383	FAM111B	670.412	-1.64775	0.0983737	-16.7499	5.67349e-63	2.47219e-61	1014.55	1132.42	902.226	331.568	303.171	338.53
384	FBN2	7879.22	-0.911589	0.0544658	-16.7369	7.05642e-63	3.06679e-61	10528.6	10647.2	9690.38	5745.19	5287.55	5376.48
385	CCT2	6873.54	0.77136	0.0461093	16.729	8.06227e-63	3.49484e-61	5036.14	5066.21	5133.68	8720.35	8450.9	8833.97
386	NFKBIB	932.751	1.27748	0.0763684	16.7279	8.2137e-63	3.55126e-61	548.353	520.678	565.574	1321.29	1376.24	1264.36
387	HSPG2	4618.97	-0.985022	0.0589432	-16.7114	1.08302e-62	4.67044e-61	6358.52	6024.42	6028.65	3358.5	2936.97	3006.77
388	CRABP2	5477.66	0.95627	0.0572577	16.7012	1.28525e-62	5.52825e-61	3775.12	3429.94	3973.52	7274.59	7286.08	7126.69
389	PIDD1	2678.29	-1.18159	0.0707685	-16.6966	1.38818e-62	5.9556e-61	3685.05	3445.78	4022.21	1542.34	1785.12	1589.24
390	TAOK2	1835.62	-1.12211	0.0672212	-16.6928	1.47769e-62	6.3234e-61	2584.38	2330.18	2632.1	1195.84	1167.81	1103.39
391	CD320	2415.18	1.01322	0.0607235	16.6859	1.66055e-62	7.08772e-61	1560.92	1527.39	1713.3	3180.27	3322.92	3186.28
392	SH2B3	1097.79	1.15544	0.0692947	16.6743	2.0156e-62	8.58121e-61	685.936	697.866	656.729	1511.47	1509.87	1524.85
393	CCT7	24914.9	0.844392	0.0506464	16.6723	2.08391e-62	8.84947e-61	17654.2	16865.6	18956.1	31988.9	32609.9	31415
394	PCDH1	450.771	1.73445	0.104109	16.66	2.56031e-62	1.08449e-60	206.87	209.855	208.206	744.784	687.122	647.792
395	COL5A2	1430.95	-1.09472	0.065742	-16.6518	2.93536e-62	1.23708e-60	1943.98	1975.8	1927.72	967.821	881.59	888.763
396	RTL8C	2260.63	-1.02869	0.0617761	-16.6519	2.9291e-62	1.23708e-60	3108.98	2881.54	3111.7	1458.7	1569.71	1433.14
397	RCC1	3961.03	0.858355	0.0515803	16.6411	3.50823e-62	1.47478e-60	2851.63	2754.84	2842.37	5294.14	5024.27	4998.92
398	ZFAND1	858.938	1.44349	0.0869061	16.6097	5.92516e-62	2.48455e-60	438.484	514.738	431.95	1165.97	1283.49	1319
399	GEMIN5	1828.93	0.984692	0.0592878	16.6087	6.02994e-62	2.52215e-60	1222.41	1249.23	1211.95	2408.6	2492.19	2389.22
400	MAP2	327.695	-2.02047	0.121847	-16.582	9.40102e-62	3.92234e-60	487.975	563.243	526.212	122.471	131.64	134.631
401	PAQR5	951.313	1.25181	0.0755479	16.5697	1.15394e-61	4.80253e-60	568.149	585.02	534.499	1394.98	1297.45	1327.78
402	NARS	5524.47	0.922893	0.055727	16.561	1.33434e-61	5.53951e-60	3656.35	4011	3778.78	7167.05	6923.08	7610.58
403	BAHCC1	2255.45	-0.982521	0.0593783	-16.5468	1.68842e-61	6.99209e-60	3046.62	2850.86	3087.87	1547.32	1530.82	1469.24
404	EXOSC5	1018.6	1.31234	0.0793228	16.5443	1.76083e-61	7.2739e-60	575.078	557.303	622.546	1338.22	1524.83	1493.63
405	NAALAD2	458.845	-1.75903	0.106454	-16.5239	2.47096e-61	1.01822e-59	693.854	736.472	695.056	210.093	181.504	236.093
406	CARMIL2	991.555	1.31571	0.0796647	16.5156	2.83096e-61	1.16369e-59	554.292	555.323	595.614	1500.52	1446.05	1297.54
407	RHBDL3	463.057	-1.78414	0.108088	-16.5063	3.30528e-61	1.35533e-59	792.835	663.221	697.128	219.054	191.477	214.63
408	PRELID1	2388.01	1.06427	0.0644983	16.5008	3.6206e-61	1.48098e-59	1455.02	1520.46	1660.47	3091.65	3392.73	3207.74
409	COTL1	4767.39	0.920174	0.0557929	16.4927	4.14243e-61	1.69029e-59	3369.3	3074.57	3446.28	6326.68	6345.65	6041.83
410	IFRD1	989.624	1.31055	0.079471	16.4909	4.26707e-61	1.73691e-59	543.404	588.979	573.861	1311.34	1401.17	1518.99
411	PCNT	3689.57	-0.865553	0.0527427	-16.4109	1.59897e-60	6.49275e-59	4785.71	4891	4615.75	2678.44	2637.79	2528.73
412	AMOT	1470.51	-1.1888	0.0725166	-16.3935	2.12706e-60	8.61614e-59	2065.73	2135.17	1931.86	938.946	815.77	935.591
413	TRMT1	1537.45	1.15647	0.0706835	16.3612	3.61742e-60	1.46177e-58	939.326	876.045	1042.07	2135.78	2170.07	2061.42
414	AIMP2	987.711	1.26852	0.0775856	16.3499	4.35767e-60	1.75665e-58	582.006	574.131	582.148	1360.13	1507.88	1319.97
415	XPO5	4587.8	0.85934	0.0525902	16.3403	5.09836e-60	2.05028e-58	3202.02	3262.65	3316.79	6193.26	5883.92	5668.18
416	SPEN	11678.1	-0.920963	0.0564218	-16.3228	6.79169e-60	2.72467e-58	15372.7	16244	14234.7	8403.71	7730.87	8082.77
417	TPI1	34434.2	0.939576	0.0576373	16.3015	9.62392e-60	3.85164e-58	22694.3	22391.1	25720.2	44087.6	47452.3	44259.6
418	DNAJA1	1638.05	-1.00977	0.0620216	-16.2809	1.3487e-59	5.38478e-58	2224.1	2224.26	2118.31	1076.35	1118.94	1066.32
419	MRPL3	3186.84	0.921225	0.0566075	16.2739	1.51184e-59	6.02176e-58	2182.52	2275.74	2149.39	4070.42	4048.93	4394.06
420	SESN1	1183.12	-1.1739	0.0721367	-16.2732	1.52876e-59	6.07465e-58	1653.97	1727.34	1537.2	710.93	720.032	749.253
421	PA2G4	18841.9	0.930602	0.0572009	16.269	1.63754e-59	6.49144e-58	13131.8	12100.3	13670.1	25060.8	25904.2	23183.9
422	SALL2	3781.88	-0.819039	0.0503592	-16.2639	1.77946e-59	7.03728e-58	4807.49	4796.97	4877.82	2770.04	2784.39	2654.58
423	CSK	5508.01	0.8759	0.0538855	16.2548	2.06427e-59	8.14435e-58	3812.73	3773.43	4070.89	7032.63	7475.57	6882.79
424	DDX10	974.949	1.23135	0.0757599	16.2533	2.11576e-59	8.32781e-58	579.037	610.757	557.288	1328.26	1335.35	1439
425	ITGA5	5888.52	0.891152	0.0548303	16.2529	2.13009e-59	8.36448e-58	4132.44	3966.45	4278.06	7755.51	7984.18	7214.49
426	FXYD5	5870.57	0.963865	0.0593138	16.2503	2.22428e-59	8.71384e-58	4151.25	3668.5	4118.54	7670.88	8162.69	7451.56
427	LONP1	5169.53	0.941167	0.0579737	16.2344	2.88113e-59	1.12607e-57	3419.78	3371.54	3831.61	6770.77	7014.83	6608.65
428	RIN1	472.152	1.67514	0.103367	16.2057	4.59623e-59	1.79221e-57	238.543	198.966	238.246	690.021	755.934	711.205
429	FARSA	6129.15	0.92087	0.0569968	16.1565	1.02183e-58	3.97512e-57	4230.43	3963.49	4517.34	8058.21	8296.32	7709.11
430	CREBZF	2253.3	-0.90153	0.0558025	-16.1557	1.03478e-58	4.01617e-57	2912.01	2991.42	2902.45	1555.28	1554.75	1603.87
431	AHSA1	1982.73	0.975158	0.0603971	16.1458	1.21636e-58	4.70995e-57	1342.18	1272	1397.36	2669.47	2640.78	2574.58
432	KLF6	1945.61	1.06017	0.0657154	16.1327	1.50321e-58	5.80719e-57	1327.33	1301.69	1153.94	2717.27	2596.9	2576.53
433	SRSF6	2992.47	-0.838182	0.0519769	-16.1261	1.67369e-58	6.45086e-57	3792.94	3899.14	3822.29	2121.84	2138.16	2180.44
434	CCT4	13670.9	0.7512	0.0465933	16.1225	1.77376e-58	6.82081e-57	9872.33	10079	10619.5	16806.4	17407.4	17240.6
435	SNRPB	17260	0.814598	0.0506373	16.0869	3.15124e-58	1.20899e-56	12457.7	11819.2	13262	21634.6	22393.8	21992.7
436	PLOD1	7382.49	0.854966	0.0531489	16.0862	3.18584e-58	1.21946e-56	5181.64	5040.48	5549.05	9671.24	9747.36	9105.18
437	PTP4A1	6484.06	0.803112	0.0499318	16.0842	3.29347e-58	1.25778e-56	4794.62	4894.96	4483.16	8285.23	8161.69	8284.71
438	NAB2	1775.66	1.17003	0.0729024	16.0493	5.77783e-58	2.20151e-56	1071.96	993.841	1212.98	2383.71	2572.97	2418.49
439	DCUN1D5	2054.98	0.976247	0.0608826	16.0349	7.2884e-58	2.77076e-56	1391.67	1356.14	1407.72	2666.49	2632.8	2875.06
440	PLEKHB1	1698.5	-1.00523	0.0627123	-16.0293	7.98162e-58	3.02739e-56	2299.32	2210.41	2292.34	1174.93	1140.88	1073.15
441	TOMM34	3532.26	0.891592	0.0556242	16.0289	8.03472e-58	3.04062e-56	2492.33	2334.14	2596.88	4507.54	4685.19	4577.47
442	RNF213	4002.48	-0.942322	0.0588074	-16.0239	8.70673e-58	3.28748e-56	5343.97	5468.1	4982.44	2887.53	2748.49	2584.34
443	TTLL12	7049.5	0.865874	0.0540494	16.02	9.26007e-58	3.48852e-56	5180.65	4704.91	5100.53	9287.9	9331.49	8691.53
444	INKA2	375.237	-1.79124	0.111846	-16.0152	1.00066e-57	3.76127e-56	554.292	622.635	569.718	174.248	170.534	159.997
445	HS3ST3A1	894.907	1.19635	0.0747314	16.0087	1.11087e-57	4.16615e-56	554.292	546.415	530.356	1224.71	1281.5	1232.17
446	YBX1	33897.4	0.658146	0.0412072	15.9717	2.01384e-57	7.53563e-56	26406.1	25705.2	26779.8	41357.4	41824.7	41311.4
447	MRPL2	1903.49	1.03388	0.0648584	15.9406	3.31086e-57	1.23613e-55	1252.11	1168.06	1327.96	2541.03	2655.74	2476.05
448	POLH	2562.31	-0.871656	0.054699	-15.9355	3.59345e-57	1.33864e-55	3301.99	3299.27	3339.58	1799.23	1871.88	1761.92
449	RBM5	1378.86	-1.01974	0.0640008	-15.9333	3.72156e-57	1.38327e-55	1831.14	1824.35	1885.25	895.135	908.517	928.762
450	SEMA3C	543.069	-1.77456	0.111397	-15.93	3.92183e-57	1.45448e-55	875.979	930.488	714.737	269.835	227.378	239.995
451	CDON	1833.81	-1.01399	0.0636669	-15.9264	4.15334e-57	1.53692e-55	2506.19	2556.86	2295.45	1227.7	1217.67	1199
452	TRIM8	2411.86	0.968862	0.0608387	15.9251	4.24308e-57	1.56666e-55	1584.68	1670.92	1637.68	3133.47	3393.72	3050.67
453	NPNT	792.401	-1.28527	0.0809193	-15.8833	8.26739e-57	3.04579e-55	1129.37	1181.92	1059.68	462.005	470.713	450.723
454	CLU	11135.7	0.932441	0.0587861	15.8616	1.16868e-56	4.29604e-55	7750.18	7150.9	8071.35	14299.3	15633.3	13909
455	PKMYT1	4753.43	0.902797	0.0569181	15.8613	1.1736e-56	4.30467e-55	3352.47	3109.22	3477.35	6348.59	6328.7	5904.27
456	MAP2K1	2090.87	0.925013	0.0583798	15.8447	1.52846e-56	5.59395e-55	1415.42	1426.42	1486.45	2652.55	2764.44	2799.94
457	HOXB13	924.592	-1.25213	0.0790495	-15.8399	1.65152e-56	6.0311e-55	1278.83	1264.08	1364.22	576.511	562.463	501.453
458	SCARB1	4374.11	0.896619	0.0566171	15.8365	1.74146e-56	6.34568e-55	3093.15	2878.58	3199.74	5660.56	5930.79	5481.84
459	CDKN2C	1973.59	-0.97395	0.0615885	-15.8138	2.49813e-56	9.08307e-55	2621.01	2592.5	2633.13	1266.53	1419.12	1309.24
460	LYAR	700.459	1.36555	0.0864189	15.8015	3.03882e-56	1.1025e-54	370.188	394.963	410.197	952.886	1006.25	1068.27
461	CTSC	2282.22	0.927147	0.0587368	15.7848	3.96103e-56	1.43396e-54	1549.05	1562.03	1608.68	3021.95	2851.21	3100.43
462	EIF4A1	33860.8	0.733604	0.0465409	15.7625	5.63201e-56	2.03447e-54	25744.9	24252.1	26301.3	43204.5	42274.4	41387.5
463	SMYD5	1701.57	1.02818	0.0652311	15.7621	5.66914e-56	2.04346e-54	1143.23	1067.09	1148.76	2294.09	2388.47	2167.76
464	ALG3	3600.4	1.03213	0.0655169	15.7536	6.49194e-56	2.335e-54	2201.33	2334.14	2559.59	4561.31	5153.91	4792.1
465	LY6K	271.254	2.17099	0.137843	15.7497	6.90141e-56	2.47694e-54	103.93	78.2006	113.944	438.108	434.812	458.527
466	ALPK2	187.123	2.64494	0.167988	15.7449	7.45046e-56	2.66826e-54	50.4801	51.4738	52.8284	306.676	351.04	310.238
467	HSP90AB1	29154.2	0.707591	0.0449866	15.729	9.57804e-56	3.42287e-54	21805.4	21650.7	22978.3	36521.3	36758.5	35211
468	RAD23B	10499.2	0.731582	0.0465242	15.7248	1.02335e-55	3.64928e-54	8028.32	8035.86	7613.5	13305.5	12771.1	13240.7
469	SH3BGRL3	4047.1	0.925269	0.0588484	15.7229	1.05312e-55	3.74745e-54	2759.58	2687.53	2929.39	5236.39	5638.59	5031.12
470	MN1	2131.7	-0.922037	0.0586946	-15.7091	1.311e-55	4.65516e-54	2897.16	2697.43	2777.12	1498.53	1482.95	1437.04
471	CAPN2	7012.55	0.762809	0.0485688	15.7058	1.38112e-55	4.89374e-54	5139.08	5292.9	5169.93	9145.51	8499.77	8828.12
472	FGFRL1	5505.87	0.8598	0.0547793	15.6957	1.61859e-55	5.72302e-54	4006.74	3766.5	3963.16	6804.62	7530.42	6963.76
473	ZFHX2	564.163	-1.45943	0.0930098	-15.6911	1.73877e-55	6.13496e-54	800.753	866.146	815.214	310.659	315.139	277.068
474	LRRC59	8984.22	0.809871	0.0516634	15.6759	2.20948e-55	7.77934e-54	6551.53	6194.68	6834.54	11491.4	11777.8	11055.4
475	C19orf48	6315.49	0.909737	0.058129	15.6503	3.30606e-55	1.16158e-53	4407.61	4101.08	4655.11	8132.88	8682.27	7913.99
476	GLRX	753.044	1.34711	0.0860812	15.6493	3.35709e-55	1.17703e-53	410.77	408.821	455.774	1009.64	1083.04	1150.22
477	ESRRA	1607.91	1.04197	0.0666127	15.6422	3.75749e-55	1.31465e-53	1043.26	978.993	1132.18	2176.6	2174.06	2142.4
478	STX1A	442.138	1.62297	0.10382	15.6326	4.36419e-55	1.52372e-53	203.9	224.703	221.672	625.3	705.073	672.182
479	NOC4L	2220.24	1.01718	0.0652456	15.59	8.50804e-55	2.96432e-53	1413.44	1406.62	1585.89	2948.27	3120.47	2846.77
480	DAZAP1	7063.72	0.802885	0.0516149	15.5553	1.46433e-54	5.09128e-53	5135.12	4934.56	5372.96	9115.64	9197.86	8626.17
481	CLPTM1L	9664.4	0.820559	0.0527815	15.5464	1.68416e-54	5.84344e-53	6936.56	6625.28	7402.19	12406.4	12691.3	11924.6
482	JUN	9346.09	0.759745	0.0488956	15.5381	1.91558e-54	6.63259e-53	6711.88	6890.56	7219.88	11356	11990.2	11908.1
483	SPHK1	780.925	1.35022	0.0869307	15.5322	2.10159e-54	7.26159e-53	426.607	396.942	497.208	1130.12	1102.99	1131.68
484	ITPR3	5229.9	0.741101	0.0478766	15.4794	4.7785e-54	1.64769e-52	3941.41	3866.48	3938.3	6705.05	6534.14	6394.02
485	RAB5B	5021.13	-0.734435	0.0474465	-15.4792	4.79248e-54	1.64911e-52	6157.59	6261.99	6397.41	3786.65	3784.66	3738.46
486	ABCE1	1970.94	1.15055	0.0743424	15.4764	5.00831e-54	1.71983e-52	1230.33	1335.35	1106.29	2711.29	2536.07	2906.28
487	TSR1	1426.38	0.990097	0.0639929	15.472	5.36322e-54	1.83792e-52	936.357	966.124	963.341	1926.68	1928.73	1837.04
488	DIDO1	4116.79	-0.785572	0.0508742	-15.4415	8.61143e-54	2.945e-52	5325.16	5152.33	5154.39	2999.05	3126.45	2943.36
489	EPHB3	1065.45	-1.08772	0.0705223	-15.4238	1.13172e-53	3.86244e-52	1457.98	1396.72	1492.66	692.012	680.141	673.157
490	BMP6	605.508	1.36006	0.0881802	15.4237	1.13413e-53	3.86275e-52	350.391	338.539	329.401	908.079	867.628	839.008
491	KATNB1	2447.53	0.983399	0.0637599	15.4235	1.13825e-53	3.86888e-52	1610.42	1538.28	1784.77	3239.01	3350.84	3161.89
492	GRK6	4615.93	0.893101	0.0579502	15.4115	1.36963e-53	4.6459e-52	3258.44	3015.18	3420.38	5858.7	6266.87	5875.98
493	SRSF1	5398.96	-0.720815	0.0467805	-15.4085	1.43611e-53	4.86152e-52	6714.85	6603.5	6842.83	4063.45	4107.77	4061.38
494	ANXA2	12271.7	0.768017	0.0498576	15.4042	1.53366e-53	5.18124e-52	9208.17	8645.62	9387.91	15484.1	14936.2	15968.5
495	GPC3	1389.48	-1.11373	0.0723015	-15.404	1.53932e-53	5.18983e-52	1912.31	1842.17	1947.4	837.384	968.353	829.252
496	HSPH1	907.202	1.1918	0.0773759	15.4028	1.56845e-53	5.2774e-52	562.21	587	507.567	1269.52	1251.58	1265.34
497	PSMG1	1534.67	1.03761	0.0673709	15.4015	1.59998e-53	5.37266e-52	1041.28	990.871	984.058	1993.39	1996.54	2201.91
498	ZNF703	9735.29	-0.93287	0.0606062	-15.3923	1.84319e-53	6.17691e-52	13483.1	12090.4	12758.6	6958.95	6997.87	6122.8
499	NNT	3369.76	-0.879508	0.0571419	-15.3916	1.8629e-53	6.23046e-52	4500.65	4453.48	4144.44	2398.64	2265.81	2455.56
500	XRCC6	16914.5	0.73187	0.0475948	15.3771	2.33139e-53	7.7817e-52	12483.4	12336.9	13322.1	21599.7	21151.2	20593.7
501	HGSNAT	2102.84	-0.868391	0.0564869	-15.3733	2.47224e-53	8.23539e-52	2676.44	2744.94	2730.5	1459.7	1510.87	1494.6
502	MAP2K3	2283.55	1.01062	0.0657454	15.3717	2.53374e-53	8.42342e-52	1534.2	1410.58	1600.39	2936.32	3250.12	2969.7
503	GAR1	702.749	1.32307	0.0860893	15.3686	2.65894e-53	8.82208e-52	425.617	366.256	412.269	986.739	1045.14	980.468
504	KLK6	288.234	2.03914	0.132809	15.3539	3.33377e-53	1.10392e-51	108.879	124.725	104.621	475.945	499.634	415.601
505	PTGES2	2256.49	0.956285	0.06236	15.3349	4.46898e-53	1.47689e-51	1494.61	1472.94	1637.68	2892.51	3111.5	2929.7
506	ICAM1	468.21	1.6844	0.109845	15.3344	4.50325e-53	1.48527e-51	189.053	240.541	237.21	748.767	742.969	650.719
507	RRP7A	3316.5	0.894978	0.0584965	15.2997	7.68273e-53	2.52894e-51	2220.14	2270.79	2468.43	4259.61	4496.71	4183.33
508	RIPOR1	4123.54	0.854229	0.0558549	15.2937	8.42124e-53	2.76658e-51	3048.6	2798.39	2964.6	5530.12	5326.44	5073.07
509	IFRD2	1692.26	1.19118	0.0779169	15.2878	9.22327e-53	3.02411e-51	1025.44	910.691	1157.05	2308.03	2478.23	2274.1
510	PTGES3	13690.2	0.684954	0.0448251	15.2806	1.03006e-52	3.37072e-51	10327.6	10440.3	10732.4	16466.9	17350.6	16823.1
511	CLPP	4151.38	0.893224	0.0584927	15.2707	1.1991e-52	3.91619e-51	2815.01	2817.2	3085.8	5180.63	5702.41	5307.21
512	TMEM255A	457.742	-1.56593	0.102649	-15.2552	1.51942e-52	4.95267e-51	692.865	688.957	671.231	251.912	203.444	238.044
513	P2RX5	268.299	2.13271	0.139836	15.2515	1.60899e-52	5.23438e-51	97.001	82.1602	120.159	430.143	464.73	415.601
514	WDR43	1620.17	1.15608	0.0759177	15.228	2.30383e-52	7.48028e-51	1071.96	1041.36	897.047	2133.79	2171.07	2405.81
515	ARHGEF17	3038.21	-0.878323	0.0576971	-15.223	2.48855e-52	8.06434e-51	3903.8	3832.82	4069.86	2246.3	2153.11	2023.37
516	SLC5A6	2069.56	0.930479	0.0611388	15.2191	2.64023e-52	8.53932e-51	1444.13	1352.18	1477.12	2703.33	2814.31	2626.29
517	AFG3L2	2579.65	0.852704	0.0560688	15.2082	3.1216e-52	1.00767e-50	1860.84	1784.76	1870.75	3293.78	3436.61	3231.15
518	PDGFB	311.885	1.85797	0.122247	15.1985	3.61747e-52	1.16548e-50	151.44	128.685	124.302	476.941	480.686	509.258
519	SIAH2	1260.53	1.01368	0.0667274	15.1914	4.03213e-52	1.29657e-50	851.234	809.723	844.218	1706.63	1716.31	1635.09
520	ITGB5	2659.71	0.876866	0.0577516	15.1834	4.55552e-52	1.46206e-50	1862.82	1790.7	1973.3	3441.14	3532.34	3357.98
521	VGF	171.655	2.67346	0.176227	15.1706	5.53705e-52	1.77366e-50	54.4394	43.5548	41.434	315.637	280.234	294.628
522	AAMP	3349.09	0.957951	0.0631897	15.1599	6.51326e-52	2.08237e-50	2236.96	2097.56	2495.36	4502.56	4410.94	4351.13
523	WNT7B	409.559	1.74316	0.115072	15.1484	7.75966e-52	2.47612e-50	185.094	174.219	206.134	703.96	613.324	574.623
524	SRPRB	1502.64	1.01553	0.0671086	15.1326	9.86544e-52	3.14207e-50	973.97	941.377	1069	2050.15	2016.49	1964.84
525	DMKN	1844.28	1.00762	0.0665989	15.1297	1.03136e-51	3.27855e-50	1242.21	1119.56	1314.49	2415.57	2481.22	2492.63
526	SIGMAR1	6895.82	0.797238	0.0527269	15.1201	1.19289e-51	3.78481e-50	4895.58	4929.61	5288.02	8633.72	9155.97	8472.03
527	FCHO1	1011.69	1.17658	0.0779043	15.1028	1.55096e-51	4.91157e-50	663.17	579.081	619.439	1381.04	1487.93	1339.49
528	EIF3J	1571.64	0.994563	0.0659054	15.0908	1.86286e-51	5.88812e-50	1033.36	1080.95	1036.89	1977.46	2101.26	2199.96
529	ERO1A	2134.95	0.898495	0.0595666	15.0839	2.06807e-51	6.5244e-50	1471.84	1547.18	1453.3	2714.28	2727.54	2895.55
530	SH3GL1	6579.87	0.768595	0.0511207	15.0349	4.33616e-51	1.3654e-49	4923.3	4626.71	5052.88	8252.37	8521.71	8102.28
531	DNPEP	1316.06	1.01686	0.0678572	14.9853	9.16503e-51	2.88051e-49	832.427	871.096	908.441	1726.55	1832.99	1724.84
532	NFATC4	908.788	-1.15546	0.0771347	-14.9797	9.96446e-51	3.12588e-49	1262	1186.87	1314.49	560.58	584.403	544.379
533	GTPBP4	1005.87	1.07551	0.071855	14.9678	1.19189e-50	3.73199e-49	649.313	674.109	618.403	1360.13	1376.24	1357.05
534	BCORL1	3099.06	-0.807172	0.0539282	-14.9675	1.19683e-50	3.74044e-49	4010.7	3960.52	3860.62	2325.96	2269.8	2166.79
535	QSOX2	3939.1	0.769565	0.0514519	14.957	1.40239e-50	4.37468e-49	2846.68	2851.85	3040.22	4994.44	4986.37	4915.02
536	PPP1R3C	296.309	1.8409	0.123113	14.9529	1.49091e-50	4.64213e-49	125.705	125.715	136.732	466.984	439.798	482.917
537	SRSF2	4479.3	-0.820801	0.0549679	-14.9324	2.0292e-50	6.30639e-49	5806.2	5521.56	5832.88	3122.52	3435.61	3157.01
538	PROSER1	2882.59	0.800443	0.0536694	14.9143	2.65925e-50	8.24911e-49	2071.66	2165.86	2070.67	3713.96	3696.9	3576.51
539	CHPF	3470.99	0.889521	0.0596534	14.9115	2.77509e-50	8.59249e-49	2375.54	2357.9	2567.87	4353.2	4796.89	4374.55
540	CACNA1G	810.542	-1.16582	0.0782146	-14.9054	3.0406e-50	9.39715e-49	1113.53	1129.45	1120.79	528.717	495.645	475.112
541	CTNNAL1	3219.37	0.807244	0.0541733	14.9011	3.23969e-50	9.99393e-49	2397.31	2401.45	2225.01	4150.08	4041.95	4100.41
542	SLC44A5	494.11	-1.65891	0.111353	-14.8977	3.40868e-50	1.04959e-48	751.263	840.409	659.837	211.089	252.31	249.751
543	TUBA1B	51644.9	0.600109	0.0403002	14.891	3.7715e-50	1.15916e-48	40456.4	40884.1	41827.7	62313.9	62654.7	61732.4
544	NGFR	1142.18	1.05203	0.0707115	14.8778	4.59688e-50	1.41025e-48	786.896	721.624	720.952	1547.32	1581.68	1494.6
545	ADRB2	207.372	-2.23758	0.150422	-14.8754	4.763e-50	1.45853e-48	343.463	322.701	360.476	72.6862	68.8119	76.096
546	KPNA4	2613.55	0.958422	0.0644371	14.8738	4.87864e-50	1.4912e-48	1820.25	1881.76	1625.25	3515.82	3290.01	3548.22
547	PHPT1	4953.68	-0.825427	0.0555323	-14.8639	5.65324e-50	1.72481e-48	6334.76	5947.21	6718.53	3516.82	3635.06	3569.68
548	NOMO1	8036.68	0.792729	0.0534059	14.8435	7.66729e-50	2.33502e-48	5685.45	5873.96	6088.73	10156.1	10750.6	9665.17
549	PSPH	851.404	1.16312	0.0784131	14.8332	8.93731e-50	2.71685e-48	506.781	525.627	544.857	1119.17	1181.77	1230.22
550	TFAP4	1708.54	1.0625	0.071747	14.809	1.2808e-49	3.88641e-48	1145.21	1003.74	1170.51	2423.54	2336.61	2171.66
551	PPM1D	1161.06	-1.07682	0.0727655	-14.7985	1.49716e-49	4.53468e-48	1608.44	1641.22	1476.09	764.698	710.059	765.838
552	NXPH4	2791.65	0.916539	0.061956	14.7934	1.61657e-49	4.88748e-48	1961.8	1822.37	2016.8	3604.44	3869.42	3475.05
553	MAP7D1	7974.73	0.859433	0.0580966	14.7932	1.62121e-49	4.89264e-48	5855.7	5322.59	5823.55	10705.8	10576.1	9564.69
554	PRSS23	3324.29	-0.777731	0.0525888	-14.7889	1.7275e-49	5.20403e-48	4275.96	4225.8	4095.75	2374.75	2509.14	2464.34
555	UCK2	2259.07	0.845471	0.0571753	14.7873	1.7678e-49	5.31584e-48	1656.94	1561.04	1628.36	2978.14	2884.12	2845.8
556	EDA2R	1146.08	-1.01633	0.0687748	-14.7776	2.04279e-49	6.13168e-48	1511.43	1582.82	1507.16	752.75	781.863	740.473
557	SLC12A4	2114.48	-0.936311	0.0633707	-14.7751	2.11952e-49	6.35056e-48	2850.64	2579.63	2902.45	1483.59	1454.03	1416.56
558	TIMM44	1734.62	0.952631	0.064525	14.7637	2.50939e-49	7.50523e-48	1164.01	1120.55	1261.67	2223.4	2338.61	2299.47
559	GPATCH4	807.923	1.12766	0.0764263	14.7548	2.86453e-49	8.55209e-48	502.822	517.708	501.352	1116.18	1110.96	1098.51
560	PAEP	122.407	4.94386	0.336162	14.7067	5.83485e-49	1.73889e-47	4.94903	9.89881	8.28681	212.084	256.299	242.922
561	CCT6A	4477.58	0.721446	0.0491147	14.689	7.58189e-49	2.25551e-47	3405.92	3333.92	3402.77	5534.11	5461.07	5727.69
562	KNDC1	788.275	-1.16588	0.0793965	-14.6843	8.12341e-49	2.41231e-47	1080.87	1068.08	1122.86	465.988	478.692	513.16
563	HDHD5	2095.94	0.919478	0.0626641	14.6731	9.58398e-49	2.84098e-47	1437.2	1390.78	1521.66	2750.13	2867.16	2608.73
564	MRPS10	1456.98	0.965735	0.0659048	14.6535	1.27989e-48	3.78724e-47	952.194	1036.41	971.628	1905.77	1876.87	1998.98
565	GEM	339.376	1.65569	0.113023	14.6491	1.36423e-48	4.02966e-47	156.389	160.361	174.023	511.79	518.583	515.112
566	SNRPA1	1376.86	1.01946	0.0697074	14.6249	1.94862e-48	5.74568e-47	885.877	871.096	972.664	1875.9	1753.21	1902.4
567	PNO1	689.825	1.34177	0.0918393	14.61	2.42524e-48	7.13843e-47	356.33	438.517	376.014	939.942	982.315	1045.83
568	ZSWIM8	2118.87	-0.924649	0.0633033	-14.6066	2.54774e-48	7.48579e-47	2751.66	2627.15	2948.03	1478.62	1503.89	1403.87
569	TFRC	3271.23	0.951909	0.065171	14.6063	2.55919e-48	7.5062e-47	2305.26	2317.31	2065.49	4461.74	3979.12	4498.45
570	RHEBL1	203.906	2.22862	0.152604	14.6039	2.65313e-48	7.76809e-47	77.2049	60.3828	77.6888	339.534	330.098	338.53
571	GLRX3	4027.09	0.861264	0.0590073	14.5959	2.98316e-48	8.71907e-47	2777.4	2760.78	3041.26	4981.49	5110.03	5491.6
572	HSP90AA1	13556.1	0.915514	0.0627686	14.5855	3.47175e-48	1.01294e-46	9404.15	10030.5	8745.69	18074	16254.6	18827.9
573	TRAP1	15713.2	0.764272	0.0524004	14.5852	3.48736e-48	1.01572e-46	11507.5	11116.4	12314.2	20013.6	20432.2	18895.2
574	ABCA5	477.606	-1.51326	0.103858	-14.5705	4.3269e-48	1.25804e-46	729.487	721.624	671.231	233.99	226.381	282.921
575	PDCD2L	635.993	1.46297	0.10046	14.5627	4.85318e-48	1.4086e-46	297.932	319.732	398.803	895.135	987.301	917.055
576	CCNG1	5329.26	-0.819716	0.0563919	-14.536	7.16085e-48	2.07478e-46	6620.82	7219.2	6571.44	3726.91	3782.66	4054.55
577	ATF5	1157.46	1.08983	0.0749794	14.5351	7.25883e-48	2.09953e-46	744.334	698.856	776.888	1667.8	1587.66	1469.24
578	FOXC1	2012.1	-0.857334	0.059038	-14.5217	8.82675e-48	2.54861e-46	2533.9	2646.94	2597.91	1401.95	1490.92	1400.95
579	ALOX5	423.91	-1.55647	0.107224	-14.5161	9.57807e-48	2.76077e-46	616.649	646.393	634.976	198.144	246.327	200.972
580	PXN	6647.25	0.747469	0.0515214	14.5079	1.07933e-47	3.10568e-46	5058.9	4766.28	5063.24	8517.22	8530.68	7947.16
581	CARM1	9376.09	0.760928	0.0524557	14.5061	1.10843e-47	3.17844e-46	7112.75	6726.24	7038.61	11796.1	12425	11157.8
582	HSPA4	3879.57	0.778876	0.0536926	14.5062	1.1066e-47	3.17844e-46	2771.46	2941.93	2857.91	4776.38	4808.86	5120.87
583	DPAGT1	2078.76	0.859699	0.0592801	14.5023	1.17101e-47	3.35213e-46	1474.81	1414.54	1542.38	2653.54	2741.51	2645.8
584	AHRR	1693.94	-0.903918	0.0623863	-14.489	1.42132e-47	4.06173e-46	2156.79	2176.75	2290.27	1225.71	1166.81	1147.29
585	TRNP1	1835.26	0.927865	0.0640563	14.4851	1.50415e-47	4.29107e-46	1276.85	1199.74	1317.6	2345.87	2529.09	2342.39
586	KCTD12	1395.33	-1.02766	0.071064	-14.461	2.13653e-47	6.08474e-46	1925.17	1948.09	1743.34	964.834	868.626	921.933
587	WSCD1	1573.02	0.909453	0.0629123	14.4559	2.30135e-47	6.54298e-46	1131.35	1067.09	1080.39	2113.87	2046.41	1998.98
588	FAF1	3038.12	0.754027	0.0521894	14.4479	2.58393e-47	7.33388e-46	2264.68	2219.31	2301.66	3766.74	3787.65	3888.7
589	NOP14	4842	0.819889	0.0567575	14.4455	2.67719e-47	7.58568e-46	3371.28	3620.99	3513.61	6121.57	6569.04	5855.49
590	POGLUT3	2011.52	-0.978475	0.0678153	-14.4285	3.4233e-47	9.68329e-46	2668.52	2841.95	2495.36	1391.99	1263.55	1407.78
591	PDP1	741.607	1.24556	0.0863553	14.4237	3.67127e-47	1.03672e-45	458.28	457.325	403.982	1037.52	982.315	1110.22
592	MYC	1116.44	1.05575	0.0732234	14.4182	3.97842e-47	1.12155e-45	706.722	758.249	710.594	1431.82	1597.63	1493.63
593	SLC35F2	1108.39	1.00191	0.0695022	14.4155	4.1316e-47	1.16277e-45	703.752	760.229	750.992	1458.7	1486.94	1489.73
594	FTSJ1	2656.43	0.842129	0.058441	14.4099	4.48338e-47	1.25965e-45	1799.47	1891.66	2016.8	3350.53	3467.52	3412.61
595	SGSM2	809.626	-1.14842	0.0797	-14.4093	4.52538e-47	1.26931e-45	1103.63	1060.16	1183.98	505.816	506.615	497.551
596	RAC2	1744.87	0.954525	0.0662608	14.4056	4.77304e-47	1.33653e-45	1149.17	1128.46	1286.53	2266.22	2374.51	2264.34
597	POLR3K	1485.29	0.965523	0.0670597	14.398	5.32986e-47	1.48995e-45	1057.11	930.488	1030.67	1949.58	1998.54	1945.33
598	ZNF219	1241.08	-0.981039	0.06814	-14.3974	5.37235e-47	1.49932e-45	1658.92	1584.8	1698.8	847.341	854.664	801.935
599	HAGHL	348.404	1.70097	0.118149	14.3968	5.42222e-47	1.51071e-45	157.379	154.421	180.238	483.911	554.484	559.989
600	DHRS2	2787.14	0.942933	0.0655207	14.3914	5.86206e-47	1.63053e-45	1797.49	1834.25	2091.38	3511.84	3823.55	3664.32
601	RBM12	2286.49	-0.877194	0.0609834	-14.3841	6.50806e-47	1.8072e-45	3020.89	3081.5	2780.22	1611.04	1568.71	1656.55
602	PLXNB1	740.23	-1.20889	0.0840478	-14.3834	6.58208e-47	1.82472e-45	1036.33	1018.59	1045.17	490.88	434.812	415.601
603	GRPEL1	1252.54	0.947624	0.0659218	14.375	7.42928e-47	2.05617e-45	875.979	834.47	855.613	1623.99	1676.42	1648.75
604	COLGALT1	6892.02	0.810703	0.0564009	14.3739	7.54405e-47	2.08448e-45	5012.38	4659.37	5343.95	9050.92	8750.08	8535.44
605	QPRT	3874.94	-0.852835	0.0596049	-14.3081	1.94646e-46	5.36935e-45	4959.92	4727.67	5276.62	2743.16	2914.03	2628.24
606	C21orf58	1159.61	-1.27657	0.0892612	-14.3015	2.14248e-46	5.90031e-45	1631.2	1480.86	1812.74	668.115	756.931	607.793
607	WSB1	1432.96	-0.907772	0.0635934	-14.2746	3.14922e-46	8.65855e-45	1897.46	1889.68	1821.03	1000.68	1018.22	970.712
608	MRPL17	1888.15	0.999384	0.0700345	14.2699	3.37135e-46	9.25403e-45	1213.5	1186.87	1377.68	2482.28	2665.71	2402.88
609	TSPYL1	2952.5	-0.769978	0.0539884	-14.2619	3.77888e-46	1.03556e-44	3803.83	3688.3	3674.16	2202.49	2242.87	2103.37
610	STX3	2736.49	0.763333	0.0535521	14.254	4.232e-46	1.15783e-44	2029.1	2072.81	1984.69	3410.28	3511.4	3410.66
611	GVQW3	575.927	-1.24769	0.0875899	-14.2447	4.83781e-46	1.32141e-44	818.57	797.844	815.214	345.508	332.092	346.335
612	TXNDC5	8182.16	0.705686	0.0495525	14.2412	5.08596e-46	1.38692e-44	6034.85	6160.03	6465.78	9768.82	10385.6	10277.8
613	ETF1	3489.93	0.789098	0.0554486	14.2312	5.86886e-46	1.59781e-44	2588.34	2683.57	2403.17	4396.02	4414.93	4453.57
614	GOT2	7198.12	0.670644	0.047132	14.2291	6.04852e-46	1.64403e-44	5449.87	5459.2	5755.19	8903.56	8920.62	8700.31
615	TAGLN2	20794.6	0.688994	0.0484391	14.2239	6.50927e-46	1.76639e-44	15798.3	15206.6	16760.1	25438.2	26228.3	25336.1
616	NUMA1	13392.9	-0.724992	0.0510435	-14.2034	8.72478e-46	2.36377e-44	16659.4	16194.5	17212.7	10190	10562.1	9538.35
617	PPP1R10	1721.64	-0.984704	0.0693782	-14.1933	1.00827e-45	2.72723e-44	2319.12	2193.58	2349.31	1132.11	1262.55	1073.15
618	OGFOD1	1383.1	0.911827	0.0642641	14.1887	1.07579e-45	2.90516e-44	945.265	961.175	973.7	1862.96	1771.16	1784.35
619	NFYA	1286.53	-1.01322	0.0714959	-14.1718	1.37015e-45	3.69409e-44	1663.86	1858.01	1639.75	866.26	834.718	856.568
620	TMEM205	2150.24	0.913187	0.0644443	14.1702	1.40135e-45	3.77212e-44	1471.84	1417.51	1585.89	2696.36	2970.88	2758.97
621	SELENBP1	1192.51	-1.07695	0.0760036	-14.1697	1.41149e-45	3.7933e-44	1641.1	1471.95	1741.27	771.668	778.871	750.229
622	PIANP	1136.27	-0.990982	0.069964	-14.1642	1.52647e-45	4.09569e-44	1564.88	1454.14	1516.49	757.728	786.849	737.546
623	PURB	1372.55	-0.981685	0.0693225	-14.1611	1.59399e-45	4.27e-44	1856.88	1896.61	1713.3	922.019	882.588	963.883
624	CCDC14	1164.24	-1.14188	0.080727	-14.145	2.0062e-45	5.36562e-44	1595.57	1733.28	1478.16	726.862	667.176	784.375
625	SLC6A8	4910.67	0.79756	0.0563859	14.1447	2.01493e-45	5.38035e-44	3704.85	3351.74	3704.2	6226.12	6473.31	6003.78
626	LIG1	3364.37	-0.815073	0.0576501	-14.1383	2.20594e-45	5.88098e-44	4190.84	4108.01	4572.24	2445.44	2492.19	2377.51
627	GOT1	2556.23	0.83871	0.0593277	14.1369	2.24971e-45	5.9881e-44	1750.97	1801.58	1948.44	3200.18	3375.77	3260.42
628	FZD1	1152.39	-0.946703	0.0670324	-14.1231	2.73773e-45	7.27547e-44	1505.5	1528.38	1518.56	779.634	802.806	779.497
629	MAFB	1926.02	-0.883454	0.0625551	-14.1228	2.74837e-45	7.29215e-44	2510.15	2523.21	2460.15	1388.01	1415.13	1259.49
630	OGT	3907.68	-0.781844	0.0553713	-14.12	2.85914e-45	7.574e-44	4886.67	4979.1	4958.62	2924.37	2686.66	3010.67
631	PRNP	1973.84	0.871224	0.061703	14.1196	2.87529e-45	7.60471e-44	1335.25	1471.95	1378.72	2464.36	2588.92	2603.85
632	DIP2A	1329.76	-0.922091	0.0653091	-14.1189	2.90541e-45	7.66588e-44	1764.82	1697.65	1759.91	924.01	943.421	888.763
633	SPATA18	425.019	-1.45115	0.102781	-14.1188	2.9076e-45	7.66588e-44	646.344	614.716	605.973	236.977	236.354	209.752
634	PITRM1	5925.41	0.709381	0.05026	14.1142	3.1037e-45	8.16998e-44	4403.65	4438.63	4649.93	7520.53	7470.58	7069.13
635	LIF	704.678	1.28762	0.0912486	14.1111	3.2454e-45	8.52952e-44	435.515	359.327	434.021	1048.47	1011.24	939.493
636	NCOA5	1054.38	-1.04123	0.073831	-14.1028	3.64875e-45	9.57453e-44	1399.59	1408.6	1449.16	684.046	740.975	643.89
637	KLF16	1925.55	0.876708	0.0621862	14.0981	3.90099e-45	1.02204e-43	1429.28	1304.66	1339.35	2570.9	2509.14	2399.95
638	PIP5K1C	2245.12	-0.848661	0.0602738	-14.0801	5.03372e-45	1.31673e-43	2974.37	2720.19	2966.68	1614.03	1634.53	1560.94
639	ACOT7	5162.33	0.809921	0.0575451	14.0745	5.44571e-45	1.42228e-43	3625.66	3571.49	4054.32	6393.39	6756.53	6572.55
640	CCHCR1	1427.62	-0.98663	0.0701422	-14.0661	6.13192e-45	1.59899e-43	1865.79	1787.73	2039.59	993.709	938.435	940.469
641	HEATR1	2737.08	0.941298	0.0669701	14.0555	7.12746e-45	1.8557e-43	1874.69	1989.66	1758.87	3712.97	3302.97	3783.34
642	PSMC4	4425.22	0.786233	0.0559417	14.0545	7.22785e-45	1.8789e-43	3181.24	3114.17	3450.42	5583.89	5806.13	5415.5
643	RPUSD3	1722.82	0.889566	0.063307	14.0516	7.52868e-45	1.95406e-43	1226.37	1146.28	1251.31	2181.58	2321.65	2209.71
644	TGIF1	996.449	1.00171	0.0712987	14.0495	7.76233e-45	2.01158e-43	648.323	680.049	662.944	1358.14	1302.44	1326.8
645	NTMT1	1195.72	1.03033	0.0733374	14.0492	7.79005e-45	2.01563e-43	838.366	737.462	782.067	1637.93	1661.46	1517.04
646	STK24	9283.73	0.683529	0.0487181	14.0303	1.01762e-44	2.62894e-43	7069.2	7047.96	7257.17	11169.8	12013.2	11145.1
647	LOC101928841	318.71	1.7476	0.124683	14.0163	1.23977e-44	3.19791e-43	173.216	129.674	135.696	487.893	513.596	472.186
648	CAD	7049.77	0.744668	0.0531562	14.0091	1.37227e-44	3.53424e-43	5345.94	5107.79	5355.35	9097.72	9108.1	8283.74
649	TSPYL4	1334.37	-0.896221	0.0640281	-13.9973	1.61877e-44	4.16267e-43	1702.47	1757.04	1748.52	942.929	928.462	926.811
650	TUBG1	5410.68	0.837246	0.0598423	13.9909	1.77238e-44	4.55064e-43	3950.32	3551.69	4148.58	6874.32	7175.39	6763.77
651	LPIN3	456.359	-1.4007	0.100295	-13.9658	2.52229e-44	6.46614e-43	690.885	619.666	675.375	258.882	255.302	238.044
652	ZFHX4	903.822	-1.23686	0.0886827	-13.947	3.28222e-44	8.40139e-43	1244.19	1373.96	1189.16	598.416	478.692	538.526
653	ZC3HAV1	1568.71	-0.914968	0.0656111	-13.9453	3.35941e-44	8.58578e-43	2034.05	2125.28	1990.91	1145.06	1029.19	1087.78
654	TTC28	3465.67	-0.77058	0.0552886	-13.9374	3.75315e-44	9.57743e-43	4326.44	4557.41	4225.23	2669.47	2509.14	2506.29
655	TRMT61A	547.789	1.31337	0.0942508	13.9348	3.8907e-44	9.91326e-43	314.758	294.985	333.544	749.763	832.724	760.96
656	TTC7A	1100.73	1.05677	0.0758625	13.93	4.16148e-44	1.0587e-42	699.793	675.099	769.637	1570.22	1476.96	1412.65
657	ANKRD37	108.13	3.6069	0.259001	13.9262	4.39128e-44	1.11546e-42	11.8777	22.7673	14.5019	211.089	191.477	197.069
658	THAP4	2383.21	0.842989	0.0605491	13.9224	4.63115e-44	1.17461e-42	1658.92	1647.16	1812.74	3087.67	3149.39	2943.36
659	ITPRIP	1154.54	0.96287	0.0691626	13.9218	4.66811e-44	1.18219e-42	786.896	757.259	804.856	1568.23	1539.79	1470.21
660	CDR2L	1564.79	0.916125	0.0658178	13.9191	4.84961e-44	1.22629e-42	1028.41	1066.1	1158.08	2021.27	2100.26	2014.59
661	ZNF593	911.108	1.13011	0.0812567	13.9079	5.6754e-44	1.43293e-42	539.445	536.516	639.12	1220.73	1263.55	1267.29
662	PNISR	1413.9	-1.07754	0.0775351	-13.8975	6.56061e-44	1.65393e-42	1812.34	2019.36	1924.61	936.954	805.797	984.371
663	FZD4	1121.06	-1.02804	0.0740729	-13.8788	8.518e-44	2.14415e-42	1573.79	1554.11	1384.93	750.758	734.991	727.79
664	HAND1	1164.55	-0.972626	0.0701307	-13.8688	9.7959e-44	2.4621e-42	1541.13	1503.63	1583.82	789.591	825.743	743.4
665	SMARCA1	1403.61	-1.07154	0.0773454	-13.854	1.20335e-43	3.01995e-42	1892.51	2053.01	1760.95	854.311	871.618	989.249
666	HSD17B12	3813.16	0.799373	0.0577089	13.8518	1.24037e-43	3.1082e-42	2756.61	2935	2656.96	4794.3	4652.28	5083.8
667	MAPK4	446.964	-1.42173	0.102864	-13.8214	1.89265e-43	4.7356e-42	628.527	678.069	646.371	217.063	249.319	262.434
668	EARS2	1109.03	0.982584	0.0711261	13.8147	2.07872e-43	5.1931e-42	733.447	717.664	785.175	1505.5	1493.92	1418.51
669	MAD2L2	5214.63	0.83715	0.060599	13.8146	2.08172e-43	5.1931e-42	3708.8	3479.43	4040.85	6444.18	7005.85	6608.65
670	POLR3D	1269.45	0.926392	0.0670617	13.814	2.0977e-43	5.22515e-42	853.213	852.288	920.871	1670.79	1686.39	1633.14
671	HES1	3253.72	0.781146	0.0565847	13.8049	2.38053e-43	5.92081e-42	2349.8	2300.48	2531.62	4085.36	4245.4	4009.68
672	GALNT2	7589.12	0.666692	0.0483116	13.7998	2.55483e-43	6.33546e-42	5972.49	5649.25	5976.86	9489.03	9405.29	9041.77
673	KLF7	490.185	1.49607	0.108412	13.7998	2.55389e-43	6.33546e-42	230.625	308.843	229.959	716.905	726.016	728.766
674	PHB	6758.64	0.789682	0.0572326	13.7978	2.62902e-43	6.50976e-42	4858.96	4661.35	5341.88	8303.15	8862.77	8523.73
675	GPI	15317.2	0.716552	0.0519384	13.7962	2.68646e-43	6.64213e-42	11505.5	11114.4	12149.5	19547.6	19533.6	18052.3
676	GAS1	474.155	-1.34492	0.0975149	-13.7919	2.85093e-43	7.03834e-42	700.783	644.413	696.092	279.792	267.269	256.58
677	NLGN2	3584.72	-0.86852	0.0630138	-13.783	3.22459e-43	7.94905e-42	4823.33	4365.38	4707.94	2701.34	2566.98	2343.37
678	SCN4B	342.633	-1.58951	0.115381	-13.7761	3.54779e-43	8.7329e-42	528.557	507.809	506.531	191.175	169.537	152.192
679	RFX2	683.339	1.20593	0.087568	13.7713	3.79088e-43	9.31752e-42	456.301	399.912	383.265	926.997	984.31	949.249
680	SLC19A1	1946.16	0.904718	0.0658358	13.742	5.68637e-43	1.39559e-41	1375.83	1299.71	1390.11	2457.39	2731.53	2422.39
681	SLC35E2B	3085.32	-0.773622	0.0563073	-13.7393	5.90537e-43	1.44721e-41	4064.15	3749.67	3865.79	2245.31	2366.53	2220.44
682	MYDGF	1922.18	0.93016	0.0677278	13.7338	6.37065e-43	1.55894e-41	1248.15	1272.99	1449.16	2420.55	2553.02	2589.22
683	POLR3E	1178.4	0.926641	0.067501	13.7278	6.92035e-43	1.69098e-41	807.682	791.905	838.003	1523.42	1577.69	1531.68
684	NRIP3	1897.86	0.794791	0.0579211	13.722	7.50169e-43	1.83035e-41	1385.73	1358.12	1420.15	2412.58	2420.38	2390.2
685	ARID1A	6403.64	-0.751665	0.0548211	-13.7112	8.6954e-43	2.1185e-41	8363.86	7938.85	7802.03	5057.16	4738.05	4521.86
686	CLIC1	4809.5	0.955982	0.0697549	13.7049	9.49392e-43	2.30968e-41	3005.05	3194.35	3617.19	5840.78	6681.74	6517.92
687	DHX37	1286.97	0.998642	0.0729186	13.6953	1.08306e-42	2.63104e-41	846.285	805.763	923.979	1704.64	1807.06	1634.11
688	MGLL	1182.95	1.03548	0.0756089	13.6952	1.08532e-42	2.63268e-41	752.253	737.462	838.003	1574.2	1692.37	1503.38
689	FOLR1	766.038	-1.13486	0.0828909	-13.691	1.14917e-42	2.78354e-41	1073.94	979.983	1104.22	492.872	487.667	457.552
690	DPY19L3	646.376	-1.20179	0.0878842	-13.6747	1.43701e-42	3.4757e-41	901.714	961.175	840.075	381.353	394.921	399.016
691	RTL5	1205.31	-0.984417	0.0719902	-13.6743	1.44553e-42	3.49124e-41	1624.27	1528.38	1651.15	861.281	807.792	759.009
692	STRAP	6374.42	0.664845	0.0486823	13.6568	1.83864e-42	4.43425e-41	4925.28	5060.27	4807.38	7559.36	7983.18	7911.06
693	FADS1	11823.9	-0.642674	0.047098	-13.6455	2.14831e-42	5.17362e-41	14570	14534.4	14139.4	9495	9381.36	8823.24
694	EDIL3	810.599	-1.24258	0.0910872	-13.6416	2.26456e-42	5.44571e-41	1070.97	1281.9	1065.89	477.936	452.762	514.136
695	BUD23	1597.05	0.999897	0.0733169	13.638	2.37979e-42	5.71457e-41	1081.86	965.134	1147.72	2189.55	2202.98	1995.08
696	RARA	1652.77	0.91152	0.0668551	13.6343	2.50505e-42	6.00671e-41	1191.73	1137.37	1112.5	2221.41	2243.87	2009.72
697	LRRFIP1	1649.06	0.937962	0.068834	13.6264	2.78921e-42	6.67851e-41	1072.95	1231.41	1088.68	2247.3	2085.3	2168.74
698	LRP8	1187.58	0.973564	0.0715196	13.6125	3.37324e-42	8.06533e-41	842.325	817.642	743.741	1629.96	1533.81	1558.02
699	PNPT1	992.745	1.17885	0.0866274	13.6083	3.57514e-42	8.53583e-41	642.384	645.403	536.571	1428.83	1252.58	1450.7
700	ZNF587	1440.25	-0.892641	0.0656273	-13.6017	3.91383e-42	9.33114e-41	1870.73	1852.07	1893.54	1072.37	971.345	981.444
701	CEMIP2	709.154	-1.15688	0.0850657	-13.5998	4.01392e-42	9.55611e-41	1003.66	1006.71	927.086	453.044	405.891	458.527
702	GAPDH	132925	0.689814	0.0507731	13.5862	4.83409e-42	1.14923e-40	98761.9	97776.5	108677	160408	169288	162637
703	ABCF2	3248.67	0.776709	0.0571833	13.5828	5.06521e-42	1.20246e-40	2428	2281.68	2474.65	4162.03	4238.41	3907.24
704	HK1	9299.16	0.689254	0.0507486	13.5817	5.13857e-42	1.21642e-40	7071.18	6843.05	7443.62	11830.9	11567.4	11038.8
705	RABEPK	620.367	1.17072	0.0861979	13.5818	5.13772e-42	1.21642e-40	405.821	374.175	364.619	860.285	864.637	852.666
706	PPP2R2A	2938.18	0.741931	0.0546315	13.5807	5.2155e-42	1.23288e-40	2241.91	2237.13	2117.28	3661.19	3589.19	3782.36
707	PPP1R14C	1326.72	0.898368	0.0661687	13.5769	5.48847e-42	1.29557e-40	909.632	902.772	967.485	1678.75	1764.18	1737.53
708	LDLRAD3	2822.87	0.784953	0.0578649	13.5653	6.43489e-42	1.51683e-40	2084.53	2021.34	2114.17	3754.79	3571.24	3391.15
709	PMAIP1	6894	0.799464	0.0589477	13.5623	6.70349e-42	1.57792e-40	4949.03	5391.88	4752.48	8343.97	8668.31	9258.35
710	PUM3	534.11	1.31716	0.097268	13.5416	8.88859e-42	2.08932e-40	310.799	314.782	292.11	722.879	728.01	836.081
711	ALKBH3	1647.06	0.826816	0.0610666	13.5396	9.13206e-42	2.14161e-40	1146.2	1199.74	1217.12	2074.04	2130.18	2115.08
712	DCHS1	736.982	-1.11063	0.0820285	-13.5395	9.13671e-42	2.14161e-40	1017.52	975.033	1029.64	489.885	474.702	435.113
713	IL15RA	139.334	2.58195	0.190809	13.5316	1.01748e-41	2.38159e-40	31.6738	43.5548	44.5416	233.99	238.349	243.898
714	SERPINB8	173.856	2.20501	0.163155	13.5148	1.27892e-41	2.98935e-40	66.317	56.4232	63.1869	295.723	293.199	268.287
715	MAGED1	17381.5	-0.672007	0.0497317	-13.5127	1.31677e-41	3.07352e-40	21157.1	20749.9	22167.2	13462.9	13976.8	12775.4
716	CA11	923.149	-1.07212	0.0794006	-13.5026	1.50874e-41	3.51666e-40	1222.41	1252.2	1279.28	536.683	608.337	639.987
717	CPSF6	2886.71	-0.797324	0.059139	-13.4822	1.99071e-41	4.6336e-40	3668.22	3857.57	3468.03	2155.69	2023.47	2147.27
718	RSL24D1	1356.47	0.870931	0.0646067	13.4805	2.03732e-41	4.73548e-40	942.296	985.922	948.839	1731.52	1730.27	1799.96
719	PYGB	3939.94	0.763294	0.0566253	13.4797	2.05874e-41	4.77862e-40	2828.87	2850.86	3084.76	5046.21	5108.04	4720.88
720	NKD2	1417.75	0.964012	0.0715209	13.4788	2.08607e-41	4.83534e-40	968.031	894.853	1020.31	1890.84	1967.62	1764.84
721	PGAM5	2912.23	0.858895	0.0637398	13.475	2.19417e-41	5.07886e-40	2055.83	1911.46	2243.65	3748.81	3886.38	3627.24
722	NLE1	1931.09	0.924891	0.0686588	13.4708	2.32235e-41	5.3681e-40	1259.03	1263.09	1476.09	2561.94	2563.99	2462.39
723	CCN1	2908.65	0.720364	0.053506	13.4632	2.57351e-41	5.94043e-40	2215.19	2165.86	2210.51	3631.32	3719.83	3509.2
724	PBXIP1	730.197	-1.10786	0.0823359	-13.4553	2.86384e-41	6.60147e-40	1008.61	950.286	1033.78	453.044	487.667	447.796
725	SLC2A14	219.241	1.89031	0.140729	13.4323	3.91273e-41	9.00683e-40	95.0214	85.1298	99.4417	349.491	338.076	348.286
726	SNAI1	815.864	1.06461	0.0793225	13.4213	4.53491e-41	1.04247e-39	534.496	525.627	523.105	1102.24	1166.81	1042.91
727	WWC1	1204.01	0.90721	0.0677554	13.3895	6.96457e-41	1.59879e-39	834.407	826.551	851.469	1551.3	1634.53	1525.82
728	SBNO2	2552.79	0.781441	0.0583825	13.3848	7.41629e-41	1.70014e-39	1912.31	1765.95	1955.69	3295.77	3222.19	3164.81
729	JTB	3086.97	0.771423	0.0576641	13.3779	8.14496e-41	1.86463e-39	2286.45	2145.07	2411.46	3801.59	3963.17	3914.07
730	EIF2B3	1534.32	0.868594	0.0649894	13.3652	9.66176e-41	2.20884e-39	1041.28	1065.11	1151.87	1942.61	2031.45	1973.62
731	FERMT1	1065.56	0.955395	0.0715192	13.3586	1.05544e-40	2.4096e-39	716.62	734.492	724.06	1390.99	1477.96	1349.24
732	HECTD4	3405.55	-0.771075	0.0577245	-13.3578	1.06607e-40	2.43054e-39	4345.25	4423.78	4114.4	2644.58	2378.5	2526.78
733	ZNF827	740.805	-1.07934	0.0808465	-13.3505	1.17707e-40	2.67996e-39	1022.47	992.851	1001.67	450.057	504.621	473.161
734	CXCL12	209.14	-1.93395	0.144869	-13.3497	1.18988e-40	2.70543e-39	319.707	322.701	352.189	82.6432	91.7492	85.8519
735	HP1BP3	5690.99	-0.644336	0.0482981	-13.3408	1.33947e-40	3.04141e-39	7010.8	6932.14	6880.12	4451.78	4580.48	4290.65
736	DUSP9	1867.03	0.891631	0.0668792	13.332	1.50895e-40	3.42158e-39	1286.75	1229.43	1407.72	2397.65	2546.04	2334.59
737	LY6E	4100.84	0.822741	0.0617183	13.3306	1.53694e-40	3.48031e-39	2988.23	2723.16	3175.92	5163.7	5478.03	5076
738	CTNND1	8944.71	-0.617901	0.0463726	-13.3247	1.66308e-40	3.76086e-39	10929.4	10949.1	10615.4	7291.52	7007.84	6874.98
739	SDC4	2921.92	0.728414	0.0546735	13.323	1.70137e-40	3.84224e-39	2132.04	2172.79	2294.41	3577.55	3713.85	3640.9
740	WDR46	1055.68	1.01885	0.0764913	13.3198	1.7752e-40	4.00356e-39	692.865	642.433	758.243	1397.96	1467.99	1374.61
741	LRWD1	1567.86	0.921892	0.0692728	13.3081	2.07565e-40	4.67483e-39	1066.02	1005.72	1178.8	2071.06	2098.26	1987.28
742	CHPF2	1673.05	-0.808359	0.0607576	-13.3047	2.17449e-40	4.89084e-39	2131.05	2092.61	2165.96	1208.78	1254.57	1185.34
743	WBP1	2084.41	-0.841169	0.063252	-13.2987	2.35549e-40	5.29081e-39	2750.67	2516.28	2759.51	1559.27	1426.1	1494.6
744	CTSB	2710.38	0.801915	0.0603067	13.2973	2.40041e-40	5.38447e-39	1895.48	1909.48	2123.49	3471.01	3523.37	3339.45
745	JRK	1361.62	-0.945535	0.0711379	-13.2916	2.59076e-40	5.80366e-39	1769.77	1694.68	1913.22	977.778	927.465	886.812
746	SH2D5	199.31	2.23923	0.168475	13.2911	2.60545e-40	5.82873e-39	82.1539	56.4232	70.4378	288.753	383.951	314.14
747	AKIRIN2	3015.33	0.749753	0.0564441	13.2831	2.90044e-40	6.47998e-39	2254.78	2315.33	2176.32	3720.93	3965.16	3659.44
748	RIOK1	936.985	1.02308	0.0770219	13.2829	2.90753e-40	6.48713e-39	583.986	672.129	597.686	1246.62	1282.49	1239
749	ELFN2	1605.94	0.924924	0.0697139	13.2674	3.57721e-40	7.97063e-39	1188.76	1012.65	1122.86	2153.7	2139.15	2018.5
750	FEZ2	1534.78	0.859731	0.0648017	13.2671	3.59222e-40	7.99342e-39	1048.21	1069.07	1154.97	1970.49	1937.7	2028.25
751	SNAPC2	1025.95	0.963028	0.0726184	13.2615	3.87133e-40	8.60301e-39	716.62	668.17	702.307	1347.18	1414.13	1307.29
752	COASY	5173.39	0.671935	0.0506757	13.2595	3.97448e-40	8.8205e-39	3992.88	3827.87	4149.62	6397.38	6447.38	6225.24
753	TIMM50	4245	0.861183	0.0649748	13.2541	4.27175e-40	9.46762e-39	2904.09	2827.1	3312.65	5542.07	5716.38	5167.7
754	LOXL1	3189.66	-0.798509	0.0603036	-13.2415	5.0532e-40	1.11847e-38	4021.58	3913.99	4215.91	2310.03	2488.2	2188.25
755	KPNB1	19202.8	0.602221	0.0455056	13.234	5.5832e-40	1.23415e-38	14863.9	15880.7	15011.5	23180.9	22734.9	23544.9
756	NEURL1B	699.275	-1.07155	0.0811156	-13.2102	7.66497e-40	1.69207e-38	930.418	951.276	961.269	468.975	440.795	442.918
757	USP36	2546.61	0.71542	0.0541597	13.2094	7.73903e-40	1.70616e-38	1939.03	1911.46	1932.9	3212.13	3203.24	3080.91
758	C11orf95	1638.26	-0.861665	0.0652814	-13.1992	8.86318e-40	1.95142e-38	2212.22	2051.03	2076.88	1229.69	1133.9	1125.83
759	MXI1	2780.39	0.732202	0.0555028	13.1922	9.73381e-40	2.14028e-38	2062.76	2181.7	2024.05	3448.11	3411.67	3554.08
760	TBRG4	2153.95	0.814843	0.0617717	13.1912	9.8606e-40	2.16531e-38	1552.02	1467.99	1664.61	2737.18	2806.33	2695.56
761	POLRMT	2947.24	0.862208	0.0654165	13.1803	1.13959e-39	2.49916e-38	2019.21	1992.63	2264.37	3724.92	4060.9	3621.39
762	YIF1A	3366.89	0.713756	0.0541842	13.1728	1.25881e-39	2.75699e-38	2515.1	2465.79	2671.46	4197.87	4266.34	4084.8
763	SUGP2	3249.77	-0.692698	0.0526434	-13.1583	1.52442e-39	3.33434e-38	4019.6	4031.79	3994.24	2579.86	2469.25	2403.85
764	MTFP1	1301.4	1.03758	0.0788725	13.1551	1.59e-39	3.47323e-38	880.928	751.32	926.051	1701.65	1849.94	1698.5
765	ANKRD33B	6575.37	-0.708838	0.0539065	-13.1494	1.71528e-39	3.742e-38	8163.92	8610.98	7701.55	5134.83	4852.74	4988.19
766	PFKP	6444.47	0.740853	0.056343	13.149	1.72489e-39	3.75805e-38	4743.15	4612.85	5120.21	8131.89	8413	7645.7
767	SH2D2A	137.438	2.50572	0.190566	13.1488	1.72842e-39	3.76083e-38	49.4903	38.6054	35.2189	224.033	234.359	242.922
768	YRDC	642.749	1.21597	0.092537	13.1404	1.93262e-39	4.19968e-38	374.147	428.619	357.368	951.89	902.533	841.934
769	QSOX1	3767.65	0.775341	0.0590125	13.1386	1.97872e-39	4.29427e-38	2720.98	2654.86	2961.5	4796.29	4948.47	4523.81
770	CBARP	501.501	1.34692	0.102568	13.132	2.15972e-39	4.68098e-38	289.023	242.521	318.006	720.887	742.969	695.596
771	MRPL37	7856.14	0.701827	0.0534951	13.1195	2.54771e-39	5.51476e-38	5805.22	5834.36	6307.29	9401.41	10216.1	9572.49
772	SF3A3	4372.01	0.623632	0.0475399	13.1181	2.59451e-39	5.60877e-38	3407.9	3449.74	3466.99	5311.07	5315.47	5280.87
773	CPM	748.789	1.16187	0.0886782	13.1021	3.20344e-39	6.91619e-38	460.26	516.718	410.197	1066.4	995.28	1043.88
774	ZNF417	379.677	-1.39563	0.106565	-13.0964	3.45038e-39	7.43972e-38	576.067	527.607	546.929	207.106	218.403	201.947
775	SH3TC1	474.136	1.35236	0.103327	13.0881	3.85115e-39	8.29315e-38	276.156	231.632	293.146	689.025	707.067	647.792
776	SAPCD2	4329.27	0.697238	0.0533168	13.0773	4.44085e-39	9.55068e-38	3350.49	3146.83	3412.09	5305.09	5535.87	5225.26
777	VDR	789.56	1.09444	0.0836957	13.0764	4.49352e-39	9.65153e-38	549.343	463.264	498.244	1081.33	1114.95	1030.22
778	PRMT3	1173.99	0.952043	0.072879	13.0633	5.33376e-39	1.14415e-37	791.845	861.197	746.848	1522.43	1512.86	1608.75
779	SLC35E2A	1050.67	-0.97265	0.0746106	-13.0364	7.60037e-39	1.62828e-37	1431.26	1347.23	1397.36	764.698	698.092	665.353
780	EIF3B	9346.34	0.669947	0.0514043	13.0329	7.9529e-39	1.70161e-37	7208.76	6906.4	7528.56	11552.1	11877.5	11004.7
781	EIF2B2	1347.94	0.862026	0.0661484	13.0317	8.07977e-39	1.72655e-37	911.612	978.003	980.951	1723.56	1790.11	1703.38
782	STAT2	1238.48	-0.994659	0.0763449	-13.0285	8.42513e-39	1.79804e-37	1651	1570.94	1725.73	891.152	846.686	745.351
783	SRXN1	2296.96	0.747911	0.0574425	13.0202	9.39589e-39	2.00266e-37	1722.26	1668.94	1752.66	2991.09	2831.26	2815.55
784	NPAS2	729.739	1.0605	0.0814779	13.0158	9.95324e-39	2.11874e-37	476.097	491.971	450.595	962.843	1027.19	969.737
785	CDC34	3522.72	0.779899	0.0599353	13.0124	1.04081e-38	2.21274e-37	2622.99	2426.2	2730.5	4437.84	4664.25	4254.55
786	ADGRE5	3187.7	0.688047	0.0528824	13.0109	1.06122e-38	2.25327e-37	2395.33	2476.68	2452.89	3921.07	4056.91	3823.34
787	SLC6A15	1082.79	1.01293	0.0778574	13.01	1.07316e-38	2.27572e-37	724.538	747.36	680.554	1466.67	1328.37	1549.24
788	TRIP13	5166.91	0.611097	0.046994	13.0037	1.16553e-38	2.46847e-37	4104.73	4063.46	4097.83	6190.27	6373.58	6171.58
789	OLFML2A	1076.98	-1.06189	0.0816733	-13.0017	1.19665e-38	2.53117e-37	1559.94	1392.76	1416.01	756.733	713.051	623.402
790	KCTD5	3260.65	0.692689	0.0532867	12.9993	1.23491e-38	2.60878e-37	2537.86	2409.37	2530.58	4021.64	4138.69	3925.78
791	REXO4	3875.4	0.724159	0.0558028	12.9771	1.64977e-38	3.48078e-37	2895.18	2834.03	3039.19	4805.25	5066.15	4612.59
792	PWP2	1917.57	0.788431	0.0607739	12.9732	1.73646e-38	3.65906e-37	1464.91	1351.19	1402.54	2487.26	2449.31	2350.2
793	LPP	1781.65	-0.946466	0.0729877	-12.9675	1.87079e-38	3.93714e-37	2380.48	2518.26	2139.03	1202.81	1148.86	1300.46
794	NPDC1	4510.24	0.705618	0.0544311	12.9635	1.97004e-38	4.1408e-37	3371.28	3346.79	3568.51	5547.05	5864.97	5362.82
795	UBE2M	8564.42	0.811219	0.0625825	12.9624	1.99921e-38	4.19683e-37	6017.03	5784.87	6853.19	11032.4	11307.1	10392
796	CCNB1	4281.49	0.628339	0.0485017	12.955	2.20202e-38	4.61678e-37	3392.07	3299.27	3399.66	5203.53	5135.96	5258.43
797	STK38	1290.47	-0.841318	0.0649577	-12.9518	2.29561e-38	4.80696e-37	1623.28	1691.71	1654.25	918.036	941.427	914.128
798	STK36	572.316	-1.23463	0.0954811	-12.9306	3.02474e-38	6.3258e-37	822.529	722.613	864.935	338.538	333.09	352.188
799	CTPS1	4421.49	0.705715	0.0545845	12.9288	3.09438e-38	6.46334e-37	3472.24	3204.25	3406.91	5627.7	5586.73	5231.11
800	KIF20A	2177.57	-0.719397	0.0556441	-12.9286	3.10609e-38	6.47969e-37	2693.26	2695.45	2739.83	1668.79	1654.48	1613.63
801	ZNF395	3431.32	0.702084	0.0543799	12.9107	3.91551e-38	8.15805e-37	2683.37	2578.64	2575.12	4389.05	4306.23	4055.53
802	PLIN2	387.22	1.36748	0.106029	12.8971	4.6719e-38	9.72185e-37	219.737	214.804	214.421	532.7	548.501	593.159
803	CPA4	163.468	2.18329	0.169382	12.8897	5.14303e-38	1.06889e-36	50.4801	61.3726	65.2586	287.758	262.283	253.653
804	THBD	164.37	2.20294	0.170916	12.889	5.1892e-38	1.07715e-36	60.3782	49.4941	66.2944	282.779	245.329	281.946
805	FGFR2	1293.6	-0.841162	0.0654123	-12.8594	7.61902e-38	1.57955e-36	1639.12	1713.48	1628.36	937.95	932.451	910.226
806	EVC	1186.12	-0.905564	0.0705073	-12.8435	9.34907e-38	1.93581e-36	1575.77	1566.98	1496.8	882.191	800.811	794.13
807	PHC2	3467.6	0.702713	0.0547759	12.8289	1.12989e-37	2.33666e-36	2617.05	2590.52	2710.82	4274.54	4493.72	4118.94
808	H3F3A	1606.9	-0.838108	0.065334	-12.828	1.14214e-37	2.35905e-36	1967.74	2108.45	2106.92	1088.3	1179.78	1190.22
809	RGS12	897.243	-0.980859	0.076471	-12.8265	1.16437e-37	2.40201e-36	1183.81	1172.02	1217.12	604.39	641.247	564.867
810	CNDP2	2006.61	0.778611	0.0607098	12.8251	1.18568e-37	2.44294e-36	1454.03	1428.4	1551.7	2546.01	2607.87	2451.66
811	ATP6V0B	3304.75	0.839388	0.0654561	12.8237	1.20835e-37	2.48658e-36	2327.04	2184.67	2597.91	4160.04	4442.86	4116.02
812	SDAD1	1076.11	0.964033	0.075278	12.8063	1.5116e-37	3.10679e-36	749.284	767.158	671.231	1366.1	1413.14	1489.73
813	EIF4B	17080.3	-0.566898	0.0442898	-12.7997	1.6453e-37	3.37742e-36	20745.4	20778.6	19656.3	13904	13739.4	13658.3
814	FAM219A	1779.52	0.784479	0.0613084	12.7956	1.73454e-37	3.55624e-36	1318.42	1260.12	1343.5	2329.94	2235.89	2189.22
815	OAF	2826.58	0.747763	0.0584417	12.795	1.74768e-37	3.57878e-36	2131.05	1979.76	2219.83	3468.03	3633.07	3527.73
816	VASP	2734.2	0.739719	0.0578865	12.7788	2.154e-37	4.4054e-36	2085.52	1915.42	2144.21	3427.2	3400.7	3432.13
817	KLHDC7B	102.13	2.99356	0.234281	12.7776	2.18658e-37	4.46657e-36	22.7655	20.7875	24.8604	189.183	182.501	172.679
818	ADSL	3458.09	0.717884	0.0562185	12.7695	2.42575e-37	4.94906e-36	2556.67	2519.25	2769.86	4227.75	4445.85	4229.18
819	NINL	661.925	-1.08785	0.0852545	-12.76	2.74272e-37	5.58891e-36	889.836	858.227	952.983	438.108	413.869	418.528
820	EIF5AL1	693.765	1.09651	0.0860113	12.7485	3.17914e-37	6.47033e-36	434.525	449.406	442.308	976.782	991.29	868.275
821	CPNE4	118.423	-2.61173	0.204948	-12.7434	3.39171e-37	6.89455e-36	198.951	212.824	198.883	28.8753	34.9046	36.0968
822	STK40	3473.14	0.663036	0.0520381	12.7414	3.48246e-37	7.07042e-36	2755.62	2611.31	2699.43	4348.23	4263.35	4160.89
823	RELB	280.161	1.6806	0.13191	12.7405	3.52203e-37	7.14207e-36	142.532	132.644	124.302	456.031	453.76	371.7
824	SUOX	523.635	-1.25749	0.0987187	-12.7381	3.63187e-37	7.35586e-36	725.528	710.735	778.96	347.5	295.193	283.897
825	RUVBL2	7199.52	0.862603	0.0677224	12.7373	3.66715e-37	7.4183e-36	4878.76	4708.87	5740.68	9079.8	9788.25	9000.8
826	LSM12	1322.67	0.832487	0.0653794	12.7332	3.86797e-37	7.81507e-36	937.347	978.003	938.481	1639.92	1723.29	1718.99
827	CNIH3	224.814	1.9548	0.153528	12.7326	3.89755e-37	7.86531e-36	83.1437	89.0893	104.621	395.293	299.182	377.553
828	TMX2	5094.02	0.672792	0.0528611	12.7275	4.15749e-37	8.37976e-36	3991.89	3805.1	3984.92	6432.23	6416.46	5933.54
829	ADM	509.358	1.19666	0.0940553	12.723	4.40648e-37	8.87089e-36	328.616	290.035	309.719	692.012	704.076	731.693
830	DPH2	894.271	0.996434	0.0783401	12.7193	4.61758e-37	9.28467e-36	612.69	580.07	598.722	1121.16	1272.52	1180.46
831	FAM217B	1218.56	-1.11669	0.0877989	-12.7187	4.6552e-37	9.34905e-36	1716.32	1818.41	1468.84	829.419	688.119	790.228
832	PITPNC1	896.889	0.960135	0.0755334	12.7114	5.11181e-37	1.02537e-35	606.751	597.888	622.546	1125.14	1201.72	1227.29
833	EFCAB14	1981.17	-0.790581	0.0622233	-12.7055	5.50823e-37	1.10356e-35	2517.08	2642.98	2372.1	1462.68	1414.13	1478.02
834	HYOU1	6412.19	0.654168	0.0515084	12.7002	5.89579e-37	1.17979e-35	5009.41	4786.08	5153.36	7875.99	8113.82	7534.48
835	LAS1L	3669.76	0.740473	0.0583144	12.6979	6.07164e-37	1.21353e-35	2713.06	2597.45	2934.56	4647.93	4707.13	4418.45
836	DUSP12	613.48	1.08045	0.0851551	12.6881	6.88531e-37	1.37451e-35	391.963	388.034	401.91	808.509	841.699	848.764
837	RIPK2	495.648	1.22482	0.0965928	12.6802	7.61051e-37	1.51747e-35	287.044	306.863	297.289	687.034	654.212	741.449
838	ARHGDIA	37363.3	0.68672	0.0541736	12.6763	8.00429e-37	1.59408e-35	29895.1	26662.5	29347.7	46770.1	47691.6	43812.8
839	RBMX	7622.55	-0.630176	0.0497206	-12.6743	8.20381e-37	1.63186e-35	8938.94	9704.8	9140.35	5882.6	5947.74	6120.85
840	MED8	1332.8	0.819352	0.0646965	12.6645	9.29538e-37	1.84679e-35	969.021	933.458	990.273	1713.6	1717.31	1673.14
841	FSD1	1997.32	0.838246	0.0662134	12.6598	9.8789e-37	1.96039e-35	1381.77	1371.98	1545.49	2455.4	2696.63	2532.63
842	DYNC1LI2	1419.81	-0.821226	0.0648826	-12.6571	1.02188e-36	2.02544e-35	1878.65	1832.27	1728.83	1024.58	1030.18	1024.37
843	PRRT2	185.8	-2.07471	0.163966	-12.6533	1.07304e-36	2.1243e-35	304.86	257.369	338.723	70.6948	77.7874	65.3645
844	PLPP2	267.267	1.60357	0.12691	12.6355	1.34458e-36	2.65874e-35	128.675	130.664	137.768	389.319	431.82	385.358
845	TMED9	3548.2	0.798023	0.0632019	12.6266	1.50713e-36	2.97663e-35	2656.64	2333.15	2784.37	4485.63	4500.7	4528.69
846	NIBAN2	3048.02	0.733216	0.0580997	12.6199	1.63926e-36	3.23377e-35	2332.97	2151.01	2385.56	3927.04	3811.58	3679.93
847	MED22	8425.65	0.630467	0.0499839	12.6134	1.78156e-36	3.51032e-35	6725.74	6318.41	6796.22	10315.5	10519.2	9878.83
848	NT5E	226.813	1.8103	0.143523	12.6133	1.78417e-36	3.51133e-35	85.1234	96.0185	121.195	343.517	355.03	359.993
849	UTP6	1272.61	0.832694	0.0660184	12.6131	1.78918e-36	3.51703e-35	926.459	882.974	936.409	1666.8	1600.62	1622.41
850	DNAAF3	495.909	1.26715	0.100498	12.6088	1.8888e-36	3.70849e-35	278.136	264.298	331.472	680.064	720.032	701.449
851	IRS1	903.305	0.947511	0.0751536	12.6077	1.91606e-36	3.7576e-35	631.497	630.554	588.363	1217.74	1144.87	1206.81
852	HSPBP1	1870.86	0.878302	0.0696843	12.604	2.00669e-36	3.93072e-35	1250.13	1249.23	1456.41	2430.51	2510.14	2328.73
853	HOXA5	254.395	-1.62315	0.128804	-12.6017	2.06595e-36	4.04204e-35	399.882	372.195	380.157	120.48	134.632	119.022
854	REXO2	994.825	0.909103	0.0721593	12.5986	2.1503e-36	4.20215e-35	659.211	714.694	700.235	1285.45	1330.36	1279
855	NOS3	486.304	1.18033	0.0937216	12.594	2.27815e-36	4.44678e-35	298.922	293.005	301.433	659.154	694.103	671.206
856	UNC13D	497.31	1.20144	0.0954793	12.5833	2.60966e-36	5.08793e-35	301.891	301.914	300.397	689.025	736.986	653.645
857	CYB5R2	85.8033	3.7283	0.296432	12.5772	2.81741e-36	5.48656e-35	16.8267	11.8786	7.25095	165.286	153.58	159.997
858	IGBP1	1591.63	-0.791043	0.0628983	-12.5766	2.84155e-36	5.52711e-35	1964.77	1980.75	2106.92	1138.09	1179.78	1179.49
859	MMP13	122.557	2.57889	0.205105	12.5735	2.95364e-36	5.73846e-35	39.5923	33.656	32.1114	185.2	220.398	224.386
860	GLUD1	5219.89	0.582179	0.0463212	12.5683	3.1539e-36	6.1204e-35	4129.47	4200.07	4212.8	6256.98	6293.8	6226.22
861	SEL1L3	2247.1	0.727801	0.0579265	12.5642	3.3221e-36	6.43932e-35	1655.95	1671.91	1748.52	2908.44	2751.48	2746.29
862	RFNG	3350.88	0.794717	0.0632535	12.564	3.33061e-36	6.44833e-35	2589.33	2283.66	2478.79	4179.95	4534.61	4038.94
863	APRT	7324.58	0.823372	0.0655354	12.5638	3.33968e-36	6.45838e-35	5222.22	4786.08	5860.84	9054.9	9754.34	9269.08
864	GATA2	2502.31	0.747074	0.0594706	12.5621	3.41251e-36	6.5916e-35	1929.13	1779.81	1896.64	3123.51	3275.05	3009.7
865	GADD45GIP1	2136.6	0.940993	0.0749648	12.5525	3.85346e-36	7.43473e-35	1362.96	1392.76	1635.61	2618.69	3003.79	2805.8
866	ZNF697	739.55	1.00289	0.079945	12.5448	4.24633e-36	8.18325e-35	497.873	511.769	467.169	974.791	1004.26	981.444
867	EPS15L1	3271.17	0.715408	0.0570527	12.5394	4.54274e-36	8.74438e-35	2422.06	2483.61	2523.33	4145.1	4235.42	3817.48
868	TLE4	1274.38	-0.867696	0.0692432	-12.5311	5.04296e-36	9.69608e-35	1658.92	1725.36	1554.81	933.967	879.596	893.641
869	VDAC1	10076.3	0.592237	0.0472818	12.5257	5.40294e-36	1.03763e-34	7872.92	7953.7	8283.7	11997.2	12535.7	11814.4
870	LRRC8D	886.147	0.937134	0.0748607	12.5184	5.92305e-36	1.1362e-34	609.721	616.696	597.686	1120.16	1165.81	1206.81
871	SCN9A	162.704	-2.07812	0.16611	-12.5105	6.53842e-36	1.25281e-34	282.095	252.42	254.819	63.7249	55.8473	67.3157
872	SH3RF3	1050.56	0.929623	0.0743081	12.5104	6.55024e-36	1.25363e-34	749.284	675.099	745.812	1445.76	1331.36	1356.07
873	STARD9	858.649	-1.01363	0.0810837	-12.5011	7.36499e-36	1.40795e-34	1083.84	1164.1	1197.44	613.352	561.465	531.697
874	RAB3A	624.377	1.12845	0.0902794	12.4995	7.51151e-36	1.43432e-34	391.963	355.367	428.842	886.174	854.664	829.252
875	PAK1IP1	409.821	1.3244	0.106022	12.4918	8.27352e-36	1.57802e-34	241.513	244.501	215.457	546.64	588.392	622.427
876	OBSL1	3261.81	-0.742695	0.0594748	-12.4876	8.73005e-36	1.66319e-34	4194.8	3875.39	4179.66	2478.3	2552.02	2290.69
877	SMAP2	2865.16	0.738821	0.0592087	12.4783	9.81142e-36	1.86708e-34	2201.33	2066.87	2173.21	3510.84	3805.6	3433.1
878	AATF	2857.99	0.762391	0.0611425	12.4691	1.1009e-35	2.09259e-34	2009.31	2085.68	2265.41	3554.65	3761.72	3471.15
879	BOD1	2036.19	0.748807	0.0601166	12.4559	1.29845e-35	2.46528e-34	1582.7	1465.02	1510.27	2489.25	2523.1	2646.78
880	SRPX	666.9	1.04451	0.0838599	12.4555	1.30611e-35	2.47701e-34	418.688	442.477	445.416	937.95	889.568	867.3
881	ECE2	437.67	1.29952	0.104396	12.448	1.4345e-35	2.71741e-34	280.115	223.713	254.819	646.21	615.318	605.842
882	TMC6	987.998	0.999141	0.080296	12.4432	1.52232e-35	2.8805e-34	692.865	585.02	699.199	1335.23	1351.31	1264.36
883	MYRF	3731.1	0.704984	0.0567674	12.4188	2.06608e-35	3.90496e-34	2944.67	2667.73	2899.35	4797.29	4607.41	4470.15
884	PSMD12	1820.89	0.793197	0.0639066	12.4118	2.25516e-35	4.2575e-34	1317.43	1429.39	1250.27	2311.02	2320.66	2296.54
885	FDXR	1736.23	-0.875277	0.0705257	-12.4108	2.28495e-35	4.30887e-34	2277.54	2043.12	2421.82	1199.82	1212.69	1262.41
886	UBE2D2	4319.6	0.662271	0.0533646	12.4103	2.29766e-35	4.32795e-34	3535.59	3191.38	3308.51	5250.33	5286.55	5345.26
887	TSEN15	1041.32	0.881966	0.0711387	12.3978	2.68486e-35	5.05159e-34	715.63	765.178	716.809	1376.06	1309.42	1364.85
888	AGAP3	3579.24	0.72245	0.0582885	12.3944	2.80337e-35	5.26863e-34	2777.4	2506.38	2820.62	4558.32	4497.71	4315.04
889	GMPS	4569.09	0.613793	0.04953	12.3923	2.87496e-35	5.39709e-34	3506.88	3650.68	3677.27	5656.58	5448.11	5475.01
890	NISCH	2765.89	-0.784152	0.0633246	-12.3831	3.22775e-35	6.05257e-34	3450.47	3286.41	3762.21	1994.39	2131.17	1970.69
891	RPL22L1	369.502	1.33274	0.107701	12.3745	3.59049e-35	6.72522e-34	223.696	193.027	213.385	533.696	518.583	534.623
892	CSNK1A1	3818.26	0.684206	0.0553383	12.364	4.09056e-35	7.65328e-34	3026.83	3000.33	2760.54	4770.4	4552.56	4798.93
893	SESN2	3971.31	0.755671	0.0611249	12.3627	4.15802e-35	7.7708e-34	3008.02	2844.92	3010.18	5053.18	5320.46	4591.13
894	ZNF337	1198.8	-0.8421	0.0681557	-12.3555	4.54687e-35	8.48801e-34	1504.51	1611.53	1500.95	863.273	869.623	842.91
895	DNLZ	526.973	1.17765	0.0953472	12.3512	4.80036e-35	8.9512e-34	344.453	310.823	313.863	686.038	778.871	727.79
896	TMEM97	3020.27	-0.656401	0.0531739	-12.3444	5.22077e-35	9.72428e-34	3755.33	3654.64	3677.27	2262.23	2403.43	2368.73
897	SLC22A23	1684.49	-0.813437	0.0659338	-12.3372	5.71303e-35	1.06293e-33	2141.94	2128.24	2171.14	1204.8	1318.4	1142.42
898	IDH3A	1854.24	0.796074	0.0645293	12.3366	5.75221e-35	1.06903e-33	1374.84	1419.49	1270.99	2305.05	2289.74	2465.32
899	FADS2	9075.99	-0.637798	0.0517169	-12.3325	6.05441e-35	1.12394e-33	11130.4	10433.3	11587	7029.65	7302.04	6973.52
900	ANKFY1	2716.38	-0.664656	0.0539013	-12.331	6.16884e-35	1.14391e-33	3372.27	3364.61	3256.71	2155.69	2055.38	2093.62
901	ADGRV1	822.462	-0.987228	0.0800796	-12.3281	6.39506e-35	1.18454e-33	1111.55	1126.49	1042.07	562.571	512.599	579.501
902	MIIP	1065.85	0.97849	0.0793909	12.325	6.64791e-35	1.23001e-33	717.61	669.16	766.53	1339.22	1534.8	1367.78
903	STMN1	7349.97	-0.645378	0.0523845	-12.32	7.06764e-35	1.30622e-33	8686.54	8816.87	9398.27	5473.37	5927.8	5796.96
904	SSBP4	3195.18	0.682903	0.0554684	12.3116	7.84832e-35	1.4489e-33	2416.12	2373.74	2568.91	3928.04	4061.9	3822.36
905	ID2	2161.31	-0.779784	0.0633591	-12.3074	8.26738e-35	1.52458e-33	2548.75	2786.52	2859.98	1586.15	1534.8	1651.67
906	ADD2	3111.83	0.703762	0.0572084	12.3017	8.86721e-35	1.63159e-33	2372.57	2311.37	2418.71	3973.84	3970.15	3624.32
907	SH3KBP1	3392.81	0.618341	0.0502644	12.3018	8.86102e-35	1.63159e-33	2630.91	2715.24	2683.89	4076.4	4121.73	4128.7
908	PYGL	3576.29	0.626528	0.0509364	12.3002	9.03541e-35	1.66071e-33	2809.07	2873.63	2752.26	4319.35	4271.32	4432.11
909	OAZ1	17961.6	0.768827	0.0625093	12.2994	9.12562e-35	1.67544e-33	12995.2	12394.3	14468.8	21398.6	24258.7	22254.2
910	PRPS1	3098.48	0.665613	0.0541502	12.292	1.00033e-34	1.83456e-33	2384.44	2319.29	2485.01	3794.62	3896.35	3711.15
911	TTC14	466.92	-1.45069	0.118044	-12.2894	1.03284e-34	1.89211e-33	668.119	778.047	604.937	266.848	209.428	274.141
912	ZYX	8369.02	0.67239	0.0547469	12.2818	1.13455e-34	2.07616e-33	6630.71	6022.44	6707.13	10482.7	10534.2	9836.88
913	ZNF83	535.39	-1.14351	0.0931981	-12.2697	1.31738e-34	2.40808e-33	722.559	749.34	739.597	345.508	302.174	353.164
914	CBX2	2810.16	-0.708548	0.0577805	-12.2628	1.43535e-34	2.62085e-33	3472.24	3318.08	3670.02	2123.83	2189.02	2087.76
915	MYO15B	302.105	-1.56682	0.127785	-12.2614	1.45946e-34	2.66196e-33	461.25	401.892	492.029	170.265	151.586	135.607
916	AXIN1	3272.76	0.676859	0.0552853	12.243	1.83072e-34	3.33546e-33	2559.64	2381.65	2615.52	4047.52	4090.82	3941.38
917	GIPC1	4683.92	0.737468	0.0602432	12.2415	1.86528e-34	3.39472e-33	3652.39	3205.24	3679.34	5780.04	6077.39	5709.15
918	CHCHD3	1946.25	0.723365	0.0590987	12.2399	1.90163e-34	3.45711e-33	1412.45	1490.76	1501.98	2367.78	2433.35	2471.17
919	EPS8L2	4063.67	-0.791818	0.0647601	-12.227	2.23141e-34	4.05223e-33	5036.14	4783.11	5636.06	3090.66	3009.77	2826.28
920	SOX4	8587.33	-0.6083	0.04976	-12.2247	2.29523e-34	4.16359e-33	10521.6	10638.3	9953.49	6971.9	6906.12	6532.55
921	SCUBE3	296.151	-1.42635	0.116686	-12.2238	2.32079e-34	4.2054e-33	434.525	429.609	430.914	162.299	159.564	159.997
922	ZPR1	1297.91	0.864346	0.0707352	12.2195	2.44709e-34	4.42945e-33	871.03	887.924	1002.7	1663.82	1709.33	1652.65
923	TSPAN7	986.25	-0.922525	0.0755176	-12.216	2.55284e-34	4.61586e-33	1326.34	1264.08	1283.42	625.3	711.056	707.303
924	MRPS30	1793.25	0.796408	0.0652909	12.1978	3.19146e-34	5.76432e-33	1274.87	1346.24	1310.35	2130.8	2413.4	2283.86
925	CYFIP2	8776.07	-0.591345	0.0485038	-12.1917	3.44033e-34	6.2071e-33	10415.7	10665	10568.8	7334.33	6941.03	6731.57
926	METRN	1463.07	0.903001	0.0741376	12.1801	3.96926e-34	7.15367e-33	960.112	1014.63	1084.54	1738.49	1986.57	1994.11
927	BTG1	2504.32	0.741259	0.0608939	12.173	4.33094e-34	7.7971e-33	1877.66	1777.83	1969.15	3107.58	3284.02	3009.7
928	ZNF514	821.069	-0.933256	0.0766741	-12.1717	4.39721e-34	7.90787e-33	1071.96	1059.17	1102.15	547.635	590.386	555.111
929	CNBP	6733.9	0.579857	0.0476685	12.1644	4.81084e-34	8.64242e-33	5331.1	5495.82	5368.81	7803.31	8112.82	8291.54
930	RNF44	2302.09	0.849338	0.0698845	12.1534	5.4997e-34	9.86929e-33	1762.85	1503.63	1663.58	3120.53	3012.77	2749.21
931	SH3BGRL	953.745	-0.967214	0.0796743	-12.1396	6.51472e-34	1.16782e-32	1193.71	1345.25	1247.16	650.193	598.364	687.791
932	NOL7	1291.7	0.797643	0.0657301	12.1351	6.88041e-34	1.23205e-32	927.449	928.509	974.735	1604.07	1632.54	1682.89
933	PRELID3A	338.201	1.3952	0.115027	12.1293	7.38488e-34	1.32097e-32	196.971	163.33	198.883	469.971	496.642	503.405
934	MCRIP2	921.368	0.945606	0.0779701	12.1278	7.52361e-34	1.34434e-32	605.762	612.737	671.231	1156.01	1282.49	1199.98
935	TNRC6B	2221.22	-0.854852	0.0705305	-12.1203	8.24458e-34	1.47159e-32	2877.37	3128.03	2576.16	1631.95	1556.74	1557.04
936	JAG1	1430.73	0.832411	0.0686825	12.1197	8.30669e-34	1.48109e-32	1095.72	1025.52	965.413	1911.75	1782.13	1803.87
937	NACC2	3177.48	-0.681106	0.056222	-12.1146	8.84129e-34	1.57473e-32	4036.43	3711.07	3994.24	2428.51	2517.12	2377.51
938	MLLT11	1281.78	-0.849428	0.0701182	-12.1142	8.87986e-34	1.57992e-32	1656.94	1628.35	1660.47	852.32	986.304	906.323
939	ELK1	4863.62	0.582214	0.0480687	12.1121	9.10981e-34	1.6191e-32	3947.35	3792.24	3946.59	5853.72	5881.92	5759.88
940	ZNF471	184.476	-1.85772	0.153451	-12.1063	9.77982e-34	1.73633e-32	297.932	293.005	276.572	68.7034	85.7656	84.8764
941	CACNA2D3	341.797	-1.32608	0.109668	-12.0917	1.16833e-33	2.07208e-32	502.822	470.194	493.065	193.166	194.468	197.069
942	HDGF	16771.1	0.635136	0.0525685	12.0821	1.31373e-33	2.32747e-32	13100.1	12502.2	13812	20258.5	21381.6	19572.3
943	XPC	1815.91	-0.872063	0.0722506	-12.07	1.52173e-33	2.69313e-32	2403.25	2238.12	2404.21	1321.29	1384.22	1144.37
944	AUP1	4595.39	0.691989	0.0573367	12.0689	1.54253e-33	2.72705e-32	3380.19	3426.97	3735.28	5702.38	5920.82	5406.72
945	LGMN	2259.43	0.715655	0.0593409	12.0601	1.71639e-33	3.0312e-32	1681.68	1645.18	1804.45	2742.16	2886.11	2797.02
946	CXXC4	478.265	-1.1899	0.0987356	-12.0514	1.90798e-33	3.366e-32	676.038	709.745	609.08	295.723	291.204	287.799
947	RIPK1	423.782	-1.19805	0.0994597	-12.0455	2.04712e-33	3.60765e-32	604.772	588.979	576.969	261.869	263.28	246.824
948	SLC31A1	3817.54	0.665649	0.0552994	12.0372	2.26603e-33	3.98922e-32	2970.41	3086.45	2798.87	4588.19	4847.75	4613.57
949	EGFR	1230.8	0.883858	0.073439	12.0353	2.31874e-33	4.0777e-32	877.958	899.802	817.286	1704.64	1494.91	1590.21
950	PCF11	693.776	-0.980905	0.0815511	-12.0281	2.52918e-33	4.4431e-32	927.449	941.377	893.939	479.928	447.776	472.186
951	SPRY1	403.465	1.26759	0.105683	11.9942	3.81107e-33	6.688e-32	221.717	248.46	240.317	594.433	528.555	587.305
952	PROCR	1098.91	0.983419	0.0819941	11.9938	3.83059e-33	6.71519e-32	717.61	692.917	804.856	1390.99	1384.22	1602.89
953	AKAP1	2604.41	0.672356	0.0560733	11.9907	3.97686e-33	6.96431e-32	2099.38	1955.02	1970.19	3148.41	3273.05	3180.42
954	PLXNA3	1403.81	-0.813766	0.0678757	-11.9891	4.05473e-33	7.09322e-32	1856.88	1691.71	1819.99	1013.62	1063.09	977.541
955	ZFHX3	1677.56	-0.849303	0.0708559	-11.9863	4.19073e-33	7.32347e-32	2094.43	2288.61	2089.31	1306.36	1161.82	1124.86
956	SLC39A8	1512.89	-0.855815	0.0714014	-11.986	4.20901e-33	7.34772e-32	2048.9	1977.78	1819.99	1045.49	1025.2	1159.98
957	PTPRH	239.664	1.63725	0.136673	11.9793	4.56146e-33	7.95467e-32	121.746	106.907	121.195	369.405	390.931	327.798
958	RPF2	696.138	1.06462	0.0889439	11.9696	5.12706e-33	8.93169e-32	478.077	458.315	414.34	908.079	897.547	1020.47
959	B4GALT6	304.934	-1.51504	0.126602	-11.967	5.29242e-33	9.21013e-32	465.209	466.234	423.663	157.321	184.496	132.68
960	KARS	3987.31	0.608178	0.0508486	11.9606	5.71726e-33	9.9391e-32	3204	3068.63	3204.92	4895.86	4683.2	4867.22
961	SDK1	1127.91	-0.91869	0.076834	-11.9568	5.98129e-33	1.03873e-31	1481.74	1444.24	1499.91	855.307	783.857	702.425
962	PPP1R12B	507.654	-1.19174	0.099687	-11.9548	6.1252e-33	1.06261e-31	718.6	698.856	701.271	305.68	272.256	349.261
963	EIF3I	8433.55	0.677627	0.0567055	11.9499	6.49694e-33	1.12477e-31	6313.98	6171.91	6980.6	10399.1	10791.5	9944.19
964	TMEM87B	721.298	1.02327	0.0856289	11.95	6.49028e-33	1.12477e-31	505.791	489.991	430.914	928.989	962.369	1009.74
965	KCMF1	2226.88	0.749346	0.0627393	11.9438	6.99485e-33	1.20971e-31	1571.81	1745.16	1666.68	2659.52	2924.01	2794.09
966	ARHGAP45	628.342	1.0738	0.0899084	11.9433	7.03743e-33	1.21582e-31	385.035	381.104	448.523	858.294	877.601	819.496
967	CCND3	2747.97	0.690302	0.0578262	11.9375	7.54379e-33	1.30195e-31	2199.35	1988.67	2120.39	3451.1	3439.6	3288.71
968	ZC3H15	1401.03	0.96573	0.0809189	11.9345	7.81817e-33	1.34791e-31	888.846	1024.53	933.301	1861.96	1663.45	2034.11
969	MRPS34	5097.4	0.733697	0.0614948	11.931	8.15439e-33	1.40442e-31	3741.47	3573.47	4171.37	6101.65	6622.9	6373.53
970	FAM83G	966.863	0.899847	0.0754551	11.9256	8.70583e-33	1.49785e-31	679.997	651.342	692.984	1337.23	1241.61	1198.02
971	SQSTM1	6569.32	0.648731	0.0544184	11.9212	9.17979e-33	1.57777e-31	5094.53	4976.13	5279.73	7773.44	8557.61	7734.48
972	ATM	703.337	-1.095	0.0918672	-11.9194	9.38123e-33	1.60908e-31	1001.68	1006.71	865.971	431.138	421.847	492.673
973	CMSS1	1057.91	0.863054	0.0724072	11.9194	9.37327e-33	1.60908e-31	756.212	709.745	786.211	1318.31	1366.27	1410.7
974	RRAGB	277.74	-1.49173	0.125306	-11.9047	1.11835e-32	1.91624e-31	441.454	411.791	376.014	146.368	138.621	152.192
975	NDUFA4L2	80.2631	3.90165	0.327976	11.8962	1.23931e-32	2.12132e-31	2.96942	11.8786	15.5378	128.445	171.531	151.216
976	METTL1	497.621	1.22466	0.102976	11.8927	1.29194e-32	2.20914e-31	280.115	271.227	343.902	712.922	719.035	658.523
977	FUCA2	3182.36	0.620213	0.0521675	11.8889	1.35215e-32	2.30973e-31	2482.43	2470.74	2573.05	3841.41	3940.23	3786.27
978	PRPF4B	1148.83	-0.88779	0.0746901	-11.8863	1.39428e-32	2.37925e-31	1448.09	1611.53	1414.97	804.526	772.887	840.959
979	ATP1B3	4020.93	0.626527	0.0527133	11.8856	1.40669e-32	2.39799e-31	3063.45	3204.25	3216.32	4809.23	5085.1	4747.22
980	NUP155	5972.72	0.695592	0.0585247	11.8854	1.40904e-32	2.39953e-31	4601.61	4822.7	4255.27	7755.51	7022.8	7378.39
981	TIMM13	2287.28	0.758452	0.0638141	11.8853	1.41062e-32	2.39978e-31	1737.11	1571.93	1789.95	2826.79	3005.78	2792.14
982	KBTBD7	251.911	-1.55516	0.130885	-11.8819	1.47018e-32	2.49602e-31	406.81	357.347	363.584	129.441	118.676	135.607
983	NPC1	2151.1	0.660934	0.0556251	11.8819	1.4693e-32	2.49602e-31	1685.64	1651.12	1663.58	2667.48	2640.78	2598
984	HIPK3	1346.65	-1.01009	0.0850386	-11.878	1.54004e-32	2.61196e-31	1874.69	1983.72	1540.31	920.028	862.642	898.519
985	ROBO1	3970.94	-0.749829	0.0631529	-11.8732	1.63025e-32	2.76215e-31	4952.99	5406.73	4580.53	3068.75	2880.13	2936.53
986	H3F3B	14179.2	0.519854	0.0438071	11.8669	1.75924e-32	2.97768e-31	11555	11484.6	11916.4	16507.7	16516.9	17094.3
987	SEC31B	270.955	-1.56	0.131516	-11.8617	1.8709e-32	3.16347e-31	426.607	352.398	435.057	145.372	132.637	133.656
988	MAFG	3041.73	0.703179	0.059321	11.8538	2.0568e-32	3.47429e-31	2342.87	2223.27	2378.31	3770.72	3981.12	3554.08
989	PPP5C	5712.82	0.596459	0.0503327	11.8503	2.14339e-32	3.61689e-31	4552.12	4375.28	4718.3	6875.31	7047.74	6708.16
990	TRIM22	81.1091	-3.45782	0.291912	-11.8454	2.27196e-32	3.82997e-31	136.593	163.33	146.055	10.9527	20.9428	8.78031
991	H2AFY	9271.08	0.586644	0.049543	11.8411	2.39259e-32	4.02926e-31	7395.83	7253.85	7585.53	10915.9	11698	10777.3
992	CGNL1	852.555	-0.951558	0.0803631	-11.8407	2.40376e-32	4.04399e-31	1172.92	1149.25	1049.32	618.33	568.446	557.062
993	TP53I3	247.194	-1.5078	0.127355	-11.8393	2.44384e-32	4.10728e-31	362.269	365.266	369.799	126.454	128.648	130.729
994	ZNF618	4306.6	-0.605076	0.0511221	-11.8359	2.54606e-32	4.27477e-31	5299.42	5215.68	5074.63	3550.67	3356.82	3342.37
995	EMC8	1004.48	0.851395	0.0719414	11.8346	2.58705e-32	4.33922e-31	718.6	682.028	748.92	1268.52	1305.43	1303.39
996	DUS3L	919.083	0.921115	0.077865	11.8296	2.74309e-32	4.59633e-31	624.568	595.909	685.733	1192.85	1250.58	1164.85
997	DYNC1LI1	1339.69	0.783298	0.0662168	11.8293	2.75473e-32	4.61121e-31	976.939	1016.61	960.234	1650.87	1767.17	1666.31
998	UTP18	1572.22	0.76799	0.0649252	11.8289	2.76904e-32	4.63052e-31	1129.37	1203.7	1157.05	1875.9	2022.47	2044.84
999	LUC7L	1077.05	-0.894203	0.0755961	-11.8287	2.77452e-32	4.63504e-31	1384.74	1326.44	1490.59	732.836	803.803	723.888
1000	ADAMTS2	1786.64	-0.732854	0.0619751	-11.825	2.89956e-32	4.83907e-31	2250.82	2184.67	2257.12	1322.29	1418.12	1286.8
1001	LARS	4449.8	0.675079	0.0570923	11.8243	2.92167e-32	4.87111e-31	3424.73	3631.87	3224.6	5656.58	5260.62	5500.38
1002	SUPV3L1	1494.64	0.759846	0.0642626	11.8241	2.931e-32	4.88178e-31	1098.69	1068.08	1163.26	1912.74	1895.82	1829.23
1003	CCDC120	928.923	-0.889716	0.0752676	-11.8207	3.05134e-32	5.07715e-31	1245.18	1151.23	1223.34	657.163	676.152	620.475
1004	TPP1	6796.92	-0.638442	0.0540574	-11.8104	3.44747e-32	5.73055e-31	8116.41	8338.76	8374.85	5397.69	5601.69	4952.1
1005	TMEM147	2307.48	0.748632	0.063392	11.8096	3.48333e-32	5.7844e-31	1649.02	1657.06	1860.39	2782.98	2914.03	2981.4
1006	TUBB2A	848.24	1.01266	0.0857649	11.8074	3.57335e-32	5.928e-31	596.853	541.465	547.965	1177.91	1207.7	1017.54
1007	FAM86C1	517.278	1.11869	0.094746	11.8073	3.58073e-32	5.93433e-31	303.871	317.752	357.368	705.952	728.01	690.718
1008	PODXL2	3738.36	0.788584	0.0668123	11.803	3.76779e-32	6.23815e-31	2731.87	2503.41	2989.47	4684.77	5018.28	4502.35
1009	ENPP2	206.111	-1.71417	0.14524	-11.8024	3.79533e-32	6.27753e-31	345.442	301.914	300.397	103.553	89.7547	95.6078
1010	COPRS	1472	0.851371	0.0722098	11.7902	4.38272e-32	7.2419e-31	991.786	1008.69	1149.79	1793.26	1962.64	1925.82
1011	SFXN4	1214.9	0.867519	0.073612	11.785	4.66319e-32	7.69773e-31	861.132	786.956	933.301	1524.42	1580.68	1602.89
1012	PAICS	7844.95	0.593107	0.0503574	11.778	5.07098e-32	8.36261e-31	6083.35	6563.9	6116.7	9474.09	9147	9684.68
1013	NOTCH3	5968.41	-0.615206	0.0522515	-11.7739	5.31752e-32	8.76053e-31	7359.21	7062.8	7243.7	4826.16	4878.66	4439.91
1014	ZNF780B	337.535	-1.38904	0.118064	-11.7651	5.90434e-32	9.71771e-31	466.199	512.759	486.85	179.226	165.547	214.63
1015	SOX6	504.46	-1.20155	0.102196	-11.7573	6.47954e-32	1.06539e-30	784.917	680.049	644.299	299.706	325.111	292.677
1016	PKD2	777.106	-0.908285	0.0772619	-11.7559	6.58389e-32	1.08148e-30	1030.39	1008.69	1002.7	558.588	531.547	530.721
1017	ADAMTS13	611.325	-1.09549	0.0931955	-11.7547	6.67888e-32	1.09601e-30	825.499	799.824	873.222	428.151	394.921	346.335
1018	PUSL1	1160.67	0.872953	0.0742866	11.7512	6.96627e-32	1.14204e-30	776.008	810.713	873.222	1452.73	1602.62	1448.75
1019	MATK	298.494	1.4406	0.122635	11.747	7.31331e-32	1.19776e-30	168.267	158.381	155.378	442.091	472.708	394.138
1020	KLF15	303.498	1.42328	0.121261	11.7373	8.20655e-32	1.34274e-30	162.328	157.391	175.059	458.022	399.907	468.283
1021	RPF1	1132.88	0.810802	0.0691163	11.731	8.84198e-32	1.44529e-30	848.264	842.389	776.888	1449.74	1438.07	1441.92
1022	RGS16	932.882	0.856964	0.0731293	11.7185	1.02508e-31	1.67393e-30	677.028	661.241	652.586	1223.72	1226.65	1156.07
1023	PLRG1	1444.89	0.771284	0.0658227	11.7176	1.03564e-31	1.68952e-30	1115.51	1078.97	1007.88	1851.01	1769.16	1846.79
1024	DCAF6	1029.09	-0.914199	0.0780226	-11.7171	1.04169e-31	1.69773e-30	1301.6	1457.11	1275.13	738.81	671.165	730.717
1025	SIX2	301.653	-1.43012	0.122079	-11.7147	1.07161e-31	1.74479e-30	398.892	436.538	484.778	162.299	161.558	165.85
1026	ZFR	8419.6	0.76235	0.0650861	11.7129	1.09415e-31	1.77975e-30	6270.42	6881.66	5583.24	10562.4	10310.8	10909.1
1027	TCIM	81.6789	3.19666	0.272928	11.7124	1.10061e-31	1.78852e-30	15.8369	17.8179	14.5019	140.394	137.624	163.899
1028	PFDN2	834.776	0.940643	0.080393	11.7005	1.26632e-31	2.0558e-30	542.414	582.05	591.471	1023.58	1117.94	1151.2
1029	RANBP1	6406.99	0.68455	0.0585102	11.6997	1.27928e-31	2.07482e-30	4822.34	4673.23	5249.69	7507.58	8353.17	7835.94
1030	NHSL1	724.311	1.00336	0.0858058	11.6934	1.37827e-31	2.2332e-30	494.903	512.759	438.165	1008.64	974.337	917.055
1031	MAPKAPK3	2696.53	0.689729	0.0589889	11.6925	1.3917e-31	2.25278e-30	2112.25	1949.08	2130.74	3336.59	3451.57	3198.96
1032	SLC45A3	423.714	1.19251	0.102024	11.6886	1.4585e-31	2.35862e-30	276.156	235.592	262.07	591.446	604.348	572.671
1033	NOL10	1172.13	0.842511	0.0721518	11.6769	1.67229e-31	2.70172e-30	809.662	894.853	813.143	1557.28	1428.1	1529.73
1034	PDIA3	13068.9	0.543918	0.0465838	11.6761	1.68816e-31	2.72472e-30	10377.1	10488.8	11037	15101.8	15862.6	15546
1035	COMT	2268.33	0.708728	0.0607666	11.6631	1.96708e-31	3.17184e-30	1697.52	1643.2	1826.2	2728.22	2908.05	2806.77
1036	TTC27	501.965	1.08004	0.0926079	11.6625	1.98192e-31	3.19269e-30	321.687	334.58	310.755	664.132	681.138	699.498
1037	PCK1	280.713	-1.47281	0.126295	-11.6616	2.0019e-31	3.22177e-30	403.841	435.548	398.803	164.291	127.651	154.143
1038	KNTC1	1348.56	-0.844318	0.0724092	-11.6604	2.03149e-31	3.26624e-30	1683.66	1835.24	1678.08	948.903	904.528	1040.95
1039	HPCAL1	1755.95	0.792327	0.0679705	11.6569	2.11525e-31	3.39764e-30	1241.22	1242.3	1373.54	2162.66	2376.5	2139.47
1040	ZKSCAN1	2867.62	-0.773274	0.0664344	-11.6397	2.59048e-31	4.15698e-30	3629.62	3935.77	3288.83	2180.58	2077.32	2093.62
1041	YWHAZ	20199.5	0.526504	0.045244	11.637	2.67267e-31	4.28474e-30	16468.4	17075.5	16117.8	23159	24037.3	24339
1042	TIPARP	1272.12	0.817969	0.0702998	11.6354	2.72203e-31	4.35969e-30	869.05	982.952	910.513	1659.83	1556.74	1653.63
1043	CACYBP	2303.39	0.730569	0.0628207	11.6294	2.92025e-31	4.67189e-30	1651	1794.65	1751.62	2727.22	2842.23	3053.6
1044	LTBP2	966.872	-0.898792	0.0772864	-11.6294	2.92256e-31	4.67189e-30	1320.4	1219.53	1235.77	700.973	704.076	620.475
1045	WDR12	810.237	0.936489	0.0805698	11.6233	3.13701e-31	5.0099e-30	540.434	526.617	601.829	1092.28	1023.2	1077.05
1046	ZNRD2	1438.55	0.881934	0.0759579	11.6108	3.63093e-31	5.79317e-30	960.112	986.912	1089.71	1690.7	1952.66	1951.18
1047	PTGES	490.237	1.18225	0.101851	11.6076	3.77009e-31	6.00946e-30	309.809	278.157	311.791	695.995	732.996	612.671
1048	CDH2	3702.39	0.604944	0.0521267	11.6053	3.87511e-31	6.17096e-30	3023.86	2984.49	2803.01	4469.7	4477.76	4455.52
1049	PSMD8	8927.77	0.620632	0.0534833	11.6042	3.92239e-31	6.2403e-30	6719.8	6853.94	7536.85	10523.6	11003.9	10928.6
1050	NAB1	758.732	-0.963848	0.0830789	-11.6016	4.04413e-31	6.42785e-30	1017.52	1050.26	941.588	480.923	523.569	538.526
1051	SNX29	1365.7	-0.826567	0.0712536	-11.6004	4.1035e-31	6.51601e-30	1853.91	1665.97	1719.51	992.714	1040.16	921.933
1052	CD151	6261.22	0.72061	0.062139	11.5967	4.28105e-31	6.79149e-30	4665.95	4322.81	5199.97	7623.09	7930.32	7825.21
1053	TNRC18	3037.7	-0.695972	0.0600351	-11.5928	4.48448e-31	7.10746e-30	3870.14	3564.56	3834.72	2386.69	2398.44	2171.66
1054	NOCT	475.792	1.16699	0.100675	11.5917	4.54265e-31	7.19281e-30	298.922	272.217	308.684	710.93	611.329	652.67
1055	FBXL18	1300.02	-0.817499	0.0705676	-11.5846	4.93159e-31	7.80126e-30	1704.45	1544.21	1727.8	952.886	969.35	901.445
1056	NAGLU	1600.28	0.74478	0.0643118	11.5808	5.1582e-31	8.15201e-30	1208.55	1143.31	1236.81	1969.5	2094.28	1949.23
1057	DUS1L	4716.1	0.604679	0.0522557	11.5715	5.74369e-31	9.06873e-30	3676.14	3634.84	3915.52	5612.77	5877.93	5579.4
1058	RAB35	2630.86	0.657342	0.0568412	11.5645	6.23262e-31	9.8314e-30	2094.43	1960.96	2069.63	3218.1	3329.9	3112.13
1059	GORASP2	3742.64	0.599039	0.0518135	11.5615	6.45972e-31	1.018e-29	2992.19	3038.94	2898.31	4642.95	4384.02	4499.42
1060	NLN	1213.87	0.91056	0.0787677	11.5601	6.56521e-31	1.03365e-29	813.621	944.347	770.673	1572.21	1525.83	1656.55
1061	STUM	273.963	-1.45494	0.12594	-11.5526	7.16197e-31	1.12654e-29	393.943	390.013	420.555	128.445	161.558	149.265
1062	ZNF776	563.296	-1.06542	0.0922392	-11.5506	7.32881e-31	1.1517e-29	800.753	763.199	723.024	368.409	337.079	387.309
1063	PRELID3B	3061.46	0.642556	0.0556327	11.55	7.38434e-31	1.15933e-29	2315.16	2499.45	2357.6	3706.99	3633.07	3856.51
1064	ST6GALNAC4	1119.72	0.856863	0.0741987	11.5482	7.53753e-31	1.18227e-29	838.366	738.452	813.143	1493.55	1467.99	1366.8
1065	TCF25	4452.86	-0.722305	0.0625849	-11.5412	8.17678e-31	1.28134e-29	5439.98	5212.72	5982.04	3361.49	3548.3	3172.62
1066	CALCB	159.218	1.94349	0.168403	11.5407	8.22221e-31	1.28604e-29	56.419	67.3119	73.5454	234.985	275.248	247.8
1067	TBX1	2125.09	0.785441	0.0680578	11.5408	8.21662e-31	1.28604e-29	1609.43	1502.64	1569.31	2576.87	2948.94	2543.36
1068	TRIB1	792.975	0.897134	0.0777368	11.5407	8.23006e-31	1.28606e-29	584.976	540.475	536.571	1020.59	1039.16	1036.08
1069	RPN1	12011.6	0.543467	0.0470937	11.5401	8.28198e-31	1.29296e-29	9710	9447.43	10170	14575.1	13994.7	14172.4
1070	KIAA0232	1335.25	-0.943388	0.0818215	-11.5298	9.33275e-31	1.45565e-29	1770.76	1952.05	1547.56	932.972	871.618	936.567
1071	FTL	36232.9	0.664664	0.0576715	11.525	9.8706e-31	1.5381e-29	26819.8	26811.9	30462.3	42563.2	46679.4	44060.6
1072	PKN1	11866.7	0.632753	0.054943	11.5166	1.08884e-30	1.69511e-29	9187.38	8788.17	9941.06	14301.3	15045.9	13936.3
1073	ASPH	2317.35	0.724828	0.0630085	11.5037	1.2645e-30	1.96676e-29	1748	1847.12	1645.97	2833.76	2786.38	3042.87
1074	CHCHD4	575.415	1.01805	0.0885383	11.4984	1.34349e-30	2.08766e-29	384.045	380.114	377.05	730.844	806.795	773.643
1075	ARHGAP22	391.075	1.20877	0.105231	11.4869	1.53577e-30	2.38423e-29	248.441	215.794	244.461	565.558	539.525	532.672
1076	NR2C2AP	420.224	1.17469	0.102294	11.4835	1.5967e-30	2.47652e-29	270.217	232.622	271.393	575.515	579.416	592.183
1077	C4orf3	561.774	-1.01676	0.0886072	-11.4749	1.76345e-30	2.73261e-29	784.917	737.462	733.382	372.392	362.01	380.48
1078	DDX49	2463.3	0.797051	0.0694804	11.4716	1.8325e-30	2.83697e-29	1764.82	1650.13	1984.69	3139.44	3270.06	2970.67
1079	HPCAL4	490.996	1.10664	0.0964835	11.4698	1.87157e-30	2.89478e-29	295.952	300.924	337.687	697.986	641.247	672.182
1080	VAPA	3428.04	0.594336	0.0518398	11.4649	1.98055e-30	3.0605e-29	2737.8	2778.6	2678.71	4031.59	4094.81	4246.74
1081	TEAD4	2187.02	0.71931	0.062741	11.4648	1.98315e-30	3.06168e-29	1606.46	1567.97	1784.77	2714.28	2780.4	2668.24
1082	TAF6L	1124.78	-0.838811	0.0732489	-11.4515	2.31062e-30	3.56396e-29	1455.02	1375.94	1497.84	750.758	848.68	820.471
1083	CCT3	11161	0.560849	0.0490099	11.4436	2.53221e-30	3.90212e-29	9019.12	8592.17	9444.89	13251.8	13556.9	13101.2
1084	IL7R	81.5616	3.00562	0.262665	11.4428	2.5546e-30	3.933e-29	21.7757	18.8077	13.4661	144.377	144.605	146.339
1085	RNF41	2540.33	0.695012	0.0607404	11.4423	2.56866e-30	3.95101e-29	1996.44	1819.4	2004.37	3274.86	3126.45	3020.43
1086	AP3S1	1974.64	0.703551	0.0615119	11.4376	2.71188e-30	4.16745e-29	1520.34	1500.66	1486.45	2303.06	2483.21	2554.1
1087	YPEL3	834.657	-0.962576	0.0841599	-11.4375	2.71713e-30	4.17169e-29	1100.66	1033.44	1175.69	526.726	616.315	555.111
1088	IFI44L	106.022	-2.54783	0.223043	-11.4231	3.20645e-30	4.91842e-29	191.033	199.956	152.27	30.8667	24.9319	37.0724
1089	TOX2	2887.42	0.809665	0.0708985	11.4201	3.32027e-30	5.08834e-29	2228.05	2000.55	2064.45	3754.79	3982.12	3294.57
1090	TWF2	1468.82	0.742911	0.0650554	11.4197	3.33504e-30	5.10628e-29	1056.12	1091.84	1148.76	1782.3	1897.81	1836.06
1091	PCDH18	303.831	-1.59813	0.139955	-11.4189	3.3659e-30	5.14881e-29	447.393	534.536	388.444	134.42	141.613	176.582
1092	POFUT1	4975.06	0.574166	0.0502943	11.4161	3.47365e-30	5.30877e-29	3965.16	3902.11	4126.83	6068.8	6028.52	5758.91
1093	NUDC	7524.98	0.7782	0.0681742	11.4149	3.52409e-30	5.38093e-29	5299.42	5148.37	6182.99	9018.06	10184.2	9316.89
1094	SULF2	6950.05	-0.535865	0.0469951	-11.4026	4.05903e-30	6.19206e-29	8425.23	8087.33	8165.61	5792.99	5702.41	5526.72
1095	YLPM1	4244.41	-0.588425	0.0516209	-11.399	4.23142e-30	6.44915e-29	5050.98	5225.58	5017.66	3530.76	3350.84	3290.67
1096	SLC35C2	2752.63	0.650587	0.0570883	11.3961	4.37065e-30	6.65527e-29	2146.89	2048.06	2232.26	3369.45	3464.53	3254.57
1097	CTCFL	172.657	-1.84526	0.162062	-11.3861	4.90206e-30	7.45766e-29	241.513	283.106	285.895	79.6561	63.8255	81.9496
1098	EIF3D	9799.43	0.599625	0.0526843	11.3815	5.17218e-30	7.86143e-29	7644.28	7488.45	8243.3	11591	12330.3	11499.3
1099	UBQLN1	4352.68	0.611669	0.0537714	11.3754	5.54771e-30	8.42454e-29	3361.38	3567.53	3401.73	5286.18	5024.27	5475.01
1100	MYCL	423.808	1.1359	0.0998588	11.3751	5.56367e-30	8.4411e-29	260.319	253.41	281.751	594.433	573.433	579.501
1101	USP7	6961.45	0.555671	0.0488659	11.3713	5.80898e-30	8.80528e-29	5768.59	5743.29	5398.85	8480.38	8136.76	8240.81
1102	C8orf33	2138.85	0.700102	0.061615	11.3625	6.42619e-30	9.732e-29	1625.26	1571.93	1692.58	2594.8	2798.35	2550.19
1103	PDAP1	4141.86	0.644089	0.0566877	11.3621	6.46017e-30	9.7746e-29	3164.41	3071.6	3461.81	5023.31	5182.83	4947.22
1104	BRPF3	2814.84	-0.593907	0.0522745	-11.3613	6.5152e-30	9.84892e-29	3442.55	3359.66	3356.16	2252.28	2262.81	2215.57
1105	SSR3	3457.74	0.604318	0.0532075	11.3578	6.78644e-30	1.02497e-28	2816.99	2787.51	2626.92	4111.25	4130.71	4273.09
1106	C1R	1214.43	-0.830328	0.0732152	-11.3409	8.22696e-30	1.24029e-28	1553.01	1444.24	1666.68	889.161	892.56	840.959
1107	KIAA1109	825.235	-1.16725	0.102923	-11.341	8.22137e-30	1.24029e-28	1151.14	1271.01	1003.74	539.67	426.833	559.013
1108	MYLK	1281.87	-0.798328	0.0704004	-11.3398	8.33105e-30	1.25485e-28	1604.48	1740.21	1538.24	965.83	921.481	920.957
1109	GOLGA8B	370.401	-1.19501	0.10539	-11.3389	8.42282e-30	1.26752e-28	511.73	529.587	505.495	228.015	214.414	233.166
1110	ANKRD63	608.9	-1.02555	0.0904517	-11.3381	8.5005e-30	1.27806e-28	814.611	785.966	849.398	372.392	440.795	390.236
1111	RRAS2	1497.3	0.756266	0.0667227	11.3345	8.85757e-30	1.33055e-28	1157.08	1145.29	1037.92	1822.13	1882.85	1938.5
1112	PDZD2	701.494	-0.991493	0.0874929	-11.3323	9.0825e-30	1.36311e-28	911.612	1018.59	870.115	478.932	447.776	481.942
1113	CCDC124	3790.99	0.737093	0.0650446	11.3321	9.09803e-30	1.36421e-28	2857.57	2584.58	3087.87	4553.34	4950.47	4712.1
1114	TMEM192	1097.12	0.873406	0.0771002	11.3282	9.51468e-30	1.42541e-28	759.182	857.237	707.486	1414.89	1395.19	1448.75
1115	DNAJB11	2486.59	0.620034	0.0547437	11.3261	9.74169e-30	1.45811e-28	1963.78	1944.13	1973.3	2955.24	2975.87	3107.25
1116	LMOD1	241.132	-1.4834	0.130974	-11.3259	9.76349e-30	1.46006e-28	353.361	343.489	368.763	134.42	131.64	115.12
1117	NCLN	5700.92	0.640991	0.056599	11.3251	9.85323e-30	1.47216e-28	4463.04	4167.4	4734.87	6844.45	7221.26	6774.5
1118	SEC16A	13969.3	-0.558539	0.049335	-11.3214	1.02868e-29	1.53557e-28	16789.1	16567.6	16563.3	11757.2	11513.5	10625.2
1119	DMRT1	84.7996	3.0075	0.26585	11.3128	1.13417e-29	1.69153e-28	23.7554	13.8583	18.6453	141.39	176.518	134.631
1120	TMEM120B	1375.46	0.806385	0.071285	11.3121	1.14294e-29	1.70308e-28	1015.54	931.478	1055.53	1801.22	1806.06	1642.89
1121	ST3GAL4	911.576	0.907389	0.0802426	11.3081	1.19688e-29	1.78186e-28	587.945	622.635	691.948	1135.1	1241.61	1190.22
1122	RFTN1	660.972	0.975397	0.0863085	11.3013	1.29306e-29	1.92334e-28	437.494	464.254	435.057	867.255	935.443	826.325
1123	IL1RAP	535.233	1.04858	0.0927982	11.2995	1.31925e-29	1.96054e-28	353.361	352.398	340.795	723.874	674.157	766.814
1124	C20orf27	4767.17	0.739102	0.0654112	11.2993	1.3225e-29	1.96363e-28	3566.27	3299.27	3851.29	5676.49	6425.44	5784.27
1125	DHFR	4015.12	-0.592038	0.0524311	-11.2917	1.44178e-29	2.13884e-28	4706.53	5021.67	4754.55	3245.98	3103.52	3258.47
1126	RPS6KA2	1531.44	0.722857	0.0640414	11.2873	1.51565e-29	2.24642e-28	1165	1135.39	1166.37	1973.48	1936.71	1811.67
1127	PPID	905.829	0.847069	0.0751097	11.2778	1.69008e-29	2.50273e-28	684.946	615.706	641.192	1160.99	1143.87	1188.27
1128	CACNB1	652.864	1.04799	0.0929303	11.2771	1.70178e-29	2.51781e-28	414.729	411.791	450.595	834.397	980.32	825.349
1129	INO80E	2221.41	0.696074	0.0617495	11.2725	1.79307e-29	2.65054e-28	1710.39	1576.88	1800.31	2752.12	2785.39	2703.36
1130	TIA1	1084.78	-0.867725	0.0770624	-11.26	2.06686e-29	3.05255e-28	1481.74	1445.23	1277.2	803.531	742.969	758.034
1131	TMEM245	4922.17	-0.57492	0.0510827	-11.2547	2.19567e-29	3.23993e-28	5955.67	6089.75	5624.67	3890.2	3958.18	4014.55
1132	PRDM11	383.327	-1.19105	0.105881	-11.2489	2.3456e-29	3.45811e-28	558.251	535.526	505.495	248.925	227.378	224.386
1133	PSME3	8222.61	0.555083	0.0493537	11.247	2.39511e-29	3.52797e-28	6641.6	6466.9	6871.83	9644.36	10191.1	9519.81
1134	FAM111A	238.693	-1.57012	0.139611	-11.2464	2.41229e-29	3.55015e-28	341.483	385.064	344.938	104.549	113.689	142.436
1135	TLE2	681.265	-1.03477	0.0920299	-11.2438	2.48413e-29	3.65265e-28	920.52	870.106	956.09	454.04	494.648	392.187
1136	LEPR	638.092	-1.14458	0.101831	-11.24	2.59397e-29	3.8108e-28	876.969	976.023	783.103	412.22	348.049	432.186
1137	NUP88	1664.73	0.729828	0.0649656	11.2341	2.77417e-29	4.07195e-28	1224.39	1314.56	1218.16	2079.02	1979.59	2172.64
1138	EIF4A3	3770.4	0.583006	0.051922	11.2285	2.95485e-29	4.33335e-28	3118.88	2999.34	2937.67	4459.74	4650.29	4456.5
1139	MRPL24	1675.5	0.717713	0.0639883	11.2163	3.39103e-29	4.96865e-28	1276.85	1190.83	1334.18	2128.81	2040.42	2081.91
1140	ALDH18A1	7399.06	0.582173	0.0519468	11.2071	3.76281e-29	5.50855e-28	5927.95	5625.5	6225.46	9009.1	9012.37	8593.97
1141	FAM120AOS	3182.74	0.589495	0.0526237	11.2021	3.98302e-29	5.82583e-28	2523.02	2529.15	2572.02	3858.34	3921.28	3692.61
1142	TPM3	10626	0.525154	0.0469572	11.1837	4.90265e-29	7.16465e-28	8473.73	8688.19	8977.72	12308.9	12945.6	12361.7
1143	SENP3	4212.07	0.622267	0.0556503	11.1817	5.00947e-29	7.31435e-28	3392.07	3104.27	3456.63	5051.19	5256.63	5011.61
1144	ME2	1479.31	0.803237	0.0719056	11.1707	5.67303e-29	8.27598e-28	1087.8	1135.39	1009.95	1769.36	1851.94	2021.42
1145	GNG12	2212.92	0.754216	0.0675229	11.1698	5.73225e-29	8.35507e-28	1722.26	1727.34	1491.62	2791.95	2650.75	2893.6
1146	FZD8	1645.01	0.72932	0.065302	11.1684	5.82112e-29	8.4772e-28	1165.99	1307.63	1239.91	1990.41	2125.19	2040.93
1147	GNL2	1479.07	0.860995	0.0771111	11.1656	6.0058e-29	8.73852e-28	1081.86	1110.65	958.162	1944.6	1737.25	2041.91
1148	PHLDB1	1187.25	-0.804771	0.0720774	-11.1654	6.02346e-29	8.75658e-28	1527.27	1427.41	1575.53	908.079	869.623	815.593
1149	MRPS12	1003.59	0.822029	0.0736459	11.1619	6.2625e-29	9.09615e-28	738.396	701.826	735.454	1207.79	1305.43	1332.66
1150	CDC37	6864.27	0.679068	0.0608407	11.1614	6.2979e-29	9.13962e-28	5041.08	4968.21	5825.62	8421.64	8644.37	8284.71
1151	ZNF302	438.327	-1.1762	0.105414	-11.1579	6.55112e-29	9.49883e-28	622.588	646.393	554.18	256.891	254.305	295.604
1152	PSMD11	4083.39	0.579404	0.0519339	11.1566	6.65094e-29	9.63521e-28	3301	3160.69	3361.34	5010.37	4927.53	4739.42
1153	HOXC6	736.658	-0.917272	0.0822242	-11.1557	6.71334e-29	9.71717e-28	932.398	992.851	964.377	544.648	508.61	477.064
1154	H1FX	15719	0.579737	0.0519723	11.1547	6.78961e-29	9.81905e-28	13087.2	11797.4	12923.3	19005.9	19323.2	18177.2
1155	ECHS1	4772.98	0.672063	0.0602663	11.1516	7.03569e-29	1.01661e-27	3557.36	3499.23	3986.99	5761.12	6158.17	5675.01
1156	RSRP1	307.104	-1.30697	0.117229	-11.1488	7.25391e-29	1.04724e-27	444.423	428.619	439.201	160.308	194.468	175.606
1157	HMCN1	331.504	-1.43959	0.129179	-11.1441	7.64798e-29	1.10317e-27	516.679	533.546	402.946	170.265	167.542	198.045
1158	ZFX	1766.81	-0.746076	0.0669622	-11.1417	7.85727e-29	1.13238e-27	2147.88	2394.52	2098.63	1309.35	1291.47	1359
1159	WDR18	2506.78	0.727543	0.0653476	11.1334	8.62564e-29	1.24205e-27	1868.75	1768.92	2026.12	3171.31	3269.06	2936.53
1160	TTN	763.062	-0.992942	0.0891899	-11.1329	8.67742e-29	1.24843e-27	1014.55	1111.64	920.871	534.691	473.705	522.916
1161	MRC2	3710.22	-0.570435	0.0512552	-11.1293	9.03258e-29	1.2984e-27	4473.93	4292.13	4537.03	3035.89	2985.84	2936.53
1162	NTN3	165.501	-1.83084	0.164567	-11.1252	9.45819e-29	1.35841e-27	254.38	254.4	266.214	81.6475	79.7819	56.5842
1163	SEMA3B	307.178	-1.31777	0.118584	-11.1125	1.09098e-28	1.56555e-27	411.76	438.517	465.097	186.196	181.504	159.997
1164	PEAK1	1366.62	-0.892603	0.0803835	-11.1043	1.1954e-28	1.71392e-27	1779.67	1951.06	1598.32	926.002	911.509	1033.15
1165	COL13A1	346.038	1.25175	0.112876	11.0896	1.40954e-28	2.01921e-27	180.145	223.713	210.278	477.936	483.678	500.478
1166	S100A11	4535.04	0.641396	0.0578398	11.0892	1.41594e-28	2.02663e-27	3389.1	3464.58	3776.71	5296.13	5790.17	5493.55
1167	MAGEE1	349.469	-1.31304	0.118434	-11.0866	1.45697e-28	2.08358e-27	546.373	450.396	498.244	225.028	188.485	188.289
1168	VCAN	2657.74	-0.816981	0.0737145	-11.083	1.51623e-28	2.16647e-27	3431.66	3675.43	3065.08	1960.53	1758.19	2055.57
1169	RASSF4	387.065	-1.17887	0.106449	-11.0745	1.66845e-28	2.38193e-27	511.73	530.576	568.682	220.05	253.308	238.044
1170	ACSF2	970.385	-1.08449	0.0979313	-11.074	1.67768e-28	2.39306e-27	1222.41	1224.48	1510.27	572.528	581.411	711.205
1171	FOXC2	362.799	1.20285	0.108691	11.0667	1.82017e-28	2.59409e-27	232.605	200.946	225.815	511.79	484.675	520.965
1172	CHTOP	2499.52	0.599433	0.0541684	11.0661	1.83178e-28	2.6084e-27	2018.22	1938.19	2006.44	3017.97	3043.68	2972.62
1173	DNAJC2	623.626	0.985355	0.0890485	11.0654	1.84696e-28	2.62779e-27	434.525	435.548	385.336	798.552	808.789	879.007
1174	DOT1L	4679.78	0.592292	0.0535489	11.0608	1.94399e-28	2.76348e-27	3740.48	3592.28	3864.76	5772.08	5744.3	5364.77
1175	AHNAK	26097.8	-0.635131	0.0574274	-11.0597	1.96734e-28	2.79429e-27	32207.3	33245.2	29801.4	21795.9	19132.7	20404.5
1176	NBPF1	2641.43	0.605346	0.0547533	11.0559	2.05292e-28	2.91337e-27	2039.99	2171.8	2073.77	3211.14	3221.2	3130.67
1177	PPP1R35	832.285	0.841803	0.0761673	11.052	2.14328e-28	3.03901e-27	578.047	586.01	624.618	1057.43	1092.02	1055.59
1178	FOXQ1	245.643	1.42969	0.12945	11.0443	2.33458e-28	3.30745e-27	130.654	131.654	136.732	345.508	383.951	345.359
1179	TNFRSF10D	425.711	-1.19297	0.108065	-11.0393	2.46994e-28	3.49625e-27	548.353	576.111	652.586	262.865	279.237	235.117
1180	RAE1	3478.19	0.771731	0.0699489	11.0328	2.65526e-28	3.75539e-27	2443.83	2405.41	2859.98	4274.54	4698.16	4187.23
1181	SF3B2	22467.2	0.59861	0.0542578	11.0327	2.65756e-28	3.75546e-27	17766	17059.6	18790.3	27718.3	28126.1	25342.9
1182	IGSF8	1684.71	0.750078	0.0680316	11.0254	2.88097e-28	4.06772e-27	1252.11	1175.98	1341.43	2163.66	2179.04	1996.06
1183	UBASH3B	606.442	0.944495	0.0857007	11.0209	3.03161e-28	4.27681e-27	425.617	424.659	393.623	812.492	800.811	781.448
1184	TCF3	6580.37	0.516487	0.0469015	11.0122	3.33854e-28	4.70583e-27	5463.73	5310.71	5470.33	7647.98	7965.23	7624.24
1185	SSC4D	145.685	-1.94573	0.176822	-11.0039	3.66027e-28	5.15495e-27	248.441	197.976	247.568	62.7292	59.8364	57.5598
1186	POGZ	3254.7	-0.608281	0.0552801	-11.0036	3.67086e-28	5.16551e-27	4027.52	3998.13	3766.35	2670.47	2578.95	2486.78
1187	ORC5	815.021	0.840217	0.0763787	11.0007	3.79327e-28	5.33327e-27	583.986	605.807	562.467	1063.41	1048.14	1026.32
1188	PTMS	29227.5	-0.661611	0.0601619	-10.9972	3.9426e-28	5.53855e-27	33677.2	34213.3	39552.9	22323.6	23511.7	22086.4
1189	SZT2	2309.72	-0.692536	0.0630088	-10.9911	4.21788e-28	5.92029e-27	2937.75	2684.56	2938.71	1856.98	1768.17	1672.16
1190	PSMD13	3478.26	0.588854	0.0536368	10.9785	4.84647e-28	6.79687e-27	2752.65	2673.67	2908.67	4192.9	4100.79	4240.89
1191	KDSR	1756.35	0.650456	0.0592783	10.9729	5.15831e-28	7.22813e-27	1368.9	1374.95	1356.96	2197.51	2148.13	2091.67
1192	PLXNA2	2192.29	0.664766	0.0605832	10.9728	5.16516e-28	7.23166e-27	1684.65	1738.23	1664.61	2758.09	2780.4	2527.75
1193	POLD2	6234.77	0.66696	0.060795	10.9706	5.28951e-28	7.39955e-27	4840.15	4418.83	5197.9	7846.12	7788.71	7316.93
1194	CDH13	338.532	1.27657	0.11643	10.9643	5.67181e-28	7.92771e-27	204.89	168.28	220.636	473.954	472.708	490.722
1195	C5orf24	1691.72	-0.765784	0.0698615	-10.9615	5.85492e-28	8.1768e-27	2146.89	2272.77	1971.22	1202.81	1327.37	1229.24
1196	SLC12A5	231.959	-1.45926	0.133155	-10.9591	6.0069e-28	8.38203e-27	331.585	330.62	358.404	117.493	134.632	119.022
1197	ABCB6	872.478	0.979361	0.0893879	10.9563	6.19811e-28	8.64162e-27	625.558	514.738	621.51	1184.88	1230.64	1057.54
1198	CCNY	2533.62	0.589987	0.0538736	10.9513	6.54931e-28	9.12366e-27	2038.01	1968.87	2061.34	3048.84	3047.67	3037.01
1199	PER2	306.767	1.37077	0.125183	10.9501	6.63394e-28	9.23385e-27	160.349	188.077	164.7	413.216	499.634	414.626
1200	BRK1	1515.11	-0.767968	0.070159	-10.9461	6.93648e-28	9.64691e-27	1845.99	1840.19	2041.66	1050.46	1129.91	1182.42
1201	SREBF2	7633.54	-0.55046	0.050293	-10.9451	7.01609e-28	9.74951e-27	9099.29	8766.39	9351.66	6450.15	6163.15	5970.61
1202	RAN	11401.1	0.521393	0.0476584	10.9402	7.40256e-28	1.0278e-26	9298.24	8980.2	9811.58	13494.7	13379.4	13442.7
1203	ASH1L	1964.7	-0.899548	0.0822582	-10.9357	7.78336e-28	1.07977e-26	2598.24	2851.85	2223.97	1390	1269.53	1454.61
1204	LIN28B	956.965	0.944721	0.0864193	10.9318	8.12027e-28	1.12557e-26	616.649	746.371	599.758	1206.79	1237.62	1334.61
1205	PDCD11	5322.47	0.613144	0.056105	10.9285	8.42191e-28	1.16642e-26	4115.62	4134.73	4374.4	6776.74	6501.23	6032.07
1206	ITGA6	1563.36	0.822125	0.0752441	10.9261	8.64841e-28	1.19679e-26	1187.77	1174	1026.53	2017.29	1840.97	2133.62
1207	MTSS2	3273.19	0.634038	0.0580367	10.9248	8.77431e-28	1.21321e-26	2635.85	2405.41	2654.89	4135.15	3956.19	3851.63
1208	ZNF473	1126.59	0.758574	0.069466	10.9201	9.2428e-28	1.27693e-26	864.101	830.51	816.25	1467.66	1417.13	1363.88
1209	DIMT1	1159.92	0.798892	0.0732735	10.9029	1.11659e-27	1.54134e-26	818.57	920.59	800.713	1448.74	1445.05	1525.82
1210	LURAP1L	113.667	2.17529	0.199537	10.9017	1.13124e-27	1.56027e-26	41.5719	39.5953	42.4699	204.119	184.496	169.753
1211	THBS3	361.612	-1.16832	0.10719	-10.8996	1.15823e-27	1.59618e-26	508.761	482.072	510.674	226.024	233.362	208.776
1212	SUFU	2309.83	-0.68157	0.0625349	-10.899	1.16489e-27	1.60403e-26	2889.25	2703.37	2943.89	1792.26	1863.91	1666.31
1213	PSMD2	11285.9	0.58655	0.053831	10.8961	1.20246e-27	1.6544e-26	8788.49	8613.95	9666.56	13580.4	13955.9	13110
1214	PPP6R1	7403.69	0.557929	0.0512055	10.8959	1.20582e-27	1.65766e-26	6134.82	5764.08	6070.09	9083.78	8973.47	8395.93
1215	SULT1A1	1936.91	-0.706104	0.0648068	-10.8955	1.21067e-27	1.66296e-26	2348.81	2290.59	2565.8	1491.56	1518.85	1405.83
1216	ETS1	580.372	0.952663	0.0874483	10.894	1.23102e-27	1.68951e-26	401.861	396.942	387.408	783.617	729.007	783.399
1217	PPT1	4799.09	0.545725	0.0501003	10.8927	1.24949e-27	1.71345e-26	3857.28	3821.93	4027.39	5740.22	5817.1	5530.62
1218	MEX3B	588.555	-0.998532	0.0917669	-10.8812	1.41713e-27	1.94174e-26	771.059	834.47	747.884	405.25	359.019	413.65
1219	CDKN1B	1011.31	-0.804071	0.0739223	-10.8772	1.47972e-27	2.02585e-26	1308.52	1332.38	1217.12	700.973	744.964	763.887
1220	ZBTB4	2565.96	-0.670907	0.061685	-10.8763	1.49453e-27	2.04445e-26	3211.92	3081.5	3162.45	2078.03	2041.42	1820.45
1221	IDS	5753	0.537416	0.0494169	10.8752	1.5139e-27	2.06925e-26	4657.04	4897.93	4525.63	6748.86	6822.35	6866.2
1222	HNRNPL	11770.5	0.540482	0.0497125	10.8721	1.56476e-27	2.13701e-26	9655.56	9133.64	9984.56	13992.6	14334.8	13521.7
1223	SLC52A2	1249.03	0.76931	0.07078	10.869	1.61898e-27	2.20925e-26	937.347	857.237	976.807	1607.06	1600.62	1515.09
1224	VANGL2	2081.17	-0.614508	0.0565576	-10.8652	1.68911e-27	2.30306e-26	2554.69	2457.88	2540.94	1667.8	1635.53	1630.21
1225	PSMD14	1110.78	0.75627	0.0696918	10.8516	1.95891e-27	2.66875e-26	811.641	845.359	821.43	1415.89	1332.36	1438.02
1226	OLFM2	993.504	0.79541	0.0733257	10.8476	2.04657e-27	2.78591e-26	715.63	713.704	749.956	1201.81	1322.39	1257.54
1227	PIH1D1	2759.01	0.663287	0.0611536	10.8462	2.07795e-27	2.82632e-26	2039.99	2057.96	2309.95	3473	3370.79	3302.37
1228	SYNGR2	5637.83	0.563814	0.0519954	10.8435	2.14033e-27	2.90879e-26	4623.39	4314.89	4712.08	6678.17	6918.09	6580.36
1229	SBK1	512.752	-0.986352	0.0909995	-10.8391	2.24684e-27	3.05105e-26	695.834	669.16	679.518	332.564	356.027	343.408
1230	MAPK12	1556.68	0.787926	0.0727296	10.8336	2.38513e-27	3.23621e-26	1112.54	1058.18	1255.45	1978.46	2061.37	1874.11
1231	RAB13	1281	-0.725715	0.0670025	-10.8312	2.45028e-27	3.32191e-26	1584.68	1531.35	1673.93	976.782	954.391	964.859
1232	CCT8	6133.56	0.6235	0.0575662	10.831	2.45444e-27	3.32486e-26	4844.11	4989.99	4650.97	7436.89	6940.03	7939.35
1233	UCHL5	997.53	0.792401	0.0732359	10.8198	2.77251e-27	3.75267e-26	699.793	743.401	747.884	1248.61	1219.67	1325.83
1234	RADX	1732.36	-0.840682	0.0777296	-10.8155	2.90799e-27	3.93286e-26	2234.98	2377.7	2057.2	1231.68	1119.94	1372.66
1235	ELOVL1	2667.23	0.651833	0.0603176	10.8067	3.20037e-27	4.32478e-26	2059.79	1941.16	2223.97	3211.14	3303.97	3263.35
1236	MRPS18B	1304.52	0.734331	0.0679953	10.7997	3.4522e-27	4.6613e-26	919.53	993.841	1025.49	1675.76	1609.6	1602.89
1237	C2CD2L	911.741	0.87111	0.080661	10.7996	3.45553e-27	4.66204e-26	628.527	588.979	716.809	1181.9	1172.79	1181.44
1238	MYLIP	447.497	-1.052	0.0974211	-10.7985	3.49814e-27	4.7157e-26	621.598	614.716	574.897	284.77	302.174	286.824
1239	TMED2	8765.06	0.496115	0.0459675	10.7927	3.72552e-27	5.01817e-26	7178.08	7421.14	7218.84	10107.4	10095.4	10569.5
1240	SLC25A38	1232.26	0.728422	0.0675419	10.7847	4.06352e-27	5.46903e-26	913.591	893.863	975.771	1535.37	1565.72	1509.24
1241	PLOD3	2620.91	0.64021	0.0593822	10.7812	4.22395e-27	5.68038e-26	2027.12	1964.91	2154.57	3246.98	3288.01	3043.84
1242	CSNK2A1	6781.46	0.501187	0.0464954	10.7793	4.3127e-27	5.79505e-26	5638.93	5717.55	5488.97	7876.99	7842.56	8123.74
1243	QARS	6377.96	-0.615027	0.0570716	-10.7764	4.44964e-27	5.97426e-26	7695.75	7266.72	8189.44	4982.49	5290.54	4842.83
1244	ITFG2	930.618	0.803329	0.0745617	10.774	4.56614e-27	6.12575e-26	665.15	678.069	690.912	1138.09	1248.59	1162.9
1245	MRPS35	1427.81	0.682742	0.0634063	10.7677	4.88927e-27	6.55397e-26	1122.44	1096.79	1069	1722.56	1751.21	1804.84
1246	LOC389831	745.792	-0.862397	0.0801003	-10.7665	4.95723e-27	6.63974e-26	961.102	929.499	996.488	503.825	536.533	547.306
1247	ACSL5	76.2978	2.89476	0.268872	10.7663	4.96599e-27	6.64615e-26	12.8675	22.7673	18.6453	136.411	124.659	142.436
1248	DBNDD2	2226.82	0.652083	0.0605738	10.7651	5.03125e-27	6.72808e-26	1704.45	1644.19	1847.96	2672.46	2748.49	2743.36
1249	INTS3	3044.35	-0.666796	0.0619923	-10.7561	5.54659e-27	7.41129e-26	3812.73	3496.26	3897.91	2484.27	2350.58	2224.35
1250	EMSY	1226.45	-0.746742	0.0694275	-10.7557	5.57055e-27	7.43735e-26	1564.88	1597.67	1448.12	916.045	889.568	942.42
1251	C19orf24	881.488	0.920839	0.085648	10.7514	5.83425e-27	7.77862e-26	567.159	610.757	650.514	1039.51	1236.62	1184.37
1252	DLG5	3639.64	-0.558223	0.0519209	-10.7514	5.83548e-27	7.77862e-26	4351.19	4410.91	4242.84	2979.14	3015.76	2837.99
1253	DHRS13	1092.19	0.757366	0.0704577	10.7492	5.97652e-27	7.96027e-26	792.835	825.561	817.286	1396.97	1416.13	1304.36
1254	MXD4	3637.18	-0.669652	0.0623495	-10.7403	6.58266e-27	8.76061e-26	4412.56	4261.44	4725.55	2751.12	3022.74	2649.7
1255	MRPS5	1835.91	0.66665	0.062087	10.7373	6.7969e-27	9.03852e-26	1340.2	1437.31	1480.23	2232.36	2315.67	2209.71
1256	FASN	27788.7	0.488013	0.0454541	10.7364	6.86789e-27	9.12565e-26	23580.2	22434.7	23384.3	32999.5	33083.6	31250.1
1257	STRBP	1018.19	0.790451	0.0736436	10.7335	7.08893e-27	9.41186e-26	738.396	794.875	704.378	1313.33	1309.42	1248.76
1258	CHD8	3818.39	-0.668611	0.0622995	-10.7322	7.18598e-27	9.53313e-26	4845.1	4853.39	4364.04	3160.35	2815.3	2872.14
1259	ALOXE3	160.598	1.77301	0.165212	10.7318	7.2201e-27	9.57079e-26	76.2151	66.3221	75.6171	235.981	278.239	231.215
1260	PTPN14	2189.89	-0.744461	0.0693719	-10.7315	7.2447e-27	9.59578e-26	2801.15	2930.05	2496.4	1732.52	1560.73	1618.5
1261	AMOTL1	7366.45	-0.552355	0.0514798	-10.7296	7.39479e-27	9.7868e-26	8936.96	9029.7	8311.67	6191.27	5857.99	5871.1
1262	CASP4	220.619	1.53251	0.142903	10.7241	7.84067e-27	1.03687e-25	116.797	128.685	94.2624	324.598	308.158	351.212
1263	CUX1	5285.39	-0.535313	0.0499261	-10.7221	8.01528e-27	1.05912e-25	6161.55	6412.45	6190.24	4432.86	4366.07	4149.19
1264	DOHH	473.92	1.04467	0.0974535	10.7197	8.22954e-27	1.08657e-25	298.922	289.045	340.795	647.206	640.25	627.305
1265	SECTM1	241.147	-1.40813	0.131377	-10.7183	8.35402e-27	1.10214e-25	352.371	326.661	371.87	137.407	136.627	121.949
1266	CRLS1	1188.09	0.759061	0.0708738	10.71	9.13288e-27	1.20394e-25	852.223	876.045	919.835	1416.88	1490.92	1572.65
1267	FPGS	1994.44	0.811466	0.0757689	10.7097	9.16131e-27	1.20673e-25	1336.24	1383.85	1624.21	2562.93	2690.65	2368.73
1268	POLR2E	8331.38	0.589526	0.0551026	10.6987	1.03223e-26	1.35858e-25	6771.27	6220.41	6966.1	10339.4	10131.3	9559.81
1269	NSMF	13558	0.571197	0.0534399	10.6886	1.15117e-26	1.51393e-25	11008.6	10216.6	11501.1	16110.4	16815	15696.3
1270	POLE	7626.55	-0.540545	0.0505798	-10.687	1.17134e-26	1.53925e-25	9079.49	8843.6	9193.17	6329.67	6437.4	5875.98
1271	NUP93	2857.47	0.588343	0.0550799	10.6816	1.24088e-26	1.62935e-25	2313.18	2173.78	2361.74	3394.34	3475.5	3426.27
1272	IL11RA	258.399	-1.40101	0.131167	-10.6811	1.2473e-26	1.63649e-25	363.259	359.327	401.91	153.338	151.586	120.973
1273	CSAD	311.045	-1.22504	0.114766	-10.6742	1.34408e-26	1.7612e-25	426.607	447.426	432.986	181.218	201.449	176.582
1274	GNPNAT1	1429.97	0.742204	0.0695326	10.6742	1.34446e-26	1.7612e-25	1055.13	1162.12	992.345	1803.21	1762.18	1804.84
1275	PEX26	1939.1	0.630197	0.0590512	10.672	1.37587e-26	1.80094e-25	1529.25	1541.25	1495.77	2369.77	2429.36	2269.22
1276	PYCR2	2983.45	0.632827	0.0593256	10.667	1.45218e-26	1.89933e-25	2263.69	2235.15	2520.22	3700.02	3559.27	3622.37
1277	ERAP2	859.928	-0.934103	0.0875713	-10.6668	1.45604e-26	1.90289e-25	1097.7	1253.19	1035.85	626.296	548.501	598.037
1278	RAB32	1196.73	0.718536	0.0674098	10.6592	1.57934e-26	2.06241e-25	882.907	885.944	945.732	1497.53	1460.01	1508.26
1279	RGL4	344.017	-1.15692	0.108548	-10.6581	1.59765e-26	2.08469e-25	496.883	469.204	458.882	212.084	212.419	214.63
1280	GTPBP1	5530.62	0.58905	0.0552816	10.6554	1.64478e-26	2.14451e-25	4582.8	4167.4	4500.77	6859.38	6750.55	6322.8
1281	TACC2	2095.84	0.658586	0.0618214	10.653	1.68756e-26	2.19857e-25	1591.61	1641.22	1643.9	2662.5	2638.79	2397.03
1282	MTAP	1428.83	0.668048	0.062714	10.6523	1.70116e-26	2.21456e-25	1075.92	1135.39	1100.07	1747.45	1752.21	1761.92
1283	GABRE	815.463	-0.846111	0.0794717	-10.6467	1.80659e-26	2.34998e-25	1060.08	986.912	1096.97	580.494	608.337	559.989
1284	SCYL1	6838.44	0.607004	0.0570251	10.6445	1.84952e-26	2.40394e-25	5266.76	5188.96	5806.98	8308.13	8599.49	7860.33
1285	BRWD3	1073.86	-0.925128	0.0869126	-10.6443	1.85285e-26	2.4064e-25	1415.42	1568.96	1235.77	777.642	696.097	749.253
1286	ZMPSTE24	1645.49	0.678648	0.0637951	10.6379	1.98492e-26	2.57591e-25	1198.66	1344.26	1253.38	2010.32	2022.47	2043.86
1287	BRMS1	2263.78	0.728434	0.0685592	10.6249	2.28253e-26	2.95984e-25	1723.25	1528.38	1861.42	2841.73	2859.18	2768.73
1288	EVA1A	238.674	1.44731	0.136242	10.6231	2.32816e-26	3.01666e-25	106.899	133.634	143.983	354.469	332.092	360.968
1289	SLC25A39	9383.57	0.545165	0.0513228	10.6223	2.34753e-26	3.0394e-25	7574	7324.13	7996.77	10896	11612.3	10898.3
1290	TMED3	2730.02	0.728185	0.0685546	10.622	2.3554e-26	3.04723e-25	1948.93	1919.38	2298.55	3347.55	3523.37	3342.37
1291	NOXA1	505.198	-1.05352	0.0992423	-10.6156	2.52078e-26	3.25865e-25	705.732	608.777	731.311	316.633	335.084	333.652
1292	RPIA	894.491	0.79872	0.0752518	10.614	2.56606e-26	3.31463e-25	642.384	639.463	677.446	1089.3	1182.77	1135.59
1293	IMPDH1	2473.03	0.713195	0.0672085	10.6117	2.62985e-26	3.3944e-25	1917.26	1701.61	2003.34	3129.49	3177.32	2909.21
1294	FAM136A	2837.49	0.568378	0.0535839	10.6073	2.75695e-26	3.5557e-25	2296.35	2228.22	2332.74	3301.74	3441.59	3424.32
1295	FREM2	704.603	-1.00599	0.0948422	-10.607	2.76379e-26	3.56176e-25	985.847	1010.67	825.573	490.88	427.831	486.82
1296	C19orf25	1376.7	0.841038	0.0793054	10.6051	2.82311e-26	3.6354e-25	1034.35	851.298	1074.18	1728.54	1760.19	1811.67
1297	ERAL1	2728.27	0.67495	0.0636746	10.6	2.97984e-26	3.83427e-25	2047.91	1964.91	2292.34	3344.56	3456.55	3263.35
1298	LRFN4	2802.16	0.666803	0.0629262	10.5966	3.09062e-26	3.97376e-25	2153.82	2080.73	2263.33	3364.47	3700.88	3249.69
1299	FAM216A	643.03	0.877423	0.0828097	10.5957	3.12165e-26	4.01056e-25	463.229	458.315	438.165	825.436	847.683	825.349
1300	NCAM1	1964.34	-0.672708	0.0634905	-10.5954	3.13e-26	4.01819e-25	2412.16	2519.25	2310.98	1573.21	1424.11	1546.31
1301	PLEKHG2	2717.53	-0.557361	0.0526082	-10.5946	3.15807e-26	4.05112e-25	3213.9	3272.55	3221.5	2230.37	2202.98	2163.86
1302	NONO	25761.3	-0.503286	0.0475121	-10.5928	3.21832e-26	4.12523e-25	30387.1	29059	31183.2	21597.7	21864.2	20476.7
1303	GDF11	3507.22	-0.550032	0.051956	-10.5865	3.44291e-26	4.40973e-25	4153.23	4147.6	4202.45	2929.35	2876.14	2734.58
1304	IGFBP7	2228.7	-0.658473	0.062212	-10.5843	3.52281e-26	4.5086e-25	2693.26	2584.58	2908.67	1673.77	1739.25	1772.65
1305	C14orf132	1780.15	-0.639101	0.0604329	-10.5754	3.87595e-26	4.95676e-25	2175.59	2239.11	2089.31	1418.87	1391.2	1366.8
1306	NR3C2	470.875	-1.11984	0.105917	-10.5728	3.9846e-26	5.09181e-25	619.619	722.613	592.507	321.611	275.248	293.653
1307	RTN4RL1	499.987	-0.990731	0.0937395	-10.569	4.14989e-26	5.29897e-25	637.435	660.251	698.163	318.624	341.068	344.383
1308	MFSD3	1437.52	0.769727	0.0728536	10.5654	4.31125e-26	5.50079e-25	1065.03	992.851	1131.15	1719.58	1950.67	1765.82
1309	GPR161	1279.14	-0.737505	0.0698248	-10.5622	4.45973e-26	5.6859e-25	1647.04	1559.06	1591.07	1014.62	971.345	891.689
1310	SYNE2	913.235	-1.03118	0.0977063	-10.5539	4.87521e-26	6.21087e-25	1281.8	1355.15	1042.07	591.446	547.503	661.45
1311	IP6K1	2181.01	-0.661519	0.0626888	-10.5524	4.95013e-26	6.3015e-25	2723.95	2538.06	2755.36	1676.76	1787.12	1604.85
1312	TXNDC16	798.747	-0.927631	0.0879163	-10.5513	5.00986e-26	6.37268e-25	1078.89	1121.54	940.552	549.627	513.596	588.281
1313	CCDC85B	1535.22	0.767244	0.0727279	10.5495	5.10606e-26	6.4901e-25	1113.53	1078.97	1217.12	1773.34	2024.47	2003.86
1314	FBXO45	1219.56	0.743156	0.0704537	10.5481	5.18078e-26	6.58007e-25	914.581	968.104	853.541	1480.61	1528.82	1571.68
1315	BATF3	133.278	1.89945	0.180142	10.5442	5.40449e-26	6.85897e-25	51.4699	51.4738	66.2944	205.114	222.392	202.923
1316	ICOSLG	531.835	1.03929	0.0986086	10.5396	5.6755e-26	7.19745e-25	366.228	314.782	363.584	780.629	671.165	694.62
1317	SLC29A2	4151.5	0.627703	0.0595818	10.5352	5.94841e-26	7.53781e-25	3252.5	3082.49	3452.49	4967.55	5339.41	4814.54
1318	SLC5A3	630.601	-1.04281	0.0989932	-10.5341	6.01279e-26	7.61361e-25	865.091	920.59	761.35	453.044	365.002	418.528
1319	DAP3	2827.34	0.565686	0.0537094	10.5323	6.12868e-26	7.75448e-25	2274.58	2211.39	2354.49	3421.23	3367.79	3334.57
1320	NOP16	472.24	1.11161	0.105547	10.5319	6.15626e-26	7.78347e-25	287.044	273.207	336.651	585.472	667.176	683.889
1321	UAP1L1	2544.46	0.613481	0.0582605	10.53	6.28582e-26	7.94127e-25	2007.33	1941.16	2086.2	3074.72	3205.24	2952.14
1322	CTU2	983.01	0.919797	0.0873704	10.5276	6.44873e-26	8.14092e-25	689.895	620.656	729.239	1250.6	1432.09	1175.59
1323	HMGN3	889.575	-0.801179	0.0761126	-10.5262	6.54038e-26	8.25037e-25	1099.68	1102.73	1189.16	619.326	662.19	664.377
1324	CTNNBL1	1744.6	0.672319	0.0638801	10.5247	6.64722e-26	8.37882e-25	1253.1	1361.09	1422.22	2160.67	2125.19	2145.32
1325	KNSTRN	1270.19	0.705883	0.0670984	10.5201	6.97859e-26	8.78986e-25	980.898	980.972	934.337	1643.9	1529.82	1551.19
1326	ARGLU1	1529.4	-0.695496	0.066127	-10.5176	7.1684e-26	9.02213e-25	1771.75	1947.1	1954.65	1136.09	1166.81	1199.98
1327	SNRPC	3994.87	0.570039	0.054211	10.5152	7.35364e-26	9.2483e-25	3210.93	3052.79	3384.12	4738.54	4871.68	4711.13
1328	C1orf43	6384.59	0.502812	0.047823	10.514	7.44458e-26	9.35562e-25	5181.64	5193.91	5474.47	7350.26	7549.36	7557.9
1329	NOP56	6257.23	0.575402	0.0547282	10.5138	7.46137e-26	9.36966e-25	4984.67	4804.88	5288.02	7565.33	7776.74	7123.76
1330	HAUS7	1085.82	0.789668	0.075133	10.5103	7.74743e-26	9.72157e-25	824.509	732.512	830.752	1360.13	1446.05	1320.95
1331	ZNF629	2876.38	-0.664361	0.0632152	-10.5095	7.80985e-26	9.79253e-25	3501.94	3517.05	3562.29	2380.72	2277.77	2018.5
1332	LAMA3	643.681	-0.930425	0.0885429	-10.5082	7.92008e-26	9.92329e-25	827.478	878.025	827.645	405.25	439.798	483.893
1333	KLHDC7A	116.03	-2.10218	0.200485	-10.4855	1.00707e-25	1.26084e-24	203.9	195.007	165.736	50.7807	34.9046	45.8527
1334	SERPINE1	260.228	1.45581	0.138866	10.4835	1.02814e-25	1.28625e-24	108.879	164.32	143.983	404.255	378.964	360.968
1335	CNOT3	5584.17	0.56808	0.0541972	10.4817	1.04811e-25	1.31026e-24	4706.53	4249.56	4540.13	6928.09	6594.97	6485.72
1336	ACCS	454.912	-1.07354	0.102504	-10.4731	1.14787e-25	1.4339e-24	640.405	583.04	626.69	315.637	305.166	258.531
1337	CAPN6	484.837	-0.97576	0.0931726	-10.4726	1.15411e-25	1.44061e-24	621.598	654.312	652.586	336.547	318.13	325.847
1338	LAPTM4B	6510.44	0.500555	0.047799	10.4721	1.16075e-25	1.44781e-24	5295.46	5517.6	5363.63	7417.97	7628.15	7839.84
1339	DHRS3	538.344	1.091	0.104195	10.4707	1.17813e-25	1.46839e-24	321.687	308.843	401.91	738.81	776.877	681.938
1340	PDK1	662.434	0.87887	0.0839767	10.4656	1.24233e-25	1.54726e-24	490.944	456.335	452.667	847.341	831.727	895.592
1341	PODXL	1650.95	0.679496	0.0649304	10.465	1.25069e-25	1.55651e-24	1326.34	1298.72	1181.91	2083.01	1983.58	2032.15
1342	RRP8	863.392	0.843237	0.0806056	10.4613	1.30105e-25	1.61798e-24	616.649	585.02	652.586	1115.18	1176.78	1034.13
1343	BBS1	1682.29	-0.640163	0.0612185	-10.457	1.36088e-25	1.69112e-24	2069.69	1964.91	2114.17	1311.34	1325.38	1308.27
1344	MBOAT7	4390.15	0.562103	0.0537663	10.4546	1.39659e-25	1.7342e-24	3564.29	3391.33	3681.41	5198.55	5436.14	5069.17
1345	CTSL	1268.51	0.745875	0.071351	10.4536	1.41066e-25	1.75037e-24	991.786	885.944	965.413	1651.87	1614.59	1501.43
1346	PAN2	1569.56	-0.670033	0.0641116	-10.451	1.44928e-25	1.79696e-24	1944.97	1874.84	1962.94	1252.59	1238.61	1143.39
1347	ANP32B	5480.1	0.514145	0.0492186	10.4462	1.52563e-25	1.89022e-24	4475.9	4363.4	4702.76	6416.3	6487.27	6434.99
1348	FLII	6050.77	0.576705	0.0552111	10.4454	1.53732e-25	1.90329e-24	4764.93	4663.33	5144.03	7369.18	7472.57	6890.59
1349	GATAD2A	4932.52	0.552554	0.0529063	10.444	1.56102e-25	1.9312e-24	4144.32	3843.71	4009.78	5998.1	5986.64	5612.57
1350	HMOX1	1026.55	0.772666	0.0740127	10.4396	1.63427e-25	2.02032e-24	756.212	720.634	797.605	1242.63	1360.28	1281.93
1351	KLC2	4633.36	0.590957	0.0566346	10.4345	1.72442e-25	2.13018e-24	3869.15	3475.47	3747.71	5743.2	5650.55	5314.04
1352	AGPAT2	7350.01	0.653882	0.0626665	10.4343	1.72857e-25	2.13374e-24	5774.53	5293.89	6069.05	8442.55	9666.58	8853.48
1353	PAX5	63.7858	3.39534	0.325472	10.4321	1.77001e-25	2.18328e-24	4.94903	12.8685	15.5378	130.437	107.706	111.217
1354	ACSS1	651.375	0.918942	0.0881169	10.4287	1.83433e-25	2.26094e-24	445.413	440.497	466.133	903.101	873.612	779.497
1355	B4GALT2	3833.23	0.620537	0.0595101	10.4274	1.85876e-25	2.28937e-24	3079.29	2812.25	3172.81	4744.51	4776.94	4413.57
1356	PCMTD2	1625.83	-0.646698	0.0620259	-10.4262	1.88181e-25	2.31604e-24	1985.55	2032.23	1934.97	1239.65	1243.6	1319
1357	RNF125	425.844	1.07027	0.102675	10.4239	1.92868e-25	2.37197e-24	299.911	270.238	253.783	593.438	590.386	547.306
1358	PRRC2B	30620.3	-0.500849	0.0480632	-10.4206	1.99607e-25	2.45305e-24	36714.9	35720.9	35211.7	26337.3	25737.6	23999.5
1359	IRX4	277.69	1.26528	0.121423	10.4204	2.00102e-25	2.45732e-24	161.338	158.381	169.88	371.396	416.861	388.285
1360	JARID2	3135.49	-0.568222	0.0545339	-10.4196	2.01743e-25	2.47566e-24	3856.29	3764.52	3614.08	2478.3	2617.84	2481.9
1361	MARVELD1	4153.13	-0.519686	0.0498774	-10.4193	2.0248e-25	2.48287e-24	4939.13	4814.78	4925.47	3391.36	3516.39	3331.64
1362	TWNK	861.043	0.818045	0.0785378	10.4159	2.09729e-25	2.56987e-24	606.751	614.716	648.443	1117.18	1152.85	1026.32
1363	SSRP1	22289.5	0.517246	0.0496694	10.4138	2.1452e-25	2.62665e-24	18057	17828.8	19122.8	26852.1	26940.4	24936.1
1364	STOM	1430.54	0.670663	0.0644507	10.4058	2.33207e-25	2.85337e-24	1080.87	1148.26	1082.46	1705.64	1761.19	1804.84
1365	RASGRF1	81.485	2.52617	0.242773	10.4055	2.34003e-25	2.861e-24	23.7554	25.7369	22.7887	132.428	148.594	135.607
1366	IQCN	56.0614	-3.99914	0.384618	-10.3977	2.54003e-25	3.10327e-24	107.889	101.958	106.693	4.9785	9.97274	4.87795
1367	RIOX2	574.27	0.963286	0.0926561	10.3964	2.57572e-25	3.14456e-24	399.882	390.013	378.086	823.445	699.089	755.107
1368	IDH2	4030	-0.568855	0.0547242	-10.395	2.614e-25	3.18896e-24	4859.95	4553.45	5030.09	3331.61	3193.27	3211.64
1369	PCGF3	2063.19	-0.590239	0.0567817	-10.3949	2.61625e-25	3.18937e-24	2441.85	2505.39	2491.22	1603.08	1665.45	1672.16
1370	ANKRD10	746.101	-0.835238	0.0803697	-10.3924	2.68381e-25	3.26936e-24	974.959	906.731	987.166	552.614	517.585	537.55
1371	GCH1	418.729	1.10851	0.106683	10.3907	2.73295e-25	3.32678e-24	247.452	305.873	242.389	571.532	573.433	571.696
1372	RPS27L	1216.27	-0.792064	0.0762415	-10.3889	2.7857e-25	3.38853e-24	1507.48	1493.73	1625.25	801.539	916.495	953.152
1373	SOX8	488.887	1.03447	0.0996138	10.3848	2.90846e-25	3.53528e-24	339.504	312.803	309.719	679.068	698.092	594.134
1374	TUBE1	496.646	0.995703	0.0958855	10.3843	2.92339e-25	3.55083e-24	311.789	332.6	351.153	619.326	680.141	684.864
1375	ENTPD4	1402.38	-0.728891	0.0702379	-10.3775	3.14029e-25	3.81152e-24	1747.01	1867.91	1632.5	1099.25	1046.14	1021.44
1376	NRP2	1041.7	0.733038	0.0706521	10.3753	3.21184e-25	3.89553e-24	806.692	790.915	749.956	1308.35	1265.54	1328.75
1377	KHSRP	27483.3	0.575375	0.0554567	10.3752	3.21487e-25	3.89637e-24	23244.6	20725.1	22253.2	34186.4	33606.1	30884.3
1378	RITA1	1808.05	0.692826	0.0668387	10.3656	3.55373e-25	4.30393e-24	1386.72	1284.87	1475.05	2269.2	2304.7	2127.76
1379	BCL10	585.372	0.884876	0.0854086	10.3605	3.75018e-25	4.53857e-24	408.79	411.791	413.304	746.776	757.928	773.643
1380	MAN2B2	898.09	-0.763332	0.0737065	-10.3564	3.91534e-25	4.735e-24	1153.12	1083.92	1153.94	660.15	667.176	670.231
1381	CASP2	1851.89	-0.72097	0.0696269	-10.3548	3.98203e-25	4.81218e-24	2346.83	2219.31	2349.31	1392.99	1527.82	1275.1
1382	ARMCX3	1430.87	-0.695266	0.0671472	-10.3544	3.99875e-25	4.82889e-24	1728.2	1842.17	1737.12	1100.25	1030.18	1147.29
1383	NOL6	1274.71	0.750279	0.072471	10.3528	4.0638e-25	4.90389e-24	928.438	889.903	1033.78	1619.01	1644.5	1532.65
1384	MKI67	12267.4	-0.657095	0.0634735	-10.3523	4.08603e-25	4.92715e-24	15041.1	16405.3	13594.5	9741.94	9045.28	9776.39
1385	SLC4A8	361.544	-1.15335	0.111423	-10.3511	4.13867e-25	4.98702e-24	545.383	490.981	459.918	236.977	220.398	215.605
1386	SAAL1	1305.39	0.707531	0.0683575	10.3505	4.165e-25	5.01512e-24	990.796	970.084	1014.1	1527.41	1627.55	1702.41
1387	HSF1	3221.14	0.632701	0.0611687	10.3435	4.4771e-25	5.38704e-24	2577.46	2325.23	2675.6	3862.32	4062.89	3823.34
1388	TIMP3	3961.09	0.576283	0.0557198	10.3425	4.5248e-25	5.44052e-24	3161.44	3128.03	3251.54	4713.65	5019.28	4492.59
1389	EDEM1	1828.98	0.625974	0.0605264	10.3422	4.54165e-25	5.45685e-24	1449.08	1464.03	1401.51	2312.02	2155.11	2192.15
1390	FAM193B	763.289	-0.883184	0.0854016	-10.3415	4.57111e-25	5.48829e-24	1048.21	890.893	1030.67	550.623	531.547	527.794
1391	ING4	667.164	-0.891732	0.0862756	-10.3359	4.85059e-25	5.8077e-24	912.602	798.834	889.796	454.04	467.722	479.99
1392	LETMD1	2301.19	-0.572961	0.0554341	-10.3359	4.84829e-25	5.8077e-24	2757.6	2699.41	2799.9	1806.2	1871.88	1872.16
1393	SDHB	2485.43	0.614211	0.0594252	10.3359	4.8499e-25	5.8077e-24	1914.29	1887.7	2091.38	2923.38	3021.74	3074.08
1394	TXNIP	8553.76	0.445772	0.0431287	10.3358	4.85106e-25	5.8077e-24	7225.59	7259.79	7242.67	9814.62	9906.92	9872.97
1395	ATAD3B	768.794	0.852557	0.0825657	10.3258	5.38668e-25	6.44433e-24	529.546	530.576	584.22	978.774	1051.13	938.518
1396	HGH1	357.925	1.20379	0.116614	10.3228	5.55569e-25	6.64175e-24	194.992	205.895	249.64	463.001	533.542	500.478
1397	CA9	68.1894	5.63797	0.546229	10.3216	5.62667e-25	6.7218e-24	0	0.989881	7.25095	142.385	133.635	124.876
1398	MRPS26	2140.96	0.793975	0.0769489	10.3182	5.82993e-25	6.95963e-24	1509.45	1411.57	1778.56	2728.22	2850.21	2567.75
1399	ZNF594	203.986	-1.45852	0.141359	-10.3178	5.85247e-25	6.98155e-24	306.84	312.803	277.608	114.506	110.697	101.461
1400	SHB	1451.32	0.715828	0.0693943	10.3154	6.00489e-25	7.15825e-24	1179.85	1020.57	1094.89	1835.08	1841.97	1735.58
1401	CSRP2	895.708	-0.775717	0.0752144	-10.3134	6.12832e-25	7.30017e-24	1083.84	1134.4	1174.65	665.128	635.264	680.962
1402	PSEN2	740.194	0.865551	0.0839395	10.3116	6.24519e-25	7.4341e-24	556.271	485.042	532.427	957.864	1002.26	907.299
1403	LTBR	3520.54	0.561269	0.054449	10.3082	6.4732e-25	7.70002e-24	2910.03	2741.97	2880.7	4156.06	4375.04	4059.43
1404	NCOA2	494.499	-1.02414	0.0993762	-10.3057	6.64223e-25	7.89545e-24	659.211	720.634	609.08	312.65	317.133	348.286
1405	PMPCA	8077.6	0.623046	0.0604624	10.3047	6.71081e-25	7.9713e-24	6285.27	5990.76	6804.5	9841.51	10389.6	9153.96
1406	DNAJB4	325.12	-1.17189	0.113758	-10.3016	6.93098e-25	8.22696e-24	423.637	485.042	442.308	202.127	204.441	193.167
1407	EXD3	486.118	-1.13682	0.110387	-10.2984	7.1622e-25	8.49538e-24	678.017	577.101	749.956	288.753	335.084	287.799
1408	NFE2L1	11381.4	0.491692	0.0477536	10.2964	7.31259e-25	8.66145e-24	9494.22	9124.73	9762.89	13605.3	13438.3	12863.2
1409	TXNRD1	4009.17	0.535518	0.0520099	10.2965	7.30996e-25	8.66145e-24	3279.23	3405.19	3135.52	4811.23	4694.17	4729.66
1410	TYMSOS	195.532	-1.52368	0.148067	-10.2905	7.77638e-25	9.20425e-24	325.646	270.238	274.5	106.54	97.7329	98.5346
1411	PPP1R16B	214.564	1.47628	0.143464	10.2902	7.80203e-25	9.22807e-24	127.685	107.897	104.621	350.487	297.188	299.506
1412	COPS3	2676.46	0.555771	0.0540283	10.2867	8.09355e-25	9.56609e-24	2204.3	2100.53	2197.04	3202.17	3127.45	3227.25
1413	MAN2B1	4270.47	-0.581471	0.0565544	-10.2816	8.52745e-25	1.00718e-23	5253.89	4789.05	5315.99	3445.12	3516.39	3302.37
1414	IQSEC2	1319.74	-0.712259	0.0693063	-10.277	8.94963e-25	1.0563e-23	1709.4	1519.47	1688.44	1011.63	1000.27	989.249
1415	TP73	1038.37	-0.728188	0.0708899	-10.2721	9.41348e-25	1.11026e-23	1305.55	1242.3	1337.28	803.531	768.898	772.667
1416	GLUL	11988.2	-0.488222	0.0475337	-10.2711	9.51518e-25	1.12146e-23	13998.8	13495.1	14498.8	10138.2	10118.3	9679.81
1417	WIZ	5170.27	0.511019	0.0497808	10.2654	1.00917e-24	1.18857e-23	4256.17	4178.29	4357.82	6055.85	6283.82	5889.64
1418	AMIGO3	155.665	-1.71795	0.167395	-10.2628	1.03607e-24	1.21939e-23	242.503	238.561	235.138	60.7377	88.7574	68.2913
1419	SLX4	1527.22	-0.710346	0.0692259	-10.2613	1.05306e-24	1.23851e-23	1876.67	1807.52	2003.34	1241.64	1124.93	1109.25
1420	PELP1	7452.24	0.599397	0.0584576	10.2535	1.14089e-24	1.34086e-23	6063.55	5640.34	6074.23	9391.45	9280.63	8263.25
1421	CHORDC1	1124.23	0.786374	0.0766957	10.2532	1.14514e-24	1.34491e-23	824.509	876.045	774.816	1339.22	1397.18	1533.63
1422	LGR4	1377.7	-0.821892	0.0801809	-10.2505	1.17764e-24	1.38211e-23	1742.06	1919.38	1618	1041.5	895.552	1049.74
1423	PSPC1	1355.83	-0.662735	0.0646845	-10.2456	1.23792e-24	1.45184e-23	1602.5	1715.46	1667.72	1063.41	1036.17	1049.74
1424	RELT	1468.65	0.725494	0.0708928	10.2337	1.40095e-24	1.64189e-23	1073.94	1027.5	1220.23	1811.18	1843.96	1835.09
1425	APOBEC3C	1536.79	-0.698671	0.068296	-10.23	1.45453e-24	1.70348e-23	1825.2	1823.36	2057.2	1166.96	1199.72	1148.27
1426	CCNK	2964.42	0.606051	0.0592688	10.2255	1.52509e-24	1.78486e-23	2457.69	2240.1	2354.49	3772.71	3442.59	3518.95
1427	GHITM	4299.96	0.56879	0.0556277	10.2249	1.53313e-24	1.79302e-23	3588.05	3416.08	3385.16	5233.4	4832.79	5344.28
1428	CLASP1	1825.78	-0.655912	0.0641769	-10.2204	1.60721e-24	1.87834e-23	2205.29	2357.9	2138	1480.61	1358.29	1414.61
1429	DHX32	1424.49	0.632999	0.0619563	10.2169	1.66647e-24	1.94624e-23	1123.43	1110.65	1116.65	1739.49	1714.31	1742.4
1430	TNRC6A	1391.98	-0.713361	0.0698383	-10.2145	1.70803e-24	1.99338e-23	1668.81	1874.84	1643.9	1059.43	1057.11	1047.78
1431	ZNF580	2177.22	-0.677189	0.0663218	-10.2106	1.77676e-24	2.07214e-23	2711.08	2550.92	2775.04	1611.04	1824.01	1591.19
1432	CCBE1	876.204	-0.772204	0.0756319	-10.21	1.78802e-24	2.08382e-23	1085.82	1146.28	1083.5	630.279	680.141	631.207
1433	ALAS1	1909.05	0.624152	0.0611317	10.21	1.78934e-24	2.0839e-23	1473.82	1452.16	1581.74	2277.17	2389.47	2279.95
1434	EGFL7	3669.41	0.701561	0.0687227	10.2086	1.81505e-24	2.11237e-23	2805.11	2529.15	3049.54	4483.64	4842.76	4306.26
1435	TRPV1	224.895	-1.36096	0.133404	-10.2018	1.94607e-24	2.26328e-23	310.799	321.711	338.723	126.454	133.635	118.046
1436	SYNRG	1609.64	-0.639127	0.0626546	-10.2008	1.96641e-24	2.28534e-23	2000.4	1998.57	1882.14	1222.72	1297.45	1256.56
1437	COL18A1	5487.53	-0.590309	0.057901	-10.1951	2.0843e-24	2.42066e-23	6910.83	6088.76	6784.82	4511.52	4402.97	4226.26
1438	PITPNM1	6337.88	0.51118	0.0501409	10.1949	2.09023e-24	2.42586e-23	5308.33	4973.16	5398.85	7429.92	7593.24	7323.76
1439	PKDCC	541.372	-0.945241	0.0927448	-10.1919	2.15617e-24	2.50065e-23	744.334	660.251	733.382	357.457	387.94	364.871
1440	SPG7	1490.83	-0.709625	0.0696817	-10.1838	2.34188e-24	2.71415e-23	1851.93	1741.2	1957.76	1128.13	1195.73	1070.22
1441	SELENOS	853.33	0.794487	0.0780362	10.181	2.41047e-24	2.7917e-23	613.68	588.979	670.195	1108.21	1051.13	1087.78
1442	AP3D1	14304.3	0.519642	0.0510529	10.1785	2.47346e-24	2.86266e-23	11488.7	11515.3	12263.4	17009.6	17556	15992.9
1443	OBSCN	1166.51	-0.705376	0.0693057	-10.1778	2.49248e-24	2.88268e-23	1507.48	1384.84	1446.05	917.04	864.637	879.007
1444	RIPK4	631.012	0.865411	0.0850315	10.1775	2.49791e-24	2.88696e-23	471.148	440.497	429.878	785.608	827.737	831.203
1445	SERPINF1	593.788	-0.881226	0.0866039	-10.1754	2.55437e-24	2.95016e-23	771.059	736.472	801.748	406.246	421.847	425.357
1446	KLHL22	968.726	-0.841781	0.0827416	-10.1736	2.60109e-24	3.00205e-23	1175.89	1165.09	1390.11	698.982	712.054	670.231
1447	EIF5	4074.94	0.636172	0.0625433	10.1717	2.65205e-24	3.05874e-23	3027.82	3510.12	3034.01	4831.14	4932.52	5114.04
1448	ARHGAP30	208.728	-1.43285	0.14087	-10.1714	2.66051e-24	3.06638e-23	303.871	317.752	292.11	126.454	111.695	100.486
1449	NOP2	2106.7	0.63161	0.0621131	10.1687	2.73516e-24	3.15025e-23	1643.08	1588.76	1726.76	2555.96	2687.65	2438
1450	STRADA	1333.99	-0.674722	0.0663599	-10.1676	2.76595e-24	3.18352e-23	1631.2	1629.34	1660.47	1003.67	1089.02	990.224
1451	POLR3C	1315.53	0.704195	0.0692604	10.1674	2.77318e-24	3.18964e-23	959.122	1018.59	1024.46	1734.51	1590.65	1565.82
1452	NOC3L	818.807	0.853746	0.0840213	10.1611	2.95813e-24	3.40001e-23	550.332	645.403	554.18	1020.59	1029.19	1113.15
1453	FBRSL1	3386.73	0.583591	0.0574347	10.1609	2.96192e-24	3.40203e-23	2719.99	2642.98	2769.86	4028.61	4311.22	3847.73
1454	MRTFB	1342.5	-0.787886	0.0775509	-10.1596	3.00302e-24	3.44687e-23	1733.15	1835.24	1532.02	1014.62	919.487	1020.47
1455	PDLIM1	8314.91	-0.552736	0.0544289	-10.1552	3.14195e-24	3.60384e-23	9580.34	9557.3	10528.4	6637.34	7046.74	6539.38
1456	CRIP2	744.176	-0.855434	0.0842418	-10.1545	3.164e-24	3.62664e-23	957.143	883.964	1034.81	521.747	542.517	524.868
1457	PTGER4	154.325	-1.69214	0.166849	-10.1417	3.60641e-24	4.13091e-23	242.503	211.835	252.748	78.6604	76.7901	63.4134
1458	RHBDD1	877.096	0.790736	0.0780181	10.1353	3.85249e-24	4.40975e-23	650.303	643.423	633.941	1175.92	1032.18	1126.81
1459	MIF	15946.2	0.656759	0.0648217	10.1318	3.99293e-24	4.56738e-23	11680.7	11836	13618.3	18015.2	20552.8	19974.2
1460	HIP1R	1999.3	0.616425	0.0608515	10.13	4.06736e-24	4.64933e-23	1559.94	1538.28	1637.68	2481.29	2476.23	2302.39
1461	CIB1	1994.68	0.662822	0.0654325	10.1299	4.07227e-24	4.65176e-23	1480.75	1497.69	1655.29	2317	2553.02	2464.34
1462	BTBD11	857.26	0.790831	0.0780878	10.1275	4.1735e-24	4.76413e-23	623.578	598.878	661.909	1140.08	1038.16	1080.95
1463	RAB7A	7134.72	0.465818	0.0460304	10.1198	4.51406e-24	5.14936e-23	5912.11	6099.65	5966.5	8135.87	8475.83	8218.37
1464	IRF2BPL	2267.85	0.581284	0.057464	10.1156	4.71002e-24	5.36923e-23	1736.12	1856.03	1859.35	2714.28	2667.71	2773.6
1465	CYBRD1	403.138	-1.02895	0.101747	-10.1128	4.84967e-24	5.52465e-23	572.108	518.698	532.427	268.839	266.272	260.483
1466	CNOT11	2257.56	0.562648	0.055641	10.1121	4.88237e-24	5.55811e-23	1804.42	1820.39	1843.81	2626.66	2755.47	2694.58
1467	PUS1	729.955	0.863022	0.0853529	10.1112	4.92666e-24	5.60471e-23	526.577	470.194	557.288	941.933	981.318	902.421
1468	CLTB	2146	0.715625	0.0708207	10.1047	5.26375e-24	5.98411e-23	1562.9	1529.37	1781.66	2504.19	2846.22	2651.65
1469	SLC25A19	753.472	0.81351	0.0805411	10.1006	5.49283e-24	6.24028e-23	542.414	530.576	566.61	957.864	1009.24	914.128
1470	CCDC150	212.427	-1.48059	0.146647	-10.0963	5.73607e-24	6.51219e-23	283.085	342.499	312.827	93.5959	117.678	124.876
1471	PSMB2	8439.95	0.512371	0.0507494	10.0961	5.74849e-24	6.52186e-23	6878.17	6727.23	7265.46	9765.83	10340.7	9662.25
1472	FBL	10690.9	0.58231	0.0576836	10.0949	5.81936e-24	6.59778e-23	8325.26	8091.29	9270.86	12468.2	13430.3	12559.7
1473	CMTM7	1056.32	0.802703	0.0795211	10.0942	5.85949e-24	6.63877e-23	731.467	740.431	838.003	1279.48	1451.03	1297.54
1474	MTURN	942.271	-0.74215	0.0735837	-10.0858	6.38482e-24	7.22905e-23	1218.45	1198.75	1120.79	720.887	702.081	692.669
1475	ARMC6	1673.54	0.681696	0.0675902	10.0857	6.38953e-24	7.22949e-23	1256.06	1215.57	1384.93	2047.16	2154.11	1983.37
1476	MAVS	8157.72	-0.585811	0.0580942	-10.0838	6.51521e-24	7.36669e-23	9986.16	9476.13	9912.06	6868.34	6751.55	5952.08
1477	CBS	2708.81	0.599258	0.0594283	10.0837	6.52186e-24	7.36922e-23	2146.89	2034.21	2281.98	3206.16	3379.76	3203.84
1478	UBE4B	3800.26	-0.554986	0.0550443	-10.0825	6.60002e-24	7.45248e-23	4423.45	4668.28	4474.87	3140.44	3186.29	2908.23
1479	ATP9A	6023.29	-0.47995	0.0476233	-10.0781	6.90831e-24	7.79532e-23	7116.71	6982.62	6948.49	5167.69	5049.2	4875.02
1480	TSC2	6798.83	-0.523119	0.0519102	-10.0774	6.95545e-24	7.84321e-23	7979.82	7755.72	8318.92	5592.85	5813.11	5332.58
1481	HM13	8324.39	0.551087	0.0546927	10.0761	7.04946e-24	7.94385e-23	6749.49	6354.05	7157.73	9761.85	10305.8	9617.37
1482	DNAH1	191.845	-1.49924	0.148846	-10.0725	7.3131e-24	8.23538e-23	296.942	262.319	291.074	112.514	86.7628	101.461
1483	DESI1	3424.68	0.567075	0.0563104	10.0705	7.45829e-24	8.39321e-23	2796.2	2639.02	2845.48	3991.76	4293.26	3982.36
1484	HIST2H2BE	227.196	-1.33985	0.133064	-10.0692	7.55751e-24	8.49914e-23	325.646	313.792	337.687	124.463	140.616	120.973
1485	N4BP3	455.365	0.997391	0.0990789	10.0666	7.75879e-24	8.71963e-23	282.095	310.823	319.042	638.244	608.337	573.647
1486	USP3	1152.57	0.708394	0.0704549	10.0546	8.77068e-24	9.85019e-23	870.04	880.994	874.258	1461.69	1488.93	1339.49
1487	KCNH3	370.45	-1.06003	0.105434	-10.054	8.82449e-24	9.90396e-23	495.893	478.113	528.284	241.955	243.335	235.117
1488	NPM3	1484.24	0.679271	0.067572	10.0526	8.95203e-24	1.00404e-22	1089.78	1104.71	1229.55	1774.34	1874.88	1832.16
1489	DDX27	2664.64	0.565496	0.056282	10.0476	9.4178e-24	1.05557e-22	2129.07	2104.49	2213.61	3179.27	3299.98	3061.4
1490	HOXD9	440.405	-0.971135	0.0966949	-10.0433	9.83417e-24	1.10149e-22	591.904	586.01	571.79	305.68	302.174	284.872
1491	GPS1	9396	0.586378	0.0583927	10.042	9.96597e-24	1.11551e-22	7563.11	7021.23	7953.26	11178.7	11964.3	10695.4
1492	PI4KA	4845.76	-0.494374	0.0492342	-10.0413	1.00384e-23	1.12286e-22	5700.3	5591.84	5711.68	4147.09	4032.98	3890.65
1493	MEX3C	971.424	0.724635	0.0722123	10.0348	1.07184e-23	1.19813e-22	725.528	766.168	705.414	1236.66	1197.73	1197.05
1494	IQCB1	1641.35	0.624782	0.0622856	10.0309	1.11474e-23	1.24524e-22	1268.93	1340.3	1264.77	2056.12	1930.72	1987.28
1495	HMGCS1	2351.13	-0.641753	0.0639974	-10.0278	1.15067e-23	1.28452e-22	2907.06	3023.1	2666.28	1900.79	1743.24	1866.3
1496	KDM5C	12292.5	0.455484	0.0454364	10.0247	1.1877e-23	1.32496e-22	10460.3	10189.8	10453.8	14611.9	14303.9	13735.3
1497	NGF	90.5013	2.34077	0.233506	10.0245	1.18989e-23	1.32652e-22	23.7554	31.6762	34.1831	135.415	176.518	141.461
1498	RNF138	1003	0.807473	0.0805582	10.0235	1.20213e-23	1.33928e-22	758.192	781.016	648.443	1212.76	1305.43	1312.17
1499	ERGIC1	6850.18	0.452616	0.0451609	10.0223	1.21645e-23	1.35432e-22	5786.41	5697.76	5869.13	7841.14	8014.09	7892.53
1500	TP53	3511.51	-0.594451	0.0593161	-10.0218	1.22306e-23	1.36078e-22	4300.71	4037.73	4336.07	2877.58	2916.03	2600.92
1501	ETFA	3335.02	0.544375	0.0543604	10.0142	1.32052e-23	1.46823e-22	2659.61	2705.35	2775.04	3836.44	3889.37	4144.31
1502	SERBP1	14450.5	0.508856	0.0508177	10.0134	1.33152e-23	1.47947e-22	11682.7	12525	11576.7	16926.9	16304.4	17687.5
1503	ERN1	420.111	1.05905	0.10577	10.0128	1.33922e-23	1.48704e-22	276.156	282.116	258.963	629.283	539.525	534.623
1504	DOCK3	796.166	-0.782118	0.0781176	-10.0121	1.34916e-23	1.49708e-22	978.919	1053.23	988.202	582.485	607.34	566.818
1505	FBXL6	503.125	1.01763	0.101665	10.0096	1.38255e-23	1.53311e-22	295.952	330.62	371.87	667.12	720.032	633.158
1506	GRAMD1A	5905.3	0.539088	0.0538731	10.0066	1.42527e-23	1.57943e-22	4766.91	4649.47	5028.02	6821.55	7372.85	6793.03
1507	AHCYL1	6200.44	0.466809	0.0466528	10.006	1.43409e-23	1.58815e-22	5188.57	5284.98	5144.03	7238.74	7325.98	7020.35
1508	BHLHB9	241.635	-1.27788	0.127716	-10.0056	1.43991e-23	1.59354e-22	338.514	352.398	335.616	135.415	137.624	150.241
1509	TSPAN17	1718.63	0.687836	0.068805	9.99689	1.57257e-23	1.73921e-22	1334.26	1225.47	1390.11	2158.68	2216.94	1986.3
1510	P3H2	651.021	0.834302	0.0834634	9.99601	1.58657e-23	1.7534e-22	453.331	453.366	497.208	838.38	828.735	835.105
1511	PARP1	20246.1	0.468075	0.0468265	9.99595	1.5875e-23	1.7534e-22	16620.8	16717.1	17633.3	23561.3	24222.8	22721.5
1512	GYPC	307.095	1.20555	0.12062	9.99459	1.60952e-23	1.77654e-22	177.175	174.219	206.134	431.138	460.741	393.163
1513	MYO7B	66.408	2.7948	0.279704	9.99199	1.65237e-23	1.82263e-22	19.7961	16.828	13.4661	119.484	116.681	112.193
1514	SLC26A2	1193.51	-0.735594	0.0736305	-9.99034	1.68005e-23	1.85194e-22	1500.55	1571.93	1401.51	897.126	840.702	949.249
1515	TOM1L2	1743.41	-0.618182	0.0618907	-9.98829	1.71521e-23	1.88945e-22	2208.26	2036.19	2089.31	1390.99	1398.18	1337.53
1516	MTRR	1588.94	0.658305	0.0659874	9.97621	1.93727e-23	2.13266e-22	1222.41	1280.91	1194.34	1893.82	1874.88	2067.28
1517	HRAS	1952.24	0.753148	0.0755003	9.97542	1.95278e-23	2.14831e-22	1424.33	1304.66	1633.54	2451.42	2561	2338.49
1518	MT1X	938.476	-0.776385	0.0778419	-9.97386	1.98361e-23	2.18079e-22	1124.42	1158.16	1273.06	659.154	695.1	720.961
1519	METRNL	1210.98	0.679555	0.0681606	9.96991	2.06409e-23	2.26778e-22	927.449	886.934	978.879	1463.68	1491.92	1517.04
1520	TMEM101	1431.23	-0.687493	0.0689875	-9.96548	2.15831e-23	2.36974e-22	1775.71	1640.23	1882.14	1096.27	1116.95	1076.08
1521	FOXRED2	6718.05	-0.529342	0.0531227	-9.9645	2.17969e-23	2.39164e-22	7800.66	7880.45	8129.36	5521.16	5801.14	5175.51
1522	CCNB1IP1	2272.11	0.598586	0.0600738	9.96417	2.18683e-23	2.3979e-22	1771.75	1746.15	1904.93	2624.67	2778.41	2806.77
1523	HOXB3	660.142	-0.825125	0.0828454	-9.95981	2.28492e-23	2.50381e-22	854.203	812.693	864.935	470.966	494.648	463.405
1524	PCDHB11	274.83	-1.25033	0.12555	-9.9588	2.30826e-23	2.52773e-22	411.76	377.145	371.87	179.226	166.545	142.436
1525	ACADVL	6504.56	0.550764	0.0553417	9.95206	2.47006e-23	2.70314e-22	5243.99	4959.31	5630.88	7771.44	7923.34	7498.39
1526	FAM120B	1139.06	-0.693507	0.0696921	-9.95102	2.49613e-23	2.72988e-22	1373.85	1457.11	1392.18	867.255	833.721	910.226
1527	TRIM5	957.966	-0.779415	0.0783675	-9.94564	2.63476e-23	2.8796e-22	1179.85	1292.79	1159.12	654.175	737.983	723.888
1528	MAMLD1	679.156	0.838181	0.0842942	9.94352	2.69156e-23	2.93975e-22	517.669	491.971	451.631	888.165	882.588	842.91
1529	NTHL1	1106.47	0.796328	0.0801002	9.94165	2.74235e-23	2.99327e-22	798.774	728.553	899.118	1411.9	1459.01	1341.44
1530	FRS2	660.334	-0.935297	0.094094	-9.94002	2.78759e-23	3.04066e-22	880.928	936.428	784.139	446.074	417.858	496.575
1531	RTN4RL2	1378.8	0.652574	0.065677	9.93611	2.89919e-23	3.16032e-22	1100.66	1060.16	1055.53	1625.98	1764.18	1666.31
1532	CDC20	7847.43	0.521649	0.0525088	9.93451	2.94611e-23	3.20937e-22	6414.94	6148.15	6769.28	9306.82	9553.89	8891.53
1533	FAM131C	588.235	0.934618	0.0941209	9.92998	3.08319e-23	3.35652e-22	437.494	355.367	419.52	786.604	794.827	735.595
1534	SNN	1145.47	-0.670003	0.0674942	-9.92682	3.18229e-23	3.46214e-22	1435.22	1414.54	1370.43	905.092	865.634	881.934
1535	PRKAG2	806.27	0.772364	0.0778133	9.92586	3.21314e-23	3.49342e-22	608.731	611.747	565.574	986.739	1054.12	1010.71
1536	PCLAF	1283.08	-0.705582	0.0710887	-9.92538	3.22882e-23	3.50819e-22	1481.74	1703.59	1586.92	966.825	960.375	999.004
1537	CAP2	631.634	-0.90135	0.0908149	-9.92513	3.23671e-23	3.51447e-22	778.978	878.025	811.071	469.971	451.765	399.992
1538	COPS7A	2131.06	0.606144	0.0610768	9.92428	3.26444e-23	3.54228e-22	1720.28	1588.76	1760.95	2648.56	2496.18	2571.66
1539	RNASEH1	703.474	0.807391	0.0813557	9.92421	3.2668e-23	3.54254e-22	486.985	519.688	528.284	894.139	923.476	868.275
1540	BRIX1	1582.85	0.737693	0.0743398	9.92325	3.29823e-23	3.57429e-22	1196.68	1181.92	1181.91	1834.08	1891.83	2210.69
1541	MFHAS1	615.084	0.834831	0.0841349	9.92254	3.32203e-23	3.59775e-22	450.362	447.426	427.806	805.522	780.866	778.521
1542	ACD	1295	0.673153	0.0678621	9.91942	3.42756e-23	3.70963e-22	1035.34	945.337	1014.1	1628.97	1615.58	1530.7
1543	SURF4	25824.4	0.477359	0.0481249	9.91917	3.43598e-23	3.71634e-22	20853.2	21098.3	22820.8	30042.3	30599.4	29532.1
1544	ARF6	2099.75	0.624296	0.062984	9.91197	3.69302e-23	3.99177e-22	1721.27	1712.49	1522.7	2592.8	2492.19	2557.02
1545	PLEKHB2	2175.55	0.562792	0.0568017	9.90801	3.84206e-23	4.14956e-22	1737.11	1809.5	1722.62	2602.76	2644.77	2536.53
1546	RAB3B	1875.54	-0.66782	0.0674023	-9.90796	3.84398e-23	4.14956e-22	2326.05	2449.96	2129.71	1514.46	1389.2	1443.87
1547	CCDC59	638.476	1.01855	0.102811	9.90701	3.88092e-23	4.18673e-22	389.984	422.679	453.703	723.874	927.465	913.152
1548	NT5C3A	490.363	0.955476	0.0965056	9.90073	4.13244e-23	4.45519e-22	319.707	369.226	311.791	645.214	658.201	638.036
1549	FAM13B	472.291	-1.02586	0.103684	-9.89414	4.41375e-23	4.75539e-22	688.905	634.514	576.969	290.745	300.179	342.432
1550	METTL26	3285.24	0.665703	0.0673003	9.89154	4.53005e-23	4.87755e-22	2479.47	2348	2794.73	3822.5	4244.4	4022.36
1551	ELL2	899.731	0.872617	0.0882797	9.88469	4.85078e-23	5.21951e-22	627.537	726.573	552.108	1180.9	1170.8	1140.47
1552	NACAD	498.927	-1.11855	0.113164	-9.88437	4.8663e-23	5.23284e-22	719.589	605.807	724.06	346.504	339.073	258.531
1553	XPO6	4630.72	0.48557	0.0491346	9.88245	4.9604e-23	5.3306e-22	3842.43	3811.04	3922.77	5519.17	5446.11	5242.82
1554	FOXO6	683.045	-0.820359	0.0830442	-9.87858	5.15589e-23	5.5371e-22	847.274	870.106	899.118	493.868	521.574	466.332
1555	EML2	1238.52	0.727275	0.0736264	9.87792	5.19012e-23	5.57028e-22	914.581	866.146	1018.24	1608.06	1514.86	1509.24
1556	SPAG5	2194.65	-0.590323	0.0597737	-9.87596	5.29215e-23	5.67614e-22	2502.23	2767.71	2642.46	1753.43	1780.13	1721.92
1557	CDYL	1753.3	0.601051	0.0608906	9.871	5.56088e-23	5.96053e-22	1348.12	1433.35	1398.4	2045.17	2165.08	2129.71
1558	APEH	4152.17	0.560845	0.0568401	9.86705	5.78394e-23	6.19565e-22	3348.52	3170.59	3546.75	4934.69	5137.96	4774.54
1559	DDX52	1744.07	0.590162	0.0598149	9.86649	5.81667e-23	6.22671e-22	1383.75	1395.73	1397.36	2112.88	2025.46	2149.23
1560	MAF1	3246.37	0.604232	0.0612641	9.86274	6.03761e-23	6.45908e-22	2550.73	2417.29	2761.58	3775.7	4100.79	3872.12
1561	ACVR2B	1425.8	-0.679675	0.0689352	-9.85963	6.228e-23	6.65849e-22	1835.1	1768.92	1662.54	1141.07	1028.19	1119
1562	SLC6A16	119.106	-1.8495	0.187586	-9.85947	6.23779e-23	6.66469e-22	194.002	182.138	183.346	47.7936	46.8719	60.4866
1563	KMT2C	1757.6	-0.838124	0.0850723	-9.8519	6.72599e-23	7.1817e-22	2336.93	2470.74	1954.65	1372.08	1145.87	1265.34
1564	GALNT9	66.8039	2.76917	0.281128	9.85021	6.83988e-23	7.29864e-22	19.7961	12.8685	18.6453	115.501	128.648	105.364
1565	SDF4	4996.57	0.507085	0.051484	9.84937	6.8978e-23	7.35575e-22	4094.83	3969.42	4318.46	5876.63	5982.65	5737.45
1566	E2F4	2198.97	0.614342	0.062385	9.8476	7.02009e-23	7.48138e-22	1691.58	1666.96	1855.21	2600.77	2777.41	2601.9
1567	MRPL28	5695.82	0.538532	0.0546951	9.84606	7.1283e-23	7.59184e-22	4594.68	4430.71	4909.93	6680.16	7029.79	6529.63
1568	WDR5	9586.95	0.533823	0.0543244	9.82658	8.65035e-23	9.20699e-22	7826.4	7326.11	8347.92	11423.7	11575.4	11022.2
1569	EP300	4932.4	-0.595276	0.0605924	-9.82426	8.85224e-23	9.41587e-22	6165.5	6218.43	5422.68	4075.4	3919.29	3793.09
1570	RSRC2	1289.82	0.711152	0.0723915	9.82369	8.90272e-23	9.46353e-22	944.275	1039.38	950.911	1512.47	1580.68	1711.19
1571	UBE2T	1333.13	0.642595	0.0654746	9.81442	9.75933e-23	1.03675e-21	1064.04	1006.71	1052.42	1598.1	1683.4	1594.11
1572	TMEM231	561.297	0.870944	0.0887528	9.81314	9.88414e-23	1.04934e-21	390.974	403.872	395.695	686.038	740.975	750.229
1573	LIMCH1	818.795	-0.834925	0.0850959	-9.81158	1.00389e-22	1.06509e-21	976.939	1164.1	1006.85	567.549	596.37	600.964
1574	CARD8	535.368	-0.904396	0.0922079	-9.80823	1.03769e-22	1.10025e-21	705.732	715.684	672.267	344.512	375.972	398.041
1575	PARL	1329.03	0.662854	0.0675838	9.80789	1.04128e-22	1.10336e-21	1003.66	988.891	1094.89	1586.15	1668.44	1632.16
1576	PACC1	433.391	0.970682	0.098981	9.80675	1.05305e-22	1.11512e-21	281.105	291.025	306.612	600.408	549.498	571.696
1577	NCS1	5089.47	0.579242	0.0590722	9.80567	1.06443e-22	1.12646e-21	4170.05	3824.9	4249.06	6340.62	6245.93	5706.23
1578	TPRA1	1900.74	0.706062	0.0720092	9.80515	1.06984e-22	1.13147e-21	1463.92	1309.61	1561.03	2308.03	2513.13	2248.74
1579	ARID3B	2506.88	0.588681	0.0600577	9.80192	1.10463e-22	1.16752e-21	2019.21	1913.44	2074.81	2947.27	3178.31	2908.23
1580	ARRB2	4491.34	0.576472	0.0588411	9.79709	1.15876e-22	1.22396e-21	3690	3321.05	3806.75	5378.78	5540.85	5210.63
1581	SCARF2	4461.95	0.521114	0.0531975	9.79583	1.17336e-22	1.23859e-21	3729.59	3516.06	3748.74	5214.49	5478.03	5084.78
1582	PPL	217.479	-1.35907	0.138785	-9.79261	1.21132e-22	1.27786e-21	307.83	330.62	300.397	105.544	134.632	125.851
1583	TAF4B	462.851	0.986977	0.100867	9.78489	1.30743e-22	1.37838e-21	278.136	344.479	308.684	613.352	596.37	636.085
1584	CFAP298	1043.69	0.764094	0.0781003	9.7835	1.32551e-22	1.39656e-21	701.773	768.148	851.469	1344.2	1278.51	1318.02
1585	DLX3	1191.04	-0.749319	0.076625	-9.77904	1.38511e-22	1.45843e-21	1605.47	1369.01	1506.13	905.092	925.47	835.105
1586	ADAMTS10	362.062	-1.13284	0.115878	-9.77614	1.42539e-22	1.49895e-21	470.158	505.829	515.854	245.938	245.329	189.265
1587	ANAPC2	2420.05	-0.720053	0.0736536	-9.7762	1.42462e-22	1.49895e-21	3000.1	2757.81	3277.43	1873.91	1947.68	1663.38
1588	SORCS2	384.109	-1.02154	0.104497	-9.77574	1.43108e-22	1.50399e-21	513.71	517.708	512.746	258.882	231.368	270.239
1589	DENND2A	370.091	-1.04348	0.106789	-9.77147	1.49269e-22	1.56775e-21	506.781	462.275	526.212	247.929	237.351	239.995
1590	DNTTIP1	1718.03	0.620067	0.0634603	9.77095	1.5004e-22	1.57485e-21	1318.42	1310.6	1434.65	2067.07	2151.12	2026.3
1591	MAK16	367.668	1.05203	0.10768	9.76994	1.51541e-22	1.58961e-21	247.452	248.46	221.672	484.906	476.697	526.819
1592	USH1G	179.576	-1.60538	0.164335	-9.76898	1.52991e-22	1.60381e-21	265.268	252.42	293.146	107.536	92.7465	66.3401
1593	H2AFV	2676.85	-0.542095	0.0554919	-9.76891	1.53097e-22	1.60391e-21	3065.43	3236.91	3219.42	2162.66	2250.85	2125.81
1594	GBE1	941.112	0.705487	0.0722185	9.76879	1.53276e-22	1.60478e-21	716.62	731.522	698.163	1192.85	1132.9	1174.61
1595	TIMM10	854.132	0.854652	0.0874927	9.76826	1.5408e-22	1.61219e-21	568.149	558.293	699.199	1069.38	1101.99	1127.78
1596	NUDT4	761.476	0.804766	0.0824025	9.76627	1.57124e-22	1.64301e-21	504.801	588.979	569.718	962.843	947.41	995.102
1597	LARP6	1751.41	0.580048	0.0594416	9.75829	1.69996e-22	1.7765e-21	1416.41	1359.11	1436.72	2087.98	2086.3	2121.91
1598	CDH23	1153.97	-0.650691	0.0666839	-9.75784	1.70753e-22	1.78329e-21	1385.73	1414.54	1429.47	880.2	908.517	905.348
1599	ZNF561	773.491	-0.787368	0.0807121	-9.75527	1.75138e-22	1.82794e-21	970.01	1021.56	946.768	598.416	530.55	573.647
1600	RAC1	7579.38	0.432536	0.0443412	9.75472	1.7609e-22	1.83673e-21	6412.96	6516.39	6425.38	8656.62	8833.85	8631.05
1601	APAF1	1124.81	-0.779573	0.0799214	-9.75425	1.76897e-22	1.84399e-21	1421.36	1523.43	1319.67	863.273	748.953	872.178
1602	OSGIN1	99.8264	2.12633	0.218014	9.75318	1.78774e-22	1.86239e-21	32.6636	38.6054	40.3982	155.329	191.477	140.485
1603	LDLR	1371.12	0.677125	0.0694946	9.74356	1.96537e-22	2.04617e-21	1086.81	1013.64	1064.85	1757.41	1735.26	1568.75
1604	NEIL1	379.258	-1.0948	0.112372	-9.74269	1.9823e-22	2.0625e-21	478.077	493.951	578.005	233.99	261.286	230.239
1605	SRRM1	4606.98	-0.548512	0.0563679	-9.73093	2.22539e-22	2.31399e-21	5691.39	5376.05	5349.13	3842.41	3887.37	3495.54
1606	CKB	15220.5	0.537159	0.0552098	9.72943	2.25864e-22	2.3471e-21	12255.8	11721.2	13281.7	17415.8	18877.4	17771.4
1607	COL9A3	1252.97	-0.670059	0.068888	-9.7268	2.31779e-22	2.40613e-21	1550.04	1461.06	1605.57	934.963	1004.26	961.932
1608	SPINK5	168.98	-1.52008	0.156278	-9.72677	2.31832e-22	2.40613e-21	227.655	266.278	257.927	82.6432	83.771	95.6078
1609	HMBS	844.452	0.811712	0.0834539	9.72647	2.32518e-22	2.41174e-21	594.874	570.172	674.339	1042.5	1143.87	1040.95
1610	F12	323.283	1.08883	0.111973	9.72401	2.38203e-22	2.46918e-21	198.951	202.926	218.564	457.027	439.798	422.431
1611	SNTB1	296.222	1.13257	0.116482	9.72319	2.40134e-22	2.48765e-21	189.053	177.189	190.597	393.302	398.91	428.284
1612	GEN1	425.001	-1.10624	0.113783	-9.72236	2.42102e-22	2.50648e-21	558.251	646.393	536.571	285.766	229.373	293.653
1613	NOMO3	1395.92	0.644745	0.0663173	9.72212	2.42666e-22	2.51076e-21	1060.08	1096.79	1110.43	1776.33	1717.31	1614.6
1614	IGFBP6	240.215	1.39761	0.143787	9.72003	2.47705e-22	2.56131e-21	139.563	103.938	153.306	346.504	378.964	319.018
1615	PTPN9	2776.82	0.568277	0.0584909	9.71564	2.58623e-22	2.67254e-21	2213.21	2159.92	2337.91	3485.95	3260.09	3203.84
1616	JAM3	2506.98	0.535369	0.055114	9.71384	2.63225e-22	2.71842e-21	2025.14	2107.46	2008.51	2997.06	2891.1	3012.62
1617	PRRG4	948.77	-0.72019	0.0741415	-9.71372	2.6354e-22	2.71999e-21	1203.6	1216.56	1121.83	735.823	727.013	687.791
1618	TMSB15A	238.063	-1.37507	0.141686	-9.70508	2.8686e-22	2.95884e-21	325.646	356.357	349.082	103.553	138.621	155.119
1619	RFT1	1006.47	0.721719	0.0743835	9.70268	2.93691e-22	3.02743e-21	753.243	718.654	807.964	1292.42	1266.54	1199.98
1620	ZNF518A	587.207	-0.957984	0.098739	-9.70219	2.95097e-22	3.04005e-21	761.161	857.237	707.486	395.293	365.002	437.064
1621	CELSR2	5368.6	-0.495743	0.0511242	-9.69685	3.10947e-22	3.20135e-21	6509.96	6116.48	6219.25	4535.42	4550.56	4279.91
1622	SEPTIN8	3877.83	-0.478384	0.049403	-9.68331	3.55044e-22	3.6531e-21	4544.2	4431.7	4569.14	3237.02	3194.27	3290.67
1623	STT3A	5744.25	0.462988	0.0478256	9.68076	3.64004e-22	3.74298e-21	4885.68	4701.94	4903.72	6795.66	6517.19	6661.33
1624	DNM2	8519.98	0.508154	0.0525528	9.66939	4.06787e-22	4.18033e-21	7005.85	6757.92	7341.07	10137.2	10372.6	9505.18
1625	RCOR2	1203.24	0.712161	0.0736565	9.66868	4.09631e-22	4.20697e-21	946.255	838.43	951.947	1513.47	1554.75	1414.61
1626	STRN4	7847.69	0.503268	0.0520628	9.66657	4.18165e-22	4.28934e-21	6504.02	6218.43	6755.82	8970.27	9642.64	8994.94
1627	ZNF43	486.588	-0.927994	0.0960004	-9.66657	4.18163e-22	4.28934e-21	639.415	665.2	609.08	343.517	309.155	353.164
1628	YIPF2	2456.16	0.651613	0.0674118	9.66615	4.19865e-22	4.30413e-21	1892.51	1802.57	2037.52	2856.67	3252.11	2895.55
1629	YIF1B	3910.55	0.509538	0.05273	9.66317	4.32296e-22	4.42885e-21	3227.76	3114.17	3339.58	4609.1	4719.1	4453.57
1630	AZIN1	3114.42	0.534276	0.0552964	9.66203	4.37112e-22	4.4727e-21	2546.77	2616.26	2469.47	3719.94	3525.36	3808.7
1631	PTBP1	23625.2	0.462855	0.0479044	9.66207	4.36963e-22	4.4727e-21	20044.6	19155.2	20403.2	27934.4	28058.3	26155.6
1632	KAT6B	1317.29	-0.761934	0.0788599	-9.66187	4.37778e-22	4.47676e-21	1627.24	1815.44	1528.92	1038.52	898.544	995.102
1633	UBIAD1	1093.11	0.752503	0.0779133	9.65822	4.53685e-22	4.63659e-21	789.866	776.067	877.366	1411.9	1441.06	1262.41
1634	SUSD2	319.835	-1.08892	0.112753	-9.65753	4.56736e-22	4.66491e-21	449.372	417.73	438.165	213.08	210.425	190.24
1635	ZNF462	1354.65	-0.72166	0.0747406	-9.65552	4.65789e-22	4.75447e-21	1752.95	1764.96	1541.35	1096.27	975.334	997.053
1636	MRPL38	3115.6	0.547779	0.0567371	9.65468	4.69641e-22	4.79085e-21	2544.79	2430.16	2618.63	3722.93	3843.49	3533.59
1637	MXD3	547.793	-1.10461	0.114414	-9.65451	4.70411e-22	4.79578e-21	706.722	650.352	886.688	315.637	383.951	343.408
1638	ADGRE2	129.139	1.74675	0.180927	9.65444	4.70709e-22	4.79588e-21	66.317	51.4738	60.0793	199.14	214.414	183.411
1639	NOG	578.06	0.902489	0.093494	9.65291	4.77785e-22	4.86501e-21	357.32	414.76	437.129	737.814	735.988	785.35
1640	EXOC3	2993.46	-0.551849	0.0571885	-9.64965	4.93244e-22	5.01936e-21	3538.56	3417.07	3721.81	2442.45	2511.14	2329.71
1641	DDX6	2188.38	-0.722258	0.0749071	-9.64205	5.31154e-22	5.40185e-21	2797.19	2896.39	2480.86	1827.11	1569.71	1558.99
1642	GSTM2	924.669	-0.79308	0.0823291	-9.63304	5.79864e-22	5.89363e-21	1138.28	1106.69	1273.06	648.201	733.994	647.792
1643	CRMP1	299.94	-1.20311	0.124934	-9.63002	5.97163e-22	6.06576e-21	367.218	447.426	440.237	173.252	170.534	200.972
1644	PMP22	1227.86	0.662278	0.0687958	9.62673	6.16615e-22	6.25955e-21	916.561	978.003	958.162	1429.83	1561.73	1522.9
1645	ABCA7	1016.45	-0.772108	0.0802054	-9.62664	6.17127e-22	6.26093e-21	1265.96	1199.74	1380.79	758.724	801.808	691.693
1646	C1S	160.141	-1.61333	0.167607	-9.62569	6.2288e-22	6.31545e-21	260.319	231.632	232.031	87.6217	88.7574	60.4866
1647	PEAR1	159.218	1.56744	0.162929	9.6204	6.55739e-22	6.64458e-21	85.1234	80.1804	75.6171	212.084	263.28	239.02
1648	KCNMA1	87.7446	2.19514	0.228191	9.61974	6.59974e-22	6.68343e-21	28.7044	37.6155	27.968	128.445	149.591	154.143
1649	FRMPD2	52.246	-3.36666	0.350041	-9.6179	6.71858e-22	6.79966e-21	94.0316	86.1197	105.657	10.9527	5.98364	10.7315
1650	RP9	477.113	0.912739	0.0949262	9.61525	6.89446e-22	6.97343e-21	324.657	322.701	345.974	602.399	612.326	654.621
1651	ISOC2	1606.88	0.688247	0.0716441	9.60646	7.50849e-22	7.5899e-21	1205.58	1132.42	1354.89	1902.78	2011.5	2034.11
1652	NOS2	274.277	1.23393	0.128476	9.60441	7.65988e-22	7.73824e-21	161.338	147.492	182.31	409.233	400.904	344.383
1653	TNFRSF21	1922.86	0.610936	0.0636119	9.60412	7.68149e-22	7.75537e-21	1562.9	1441.27	1561.03	2425.53	2342.6	2203.86
1654	FAT1	7793.74	-0.619816	0.0645672	-9.59955	8.02971e-22	8.10204e-21	9564.5	10000.8	8762.26	6635.35	5644.57	6155
1655	CLSTN3	2824.43	-0.551952	0.0575005	-9.59907	8.06694e-22	8.13469e-21	3311.89	3210.19	3552.97	2323.97	2304.7	2242.88
1656	COX20	739.951	-0.744882	0.0776714	-9.59016	8.79451e-22	8.86302e-21	921.51	945.337	913.62	551.618	553.487	554.135
1657	STON1	463.39	-0.961481	0.100273	-9.58862	8.92704e-22	8.99115e-21	606.751	654.312	575.933	293.732	308.158	341.457
1658	NOMO2	1401.86	0.610003	0.0636472	9.58412	9.32508e-22	9.38638e-21	1122.44	1076	1131.15	1714.6	1715.31	1651.67
1659	RAP1GAP	541.674	0.862989	0.0900795	9.5803	9.67655e-22	9.7343e-21	393.943	358.337	400.874	704.956	707.067	684.864
1660	HMGN2	14026.4	-0.474654	0.0495623	-9.57691	9.99889e-22	1.00525e-20	16236.8	15856.9	16846	11609.9	12324.3	11284.7
1661	ETS2	1842.71	0.572656	0.0598151	9.57376	1.03084e-21	1.03574e-20	1467.88	1465.02	1512.34	2203.49	2279.77	2127.76
1662	TCEA2	1005.78	-0.733145	0.076596	-9.57158	1.05281e-21	1.05718e-20	1244.19	1193.8	1330.03	740.801	808.789	717.059
1663	RPL7L1	9240.46	0.511253	0.0534416	9.56657	1.10515e-21	1.10907e-20	7436.42	7972.5	7450.87	10739.6	11480.6	10362.7
1664	IKZF4	602.571	-0.807279	0.0844122	-9.56354	1.13801e-21	1.14136e-20	775.018	760.229	765.494	426.16	437.803	450.723
1665	ARNTL	663.31	0.803293	0.0840323	9.55934	1.18508e-21	1.18786e-20	492.924	500.88	455.774	848.337	808.789	873.153
1666	PRR13	3829.73	0.579126	0.0605952	9.5573	1.2087e-21	1.21081e-20	3114.92	2852.84	3246.36	4556.33	4816.83	4391.13
1667	ATP1B1	1348.44	0.623597	0.0652548	9.55634	1.21994e-21	1.22133e-20	1040.29	1094.81	1049.32	1602.08	1607.61	1696.55
1668	EIF4ENIF1	1155.73	-0.64899	0.0679143	-9.55601	1.22379e-21	1.22445e-20	1413.44	1377.91	1442.94	868.251	928.462	903.397
1669	GOLGA8A	568.627	-0.839595	0.0878746	-9.55447	1.2422e-21	1.24212e-20	756.212	692.917	739.597	405.25	414.866	402.919
1670	BACE1	2474.6	-0.539772	0.0565014	-9.55325	1.25687e-21	1.25604e-20	2797.19	2990.43	3009.15	2037.2	2022.47	1991.18
1671	TACO1	1650.09	0.695769	0.0728318	9.5531	1.25867e-21	1.25709e-20	1207.56	1227.45	1344.53	1947.59	2234.89	1938.5
1672	ZNF652	1035.98	-0.712	0.0746081	-9.54319	1.38503e-21	1.38246e-20	1290.71	1365.05	1203.66	801.539	753.939	800.96
1673	GRN	10440.4	-0.488882	0.0512573	-9.5378	1.459e-21	1.45542e-20	12154.8	11641	12782.4	8723.33	8970.48	8370.56
1674	CPEB1	435.75	0.953933	0.100056	9.53397	1.51387e-21	1.50925e-20	289.023	307.853	293.146	592.442	599.362	532.672
1675	HOMER3	804.525	0.736706	0.0772835	9.53251	1.53519e-21	1.5296e-20	596.853	587	626.69	1023.58	1027.19	965.834
1676	TMBIM1	2096.69	0.600198	0.0629648	9.53228	1.53868e-21	1.53216e-20	1740.08	1577.87	1682.22	2662.5	2489.2	2428.24
1677	MRPS2	8154.15	0.553741	0.0581025	9.53041	1.56657e-21	1.559e-20	6506	6216.46	7102.83	9668.25	10165.2	9266.16
1678	VPS37C	2662.14	0.589664	0.0618839	9.52856	1.59485e-21	1.5862e-20	2222.12	1990.65	2163.89	3298.76	3276.05	3021.4
1679	KLHL21	1801.74	0.612294	0.064288	9.52424	1.66256e-21	1.65256e-20	1449.08	1323.47	1503.02	2232.36	2162.09	2140.45
1680	NEDD4L	4428.22	0.492597	0.051728	9.52285	1.68501e-21	1.67288e-20	3717.71	3795.21	3525	5292.15	5045.21	5194.04
1681	PHGDH	9294.84	0.537499	0.056443	9.52287	1.68459e-21	1.67288e-20	7537.38	7065.77	8146.97	11060.2	11311.1	10647.6
1682	BAX	3122.06	-0.604926	0.0635258	-9.52253	1.69008e-21	1.67692e-20	3692.97	3579.41	4029.46	2382.71	2652.75	2395.07
1683	RAPGEF3	233.252	1.30937	0.13757	9.5178	1.7688e-21	1.75398e-20	131.644	122.745	148.127	368.409	328.103	300.482
1684	CDK7	494.517	0.898984	0.0944657	9.51651	1.79094e-21	1.77488e-20	328.616	366.256	340.795	616.339	673.16	641.938
1685	DPM2	2282.6	0.631481	0.0663625	9.51563	1.80611e-21	1.78885e-20	1807.39	1695.67	1869.71	2833.76	2934.98	2554.1
1686	SRSF8	1005.72	-0.686378	0.0721368	-9.51496	1.81791e-21	1.79947e-20	1230.33	1292.79	1198.48	775.651	742.969	794.13
1687	BCKDK	4261.23	0.586489	0.06165	9.51321	1.8487e-21	1.82887e-20	3345.55	3223.05	3652.41	5016.34	5450.1	4879.9
1688	ADGRL2	2027.33	-0.705472	0.0741685	-9.51175	1.8749e-21	1.85368e-20	2521.04	2765.73	2252.98	1568.23	1457.02	1598.99
1689	RNF187	8321.66	0.487705	0.0512778	9.51103	1.88786e-21	1.86539e-20	6966.26	6532.23	7287.21	9597.56	9861.05	9685.66
1690	CHAMP1	1172.82	-0.646171	0.0679601	-9.50809	1.94187e-21	1.91762e-20	1462.93	1465.02	1365.25	925.006	905.525	913.152
1691	ARCN1	5041.95	0.485165	0.0510293	9.50758	1.95144e-21	1.92593e-20	4182.92	4313.9	4109.22	5971.22	5633.6	6040.85
1692	MYO5B	1342.37	0.622362	0.0654614	9.50731	1.95651e-21	1.9298e-20	1093.74	1050.26	1027.56	1584.16	1616.58	1681.92
1693	PRODH	261.942	-1.19777	0.125999	-9.50621	1.97738e-21	1.94923e-20	350.391	347.448	396.731	155.329	170.534	151.216
1694	RBBP4	5558.68	-0.442055	0.0465026	-9.50603	1.98083e-21	1.95148e-20	6445.62	6460.96	6304.19	4778.37	4720.1	4642.83
1695	VASH1	1527.02	-0.652734	0.0686719	-9.50511	1.99842e-21	1.96765e-20	1942.99	1728.33	1928.75	1193.85	1230.64	1137.54
1696	DENR	2375.84	0.580482	0.0610858	9.50273	2.04453e-21	2.01186e-20	1860.84	1998.57	1853.14	2717.27	2825.28	2999.94
1697	CHD3	7271.33	-0.503044	0.0529552	-9.49944	2.1103e-21	2.07536e-20	8643.98	8259.57	8675.25	6165.38	6242.94	5640.86
1698	F10	391.932	-1.03589	0.10914	-9.49133	2.28106e-21	2.24197e-20	526.577	472.173	582.148	260.874	250.316	259.507
1699	ARL14	49.1361	4.82613	0.508599	9.48907	2.3311e-21	2.2898e-20	2.96942	4.94941	2.0717	84.6346	98.7301	101.461
1700	L1CAM	839.489	-0.733899	0.0773733	-9.48517	2.41978e-21	2.37551e-20	1081.86	998.79	1064.85	650.193	641.247	599.988
1701	MCM5	5250.07	-0.589755	0.0622209	-9.47842	2.58167e-21	2.53295e-20	6287.25	5845.25	6793.11	4242.68	4379.03	3953.09
1702	ZNF117	83.6595	-2.17406	0.229389	-9.47761	2.60175e-21	2.55115e-20	139.563	135.614	135.696	36.8409	26.9264	27.3165
1703	COX10	751.321	0.783833	0.0827159	9.47621	2.63693e-21	2.58413e-20	527.567	535.526	593.542	930.98	1003.26	917.055
1704	HAX1	3502.32	0.537497	0.056724	9.47565	2.65107e-21	2.59646e-20	2778.39	2746.92	3047.47	4045.53	4247.39	4148.21
1705	DAGLB	1105.45	0.716563	0.0756881	9.46732	2.87111e-21	2.81032e-20	830.448	777.057	902.226	1342.2	1452.03	1328.75
1706	JDP2	620.258	0.811182	0.0857075	9.46454	2.9487e-21	2.88457e-20	444.423	466.234	440.237	751.754	825.743	793.155
1707	DNAJC4	1785.21	-0.629886	0.0665627	-9.46305	2.99077e-21	2.92402e-20	2225.09	2022.33	2259.19	1419.87	1458.01	1326.8
1708	EIF3L	8855.93	-0.433251	0.0457876	-9.46219	3.01548e-21	2.94645e-20	9895.1	10180.9	10451.7	7602.18	7408.75	7596.92
1709	AFAP1L1	530.855	0.896317	0.0947649	9.45833	3.12913e-21	3.0557e-20	343.463	370.216	399.838	646.21	721.029	704.376
1710	FN1	11581.9	-0.445343	0.0470893	-9.45741	3.15663e-21	3.08076e-20	13696.9	13376.3	12992.7	10087.4	9880.99	9457.37
1711	PPIE	2064.64	0.618262	0.0653974	9.45392	3.26387e-21	3.18356e-20	1620.31	1516.5	1750.59	2392.67	2539.06	2568.73
1712	PDHA1	4388.43	0.468724	0.0496077	9.44863	3.43308e-21	3.34665e-20	3690.99	3566.54	3788.11	5157.73	5051.19	5076
1713	FAT3	565.809	-0.957075	0.101301	-9.44781	3.45987e-21	3.37079e-20	762.151	797.844	680.554	423.173	333.09	398.041
1714	RHOB	5963.26	0.490345	0.0519191	9.4444	3.5743e-21	3.48025e-20	4890.63	4889.02	5099.49	6760.81	6793.43	7346.19
1715	NUP37	742.763	0.74941	0.0793745	9.44145	3.6766e-21	3.57777e-20	552.312	571.162	538.642	896.131	934.446	963.883
1716	CCDC8	2045.23	-0.636081	0.0673775	-9.44055	3.70825e-21	3.60647e-20	2483.42	2290.59	2693.21	1569.22	1655.47	1579.48
1717	SLC16A3	548.237	0.936992	0.0993246	9.43363	3.96127e-21	3.8503e-20	356.33	361.307	411.233	737.814	777.874	644.865
1718	GABARAP	6567.55	-0.583032	0.0618058	-9.43329	3.97423e-21	3.86065e-20	7433.45	7514.19	8683.54	5113.92	5425.17	5235.02
1719	DNAH14	638.66	0.793088	0.0840921	9.43118	4.05494e-21	3.93676e-20	446.403	468.214	487.886	800.543	792.833	836.081
1720	SEMA7A	277.809	1.14607	0.121584	9.42619	4.25252e-21	4.12618e-20	181.135	154.421	183.346	379.362	395.918	372.675
1721	TRAPPC12	1279.24	-0.645373	0.0684869	-9.4233	4.37116e-21	4.23884e-20	1515.39	1557.08	1609.71	946.911	1055.12	991.2
1722	SPOCK1	340.461	1.06275	0.112781	9.42309	4.37997e-21	4.24491e-20	226.666	237.572	196.812	441.095	455.754	484.868
1723	C1RL	1137.29	-0.645862	0.0685681	-9.41929	4.54167e-21	4.39907e-20	1375.83	1362.08	1425.33	920.028	853.667	886.812
1724	ADAM12	78.6499	2.26539	0.240612	9.4151	4.72618e-21	4.57513e-20	30.684	29.6964	20.717	136.411	123.662	130.729
1725	SOGA1	2055.84	-0.552713	0.0587237	-9.41208	4.86394e-21	4.70576e-20	2538.85	2344.04	2451.86	1678.75	1643.51	1678.02
1726	CFAP44	105.303	-1.85886	0.197509	-9.4115	4.89113e-21	4.72932e-20	177.175	154.421	163.664	44.8065	46.8719	44.8772
1727	ATXN1L	1067.42	-0.670402	0.0712478	-9.40944	4.98774e-21	4.81994e-20	1366.92	1261.11	1305.17	847.341	789.841	834.13
1728	TUFM	8211.77	0.547125	0.0581689	9.4058	5.16378e-21	4.98718e-20	6548.56	6264.96	7206.41	9701.11	10173.2	9376.4
1729	DNAH11	152.765	1.53702	0.163427	9.4049	5.20821e-21	5.02717e-20	73.2457	91.0691	70.4378	231.003	229.373	221.459
1730	MRPS23	899.788	0.708346	0.0753195	9.40455	5.22556e-21	5.04101e-20	641.395	696.876	711.629	1120.16	1140.88	1087.78
1731	HOXC5	240.595	1.19814	0.127498	9.39731	5.59743e-21	5.39662e-20	142.532	145.513	150.198	321.611	351.04	332.676
1732	CYS1	287.38	-1.12074	0.119324	-9.39243	5.86306e-21	5.64945e-20	376.126	395.953	409.161	164.291	189.482	189.265
1733	PRRT3	424.621	-1.06791	0.113715	-9.39114	5.93541e-21	5.71588e-20	520.638	540.475	663.98	295.723	273.253	253.653
1734	CCNA2	2481.88	0.522719	0.0556799	9.38793	6.11909e-21	5.88936e-20	1986.54	2120.33	2004.37	2902.47	2901.07	2976.53
1735	ISYNA1	7109.26	-0.506507	0.0539566	-9.38731	6.1554e-21	5.92089e-20	8052.08	8157.61	8824.41	5709.35	6153.18	5758.91
1736	SOX12	5168.26	-0.517249	0.0551248	-9.38322	6.39873e-21	6.15141e-20	6312.99	5766.06	6175.74	4456.76	4201.52	4096.5
1737	STARD4	634.66	-0.820016	0.0874166	-9.38055	6.5632e-21	6.30589e-20	778.978	876.045	775.852	465.988	443.787	467.308
1738	PDHX	1372.62	0.628269	0.0669794	9.38004	6.59491e-21	6.33271e-20	1060.08	1123.52	1051.39	1718.58	1581.68	1700.45
1739	LTV1	423.242	0.995375	0.106131	9.37872	6.6776e-21	6.40842e-20	262.299	322.701	263.106	553.61	547.503	590.232
1740	ZNF275	1560.83	-0.570541	0.0608614	-9.37443	6.95484e-21	6.67065e-20	1882.61	1866.92	1846.92	1223.72	1277.51	1267.29
1741	RCL1	649.81	0.799737	0.0853313	9.37215	7.10699e-21	6.81267e-20	441.454	510.779	470.276	828.423	814.773	833.154
1742	MTCL1	821.116	-0.709918	0.075781	-9.36801	7.39096e-21	7.08082e-20	1050.18	1011.66	995.453	625.3	638.255	605.842
1743	RADIL	942.07	0.746992	0.0797672	9.36465	7.63036e-21	7.30598e-20	666.14	674.109	770.673	1186.88	1235.62	1119
1744	KANK2	2982.37	-0.487539	0.0520749	-9.36227	7.80401e-21	7.46796e-20	3507.87	3443.8	3492.89	2528.08	2501.16	2420.44
1745	VPS9D1	1260.34	0.67182	0.0717677	9.36104	7.89579e-21	7.55146e-20	984.857	922.569	1008.92	1602.08	1604.61	1439
1746	PER3	553.192	-0.839338	0.0897297	-9.35406	8.43425e-21	8.06181e-20	727.508	736.472	665.016	400.272	387.94	401.943
1747	TMEM132A	3699.64	-0.537894	0.0575253	-9.35056	8.71817e-21	8.32842e-20	4452.15	4139.68	4552.56	3058.79	3124.46	2870.19
1748	SKA1	734.408	0.744093	0.0796138	9.34628	9.07805e-21	8.66725e-20	562.21	550.374	534.499	935.959	943.421	879.982
1749	NDUFAF4	340.965	1.04543	0.111887	9.34365	9.30719e-21	8.88094e-20	213.798	245.491	208.206	439.104	479.689	459.503
1750	ZBTB2	674.717	0.798487	0.0854693	9.34238	9.41931e-21	8.98279e-20	478.077	538.495	460.954	876.217	850.675	843.886
1751	SLC43A2	441.19	0.921788	0.0986691	9.34222	9.43369e-21	8.99137e-20	293.973	307.853	312.827	543.653	609.334	579.501
1752	TMEM43	2030.99	0.54623	0.0584904	9.3388	9.74315e-21	9.28102e-20	1682.67	1599.65	1670.83	2376.74	2492.19	2363.86
1753	EXOC4	1518.06	-0.608397	0.0651636	-9.33646	9.96105e-21	9.48317e-20	1731.17	1922.35	1846.92	1213.76	1214.68	1179.49
1754	PSME1	1877.68	-0.661113	0.070813	-9.33604	1.00001e-20	9.51496e-20	2182.52	2208.43	2510.9	1452.73	1541.79	1369.73
1755	KMT5A	2483.26	0.526501	0.0563982	9.33542	1.00593e-20	9.56579e-20	2046.92	1957.99	2100.71	2888.53	3014.76	2890.67
1756	CCDC43	1248.09	0.605074	0.0648704	9.32743	1.08472e-20	1.03091e-19	995.745	998.79	975.771	1509.48	1480.95	1527.77
1757	ZMYND19	3862.61	0.559845	0.060029	9.32624	1.09693e-20	1.04193e-19	3146.59	2876.6	3344.76	4528.45	4730.07	4549.18
1758	OSBPL6	596.439	0.799869	0.0857977	9.32273	1.1338e-20	1.07633e-19	434.525	449.406	421.591	740.801	746.958	785.35
1759	RBM4	1960.06	-0.547437	0.0587339	-9.32063	1.1565e-20	1.09726e-19	2355.74	2253.96	2373.13	1544.33	1620.57	1612.65
1760	TRIM32	2534.72	-0.543631	0.0583262	-9.32053	1.15764e-20	1.09771e-19	2986.25	2967.66	3066.12	2164.65	2079.32	1944.35
1761	JPH3	655.107	0.794655	0.0852831	9.31785	1.18718e-20	1.12446e-19	472.138	471.184	494.101	811.496	888.571	793.155
1762	SBDS	1173.55	0.681504	0.0731392	9.3179	1.18661e-20	1.12446e-19	855.193	902.772	946.768	1374.07	1420.12	1542.41
1763	RCE1	1372.65	0.631206	0.0677563	9.31584	1.20993e-20	1.14535e-19	1068	1029.48	1134.26	1596.11	1675.42	1732.65
1764	GAS6	1077.05	-0.757868	0.0813579	-9.31523	1.21684e-20	1.15124e-19	1282.79	1267.05	1511.31	834.397	804.8	761.936
1765	SSBP2	1039.33	-0.654496	0.0702697	-9.31406	1.23034e-20	1.16335e-19	1272.89	1279.92	1260.63	824.44	767.901	830.227
1766	HSP90B1	21018.1	0.555881	0.0596966	9.31176	1.25729e-20	1.18816e-19	16509	18382.1	16163.4	24504.2	23771	26779
1767	ZNF704	829.872	-0.786719	0.0844925	-9.31111	1.26508e-20	1.19484e-19	1036.33	1154.2	961.269	632.27	586.397	608.768
1768	DDX18	1476.87	0.656761	0.0705564	9.30831	1.29886e-20	1.22605e-19	1165	1228.44	1045.17	1769.36	1778.14	1875.08
1769	IFI30	1154.93	0.673167	0.0723631	9.30263	1.37012e-20	1.29259e-19	860.142	859.217	951.947	1350.17	1474.97	1433.14
1770	PAXX	3111.3	0.66749	0.071787	9.2982	1.42837e-20	1.34679e-19	2392.36	2188.63	2632.1	3510.84	4066.88	3877
1771	WFS1	2248.61	-0.585848	0.0630255	-9.29541	1.46641e-20	1.38187e-19	2731.87	2602.4	2762.61	1777.33	1928.73	1688.75
1772	HES7	126.052	1.69888	0.182868	9.29017	1.5404e-20	1.45077e-19	60.3782	48.5042	69.402	193.166	201.449	183.411
1773	ATF7IP	3006.73	-0.623185	0.0670812	-9.29001	1.54275e-20	1.45217e-19	3689.01	3920.92	3328.19	2505.18	2247.86	2349.22
1774	TEX261	5182.1	0.518175	0.0557842	9.28892	1.55861e-20	1.46627e-19	4272.99	4089.2	4422.05	6264.95	6314.74	5728.67
1775	RC3H1	524.075	-0.872145	0.0939059	-9.28743	1.58054e-20	1.48607e-19	694.844	711.725	626.69	389.319	356.027	365.846
1776	MYO6	2125.53	-0.599986	0.0646104	-9.28621	1.59884e-20	1.50242e-19	2547.76	2744.94	2390.74	1699.66	1632.54	1737.53
1777	KIAA1324	204.133	1.30982	0.141143	9.28009	1.69332e-20	1.59031e-19	112.838	107.897	131.553	300.702	274.25	297.555
1778	EPHX2	411.671	-0.969628	0.104489	-9.27968	1.69996e-20	1.59565e-19	508.761	544.435	582.148	282.779	256.299	295.604
1779	NICN1	645.6	-0.906464	0.0976837	-9.27958	1.70144e-20	1.59614e-19	878.948	782.996	863.899	433.13	516.588	398.041
1780	FAM43B	365.956	-0.978586	0.105573	-9.26924	1.8747e-20	1.75769e-19	493.913	485.042	477.527	264.856	236.354	238.044
1781	CYP2S1	1058.67	0.664928	0.0717398	9.26861	1.88581e-20	1.76711e-19	836.386	768.148	852.505	1293.42	1331.36	1270.22
1782	PALLD	3728.24	-0.492081	0.0530931	-9.26825	1.89219e-20	1.7721e-19	4380.88	4532.67	4159.98	3062.78	3099.53	3133.6
1783	MYH10	6844.93	-0.489302	0.0528123	-9.26492	1.9523e-20	1.82736e-19	8070.88	8365.49	7547.21	5821.86	5516.92	5747.2
1784	POLD4	1306.87	0.634257	0.068466	9.26383	1.97234e-20	1.84509e-19	1001.68	996.811	1074.18	1577.19	1668.44	1522.9
1785	URB1	1646.79	0.574309	0.0620307	9.25846	2.07408e-20	1.93918e-19	1374.84	1295.75	1298.96	1995.38	2010.5	1905.33
1786	ABITRAM	874.012	0.716661	0.0774204	9.25675	2.10749e-20	1.96931e-19	658.221	703.806	621.51	1102.24	1045.14	1113.15
1787	UBE2C	3696.17	0.516756	0.0558355	9.25496	2.14303e-20	2.0014e-19	2962.49	2933.02	3228.75	4267.57	4486.74	4298.45
1788	SRSF9	2544.52	0.639729	0.0691269	9.25441	2.15421e-20	2.01072e-19	2072.65	1779.81	2116.24	3252.95	3084.57	2960.92
1789	ARPC1B	1347.37	0.693926	0.0749974	9.25268	2.18943e-20	2.04245e-19	979.908	978.003	1131.15	1559.27	1699.36	1736.55
1790	ISL2	643.236	0.812383	0.0878399	9.24845	2.27768e-20	2.12358e-19	501.832	440.497	457.846	789.591	871.618	798.033
1791	PSMF1	7329.46	0.489266	0.052908	9.24749	2.29837e-20	2.14168e-19	6312.99	5811.59	6170.56	8723.33	8819.89	8138.37
1792	CNPPD1	812.653	0.744429	0.0805306	9.24405	2.37337e-20	2.21033e-19	625.558	563.243	633.941	998.688	1072.07	982.419
1793	GRAMD1B	756.794	0.761255	0.082384	9.24033	2.45728e-20	2.2872e-19	567.159	557.303	560.395	1030.55	898.544	926.811
1794	NRBP1	3276.01	0.497226	0.0538269	9.2375	2.5232e-20	2.34725e-19	2643.77	2649.91	2857.91	3833.45	3855.46	3815.53
1795	TBX3	1595.11	-0.557814	0.0604249	-9.23153	2.66799e-20	2.48057e-19	1941.01	1899.58	1858.32	1294.41	1293.46	1283.88
1796	SVEP1	801.769	-0.727137	0.0787713	-9.23098	2.68166e-20	2.49188e-19	996.735	1031.46	970.592	643.223	576.424	592.183
1797	BCAM	3360.53	-0.543562	0.0588876	-9.2305	2.69373e-20	2.50171e-19	4011.69	3769.47	4177.59	2799.91	2814.31	2590.19
1798	CXCR4	231.714	1.25946	0.13647	9.22886	2.73526e-20	2.53886e-19	138.573	142.543	128.445	293.732	322.12	364.871
1799	GOSR2	1960.61	0.548861	0.059516	9.22206	2.91436e-20	2.7036e-19	1593.59	1571.93	1610.75	2417.56	2341.6	2228.25
1800	PDRG1	812.26	0.763111	0.0827782	9.21874	3.00619e-20	2.78724e-19	560.23	576.111	671.231	1012.63	1020.21	1033.15
1801	TES	2516	0.550449	0.0597295	9.2157	3.09245e-20	2.86563e-19	2105.32	2090.63	1928.75	3118.53	2881.12	2971.65
1802	DARS	1243.82	0.69048	0.074945	9.21316	3.16675e-20	2.93285e-19	882.907	1023.54	948.839	1523.42	1452.03	1632.16
1803	HNRNPM	8697.47	0.418567	0.0454413	9.21116	3.22625e-20	2.9863e-19	7471.06	7309.28	7553.42	9953.03	10180.2	9717.85
1804	BTBD7	1179.98	-0.747855	0.0812539	-9.20393	3.45099e-20	3.19255e-19	1527.27	1606.58	1303.1	920.028	851.672	871.202
1805	BSG	28465.5	0.552795	0.0600635	9.20351	3.46455e-20	3.20332e-19	22083.6	22024.9	25125.6	32510.6	36121.3	32927.1
1806	CRYL1	591.816	-0.793867	0.0862633	-9.20283	3.48653e-20	3.22186e-19	771.059	718.654	762.386	426.16	424.839	447.796
1807	PRPH	357.83	-0.973821	0.105865	-9.19872	3.62245e-20	3.3456e-19	463.229	461.285	498.244	240.96	240.343	242.922
1808	PSMD1	3771.52	0.490951	0.0533724	9.19858	3.62715e-20	3.34809e-19	3121.85	3259.68	3025.72	4557.32	4323.18	4341.38
1809	ATAD3A	2331.31	0.713831	0.0776396	9.19416	3.77933e-20	3.48664e-19	1740.08	1646.17	1912.18	2953.25	3172.33	2563.85
1810	TMEM127	1529.18	-0.61304	0.066682	-9.19347	3.80351e-20	3.50701e-19	1924.18	1808.51	1814.81	1285.45	1198.72	1143.39
1811	MSX2	2014.36	-0.578895	0.0629757	-9.19235	3.84351e-20	3.54193e-19	2418.1	2349.98	2471.54	1517.45	1723.29	1605.82
1812	CNIH2	490.151	-0.875915	0.0953751	-9.18389	4.15776e-20	3.82941e-19	650.303	604.818	648.443	337.543	372.981	326.823
1813	ZFYVE1	541.196	-0.806051	0.0877897	-9.18162	4.24666e-20	3.90913e-19	699.793	678.069	687.805	395.293	398.91	387.309
1814	MCL1	4200.46	0.478319	0.0521035	9.18018	4.30379e-20	3.95953e-19	3514.8	3652.66	3363.41	4835.12	4839.77	4996.97
1815	RASA3	646.887	0.771052	0.0840289	9.17604	4.47256e-20	4.11254e-19	488.964	458.315	486.85	854.311	795.825	797.057
1816	SHC2	1225.32	-0.704837	0.0768574	-9.17072	4.69866e-20	4.31806e-19	1444.13	1521.45	1591.07	845.35	1018.22	931.689
1817	ABTB2	1212.68	0.650703	0.0709555	9.17058	4.70464e-20	4.32118e-19	986.837	878.025	966.449	1491.56	1529.82	1423.39
1818	WDR45B	4072.62	0.470925	0.0513526	9.17041	4.71221e-20	4.32574e-19	3453.43	3397.27	3390.34	4687.76	4925.54	4581.37
1819	FERMT2	1317.49	0.630888	0.0688013	9.16971	4.74275e-20	4.34992e-19	1053.15	1086.89	961.269	1570.22	1584.67	1648.75
1820	SLC9A3R2	2457.22	0.61222	0.0667656	9.16969	4.74376e-20	4.34992e-19	1902.41	1810.49	2118.31	2996.06	3098.53	2817.5
1821	GOLIM4	1903	-0.559785	0.0610598	-9.1678	4.82754e-20	4.42379e-19	2244.88	2386.6	2171.14	1554.29	1510.87	1550.21
1822	MECR	919.32	0.734118	0.0800761	9.16776	4.82961e-20	4.42379e-19	717.61	628.575	725.095	1099.25	1214.68	1130.71
1823	TESK2	438.214	-0.897563	0.098013	-9.15759	5.30712e-20	4.8585e-19	575.078	545.425	590.435	322.607	298.185	297.555
1824	DOCK4	320.571	-1.07113	0.116969	-9.15736	5.31804e-20	4.86583e-19	466.199	450.396	386.372	203.123	214.414	202.923
1825	PMEPA1	1311.4	0.668088	0.0729904	9.1531	5.5325e-20	5.05928e-19	1041.28	989.881	1007.88	1541.34	1762.18	1525.82
1826	ERI3	4422.5	0.547597	0.0598392	9.15114	5.63346e-20	5.14878e-19	3555.38	3378.47	3846.11	5167.69	5530.88	5056.48
1827	ERC1	4820.27	-0.558575	0.0610687	-9.14666	5.8721e-20	5.36396e-19	5795.32	6128.36	5301.48	4103.28	3775.68	3817.48
1828	KLF2	328.442	1.01532	0.111068	9.14147	6.16116e-20	5.62492e-19	219.737	210.845	221.672	463.001	439.798	415.601
1829	ILF3	22745.7	0.448763	0.0491076	9.13836	6.34038e-20	5.78538e-19	19614	18407.8	19687.4	26838.1	26894.5	25032.7
1830	GABBR1	473.139	-0.858606	0.0940313	-9.13107	6.78245e-20	6.18537e-19	593.884	620.656	615.295	344.512	319.128	345.359
1831	LSM10	592.729	0.807847	0.0884964	9.12858	6.94019e-20	6.32576e-19	408.79	425.649	458.882	723.874	748.953	790.228
1832	BDH2	431.688	-0.930736	0.10197	-9.12759	7.00428e-20	6.3807e-19	608.731	523.647	566.61	294.727	284.223	312.189
1833	DZIP3	687.921	-0.787777	0.0863258	-9.12563	7.13223e-20	6.49371e-19	860.142	917.62	835.932	483.911	479.689	550.233
1834	DLL3	435.086	0.905912	0.0992832	9.12452	7.20563e-20	6.55697e-19	298.922	299.934	309.719	556.597	538.528	606.817
1835	DPY19L4	672.642	-0.798339	0.087524	-9.12137	7.41782e-20	6.74637e-19	858.162	909.701	794.497	478.932	468.719	525.843
1836	HIGD2A	1691.13	-0.579793	0.0636278	-9.11227	8.0678e-20	7.33353e-19	2026.13	1982.73	2070.67	1273.5	1421.12	1372.66
1837	BTBD3	1830.4	-0.644888	0.0707808	-9.11106	8.15797e-20	7.41145e-19	2200.34	2450.95	2046.84	1424.85	1389.2	1470.21
1838	IGF2BP1	16393.6	0.469712	0.0515672	9.10873	8.33554e-20	7.56865e-19	14185.9	13657.4	13400.8	19837.3	19433.9	17846.5
1839	AIFM2	1143.27	0.644176	0.0707341	9.10701	8.46842e-20	7.68512e-19	900.724	887.924	887.724	1439.78	1441.06	1302.41
1840	FBXL16	236.983	1.18139	0.129769	9.10377	8.72505e-20	7.91372e-19	155.4	133.634	146.055	337.543	337.079	312.189
1841	ANK3	885.554	-0.822487	0.0903727	-9.10105	8.94608e-20	8.10979e-19	1149.17	1248.24	996.488	640.236	592.381	686.816
1842	CANX	23534.3	0.447925	0.0492342	9.09784	9.21423e-20	8.34833e-19	19734.8	20824.1	19170.5	27140.8	26160.5	28175
1843	NFKB2	1714.98	0.67366	0.0740651	9.09552	9.41391e-20	8.52462e-19	1297.64	1211.61	1456.41	2113.87	2228.91	1981.42
1844	ERLIN1	2147.22	0.509438	0.056028	9.09256	9.67367e-20	8.75509e-19	1720.28	1796.63	1799.27	2522.11	2525.1	2519.95
1845	RAP1GAP2	1312.92	0.629677	0.0693108	9.08483	1.03863e-19	9.39492e-19	1058.1	977.013	1057.6	1688.71	1549.76	1546.31
1846	ZNF578	188.687	-1.32068	0.145378	-9.08447	1.04209e-19	9.42118e-19	272.197	277.167	258.963	118.488	109.7	95.6078
1847	PUS7	592.914	0.810555	0.08923	9.08388	1.04769e-19	9.46665e-19	458.28	440.497	392.587	745.78	779.868	740.473
1848	LBH	1034.32	0.715923	0.0788314	9.0817	1.06896e-19	9.65364e-19	767.1	735.482	846.29	1383.03	1252.58	1221.44
1849	PRMT2	1411.78	-0.62128	0.0684114	-9.08153	1.07058e-19	9.66303e-19	1696.53	1688.74	1748.52	1136.09	1025.2	1175.59
1850	ANKRD27	1325.85	0.598052	0.0658556	9.08125	1.07331e-19	9.68246e-19	1040.29	1101.74	1022.38	1600.09	1635.53	1555.09
1851	ACTN1	6311.74	0.471275	0.0519027	9.07998	1.08593e-19	9.79093e-19	5276.66	5090.96	5502.44	7380.13	7584.27	7035.96
1852	THOC6	1773.62	0.565405	0.0622722	9.07958	1.08993e-19	9.8217e-19	1438.19	1365.05	1488.52	2043.18	2179.04	2127.76
1853	SLC36A1	800.376	-0.712715	0.0785116	-9.07783	1.10761e-19	9.97563e-19	1001.68	995.821	985.094	603.395	569.444	646.816
1854	WDR4	462.352	0.956895	0.105435	9.07572	1.12933e-19	1.01658e-18	326.636	282.116	334.58	655.171	629.28	546.331
1855	MZF1	472.268	-0.963625	0.106183	-9.07515	1.13519e-19	1.02131e-18	599.823	572.151	701.271	322.607	346.054	291.701
1856	ZDHHC9	2534.79	0.51614	0.0568884	9.07284	1.15949e-19	1.04261e-18	2065.73	2083.7	2108.99	2912.42	3138.42	2899.45
1857	TANGO6	736.209	0.727983	0.0802924	9.06665	1.22734e-19	1.10302e-18	543.404	564.232	555.216	905.092	968.353	880.958
1858	JAG2	1052.19	0.654073	0.0721472	9.06581	1.23684e-19	1.11096e-18	834.407	789.925	828.681	1283.46	1352.3	1224.37
1859	SH3PXD2A	7073.21	-0.469428	0.0517854	-9.06486	1.2476e-19	1.12002e-18	8505.41	8201.17	7934.62	6223.13	5857.99	5716.96
1860	VPS13B	526.888	-0.92204	0.101739	-9.06284	1.27097e-19	1.14039e-18	693.854	769.138	605.973	381.353	350.043	360.968
1861	SELENOM	3462.32	0.65993	0.0728304	9.06118	1.29047e-19	1.15726e-18	2554.69	2504.4	2993.61	3935.01	4579.48	4206.75
1862	PPM1G	7622.33	0.543493	0.059991	9.05958	1.30955e-19	1.17375e-18	6179.36	5777.94	6653.27	9005.12	9540.92	8577.39
1863	RXYLT1	599.597	0.785396	0.0867146	9.05725	1.33782e-19	1.19844e-18	438.484	420.7	461.989	780.629	727.013	768.765
1864	GYG2	923.715	-0.649248	0.0717337	-9.05081	1.41907e-19	1.27054e-18	1141.25	1102.73	1140.47	723.874	711.056	722.912
1865	AP3M2	1321.52	0.607097	0.0671249	9.0443	1.50632e-19	1.34793e-18	1049.19	1081.94	1010.99	1670.79	1578.68	1537.53
1866	LHX6	628.945	0.808732	0.0894827	9.03786	1.59775e-19	1.42896e-18	493.913	423.669	453.703	812.492	837.71	752.18
1867	LSS	2113.78	-0.594205	0.0657467	-9.0378	1.59857e-19	1.42896e-18	2591.31	2350.97	2687	1762.39	1675.42	1615.58
1868	ZFYVE16	848.873	-0.758916	0.0839781	-9.03707	1.60921e-19	1.4377e-18	1077.9	1140.34	983.022	647.206	579.416	665.353
1869	PRDX4	13179.9	0.504991	0.055887	9.03592	1.62626e-19	1.45215e-18	10360.3	10543.2	11786.9	14870.8	15786.8	15731.4
1870	ALDH7A1	3247.28	-0.486013	0.0538187	-9.03056	1.70794e-19	1.52427e-18	3709.79	3725.91	3932.09	2620.68	2768.43	2726.77
1871	KAT2B	584.886	-0.915565	0.101392	-9.02997	1.71719e-19	1.53171e-18	783.927	818.632	690.912	400.272	358.021	457.552
1872	C11orf58	5964.87	0.471268	0.0522047	9.0273	1.7596e-19	1.56869e-18	4791.65	5271.12	4934.79	6789.68	6878.2	7123.76
1873	EFEMP2	2485.63	-0.593627	0.0657739	-9.02527	1.79259e-19	1.59726e-18	3025.84	2757.81	3186.28	2016.29	2056.38	1871.18
1874	ZNF266	1033.09	-0.622567	0.0689835	-9.02487	1.79905e-19	1.60216e-18	1271.9	1228.44	1257.52	808.509	807.792	824.374
1875	KCND1	404.851	-0.904033	0.100179	-9.02418	1.81048e-19	1.61147e-18	528.557	509.789	544.857	289.749	272.256	283.897
1876	CNTN1	225.587	-1.36531	0.151334	-9.02189	1.84867e-19	1.64371e-18	356.33	350.418	268.285	122.471	108.703	147.314
1877	ZFPL1	2510.34	0.540644	0.0599257	9.02191	1.8484e-19	1.64371e-18	2080.57	1901.56	2154.57	2977.15	3007.78	2940.43
1878	FUT1	252.876	1.13273	0.125571	9.02059	1.87075e-19	1.66246e-18	167.277	150.462	157.449	369.405	336.081	336.579
1879	JPT1	4337.7	0.569538	0.0631598	9.01742	1.92575e-19	1.71042e-18	3407.9	3292.35	3777.75	4968.55	5533.87	5045.75
1880	SPX	132.81	1.61738	0.179411	9.01493	1.96993e-19	1.74873e-18	62.3578	68.3018	65.2586	178.23	192.474	230.239
1881	CORO2B	626.13	0.835329	0.0927113	9.01	2.06061e-19	1.82826e-18	448.382	455.345	445.416	765.694	898.544	743.4
1882	HOMEZ	539.303	-0.810082	0.0899131	-9.00961	2.06796e-19	1.8338e-18	667.13	707.765	685.733	404.255	368.991	401.943
1883	EEF1A2	16505.2	0.505724	0.0561349	9.00909	2.07779e-19	1.84154e-18	13822.6	12904.1	14198.4	19054.7	20716.4	18335.2
1884	IQSEC3	110.675	-1.77228	0.196746	-9.00796	2.0993e-19	1.85918e-18	186.084	149.472	178.166	54.7635	42.8828	52.6819
1885	PPP3R1	2094.13	0.578732	0.064247	9.00793	2.09992e-19	1.85918e-18	1617.34	1781.79	1639.75	2369.77	2520.11	2636.04
1886	ELAVL1	6665.12	0.478405	0.0531697	8.9977	2.30498e-19	2.03965e-18	5827.98	5324.57	5557.34	7888.94	7986.17	7405.71
1887	TPD52	1636.14	0.588607	0.0654295	8.99605	2.33983e-19	2.06939e-18	1245.18	1381.87	1293.78	1923.69	1915.76	2056.54
1888	SNX9	1910.42	0.542423	0.0603058	8.99455	2.37195e-19	2.09669e-18	1513.41	1636.27	1516.49	2260.24	2224.92	2311.17
1889	SETD3	1499.91	0.572945	0.0637032	8.99398	2.38445e-19	2.10662e-18	1244.19	1227.45	1145.65	1824.12	1798.09	1759.96
1890	TECPR2	747.662	-0.716116	0.0796311	-8.99292	2.40753e-19	2.12588e-18	926.459	900.792	961.269	571.532	587.394	538.526
1891	DLG4	1476.59	0.581664	0.0647102	8.98874	2.50071e-19	2.207e-18	1195.69	1173.01	1179.83	1853	1775.15	1682.89
1892	TMEM59L	753.785	0.729651	0.081187	8.98728	2.53417e-19	2.23535e-18	567.159	583.04	551.073	877.212	981.318	962.908
1893	AHR	611.636	0.808492	0.0899612	8.98712	2.53783e-19	2.23621e-18	453.331	476.133	403.982	740.801	784.855	810.716
1894	PGAP1	647.796	-0.932322	0.103739	-8.98715	2.53715e-19	2.23621e-18	885.877	947.316	716.809	482.915	413.869	439.991
1895	COL24A1	249.247	-1.14861	0.127855	-8.98368	2.61869e-19	2.30624e-18	368.208	348.438	313.863	148.359	158.567	158.046
1896	SRPX2	155.82	1.44428	0.160782	8.98283	2.63885e-19	2.32277e-18	71.2661	94.0387	85.9756	229.011	224.387	230.239
1897	RXRA	5232.45	-0.49877	0.055535	-8.98118	2.67869e-19	2.3566e-18	6281.31	5895.73	6206.82	4525.46	4427.9	4057.48
1898	SYNCRIP	3953.17	0.500469	0.0557259	8.98091	2.68539e-19	2.36124e-18	3264.38	3431.92	3126.2	4639.97	4449.84	4806.73
1899	CCDC117	2764.38	-0.491079	0.0546895	-8.9794	2.72257e-19	2.39267e-18	3206.97	3331.94	3152.09	2323.97	2228.91	2342.39
1900	EXOSC7	570.83	0.796076	0.0886827	8.97668	2.7905e-19	2.45108e-18	389.984	422.679	439.201	715.909	747.956	709.254
1901	CCNL1	715.678	-0.72577	0.0809002	-8.97118	2.93364e-19	2.57546e-18	852.223	898.812	925.015	559.584	534.539	523.892
1902	PLEKHF1	296.92	1.06641	0.118873	8.97097	2.93905e-19	2.57885e-18	185.094	198.966	191.632	400.272	435.809	369.749
1903	INCENP	3983.9	-0.451994	0.0503998	-8.96818	3.01452e-19	2.64368e-18	4530.34	4539.6	4739.02	3429.19	3365.8	3299.45
1904	SH3RF2	264.617	1.16994	0.130464	8.96753	3.03246e-19	2.65802e-18	165.298	155.411	167.808	359.448	414.866	324.872
1905	ZNF510	559.341	-0.850453	0.0948663	-8.96475	3.10979e-19	2.72437e-18	718.6	748.35	691.948	380.358	368.991	447.796
1906	GTF2IRD1	1836.61	0.549032	0.0612572	8.96272	3.16764e-19	2.77359e-18	1435.22	1474.92	1564.13	2223.4	2204.97	2117.03
1907	KLHL42	1427.32	-0.595359	0.0664717	-8.95658	3.34903e-19	2.93088e-18	1713.36	1793.67	1645.97	1164.97	1083.04	1162.9
1908	SLC19A2	512.585	0.834656	0.0931978	8.95574	3.37461e-19	2.95173e-18	371.177	372.195	361.512	609.369	687.122	674.133
1909	ATP6V0D1	1854.78	-0.566483	0.0632598	-8.95485	3.40183e-19	2.97398e-18	2164.71	2179.72	2298.55	1476.62	1585.67	1423.39
1910	USP39	3486.25	0.470221	0.0525214	8.95293	3.46158e-19	3.02463e-18	2850.64	2869.67	3049.54	3985.79	4086.83	4075.04
1911	LAP3	1072.38	0.631681	0.0705761	8.95035	3.54371e-19	3.09476e-18	853.213	826.551	844.218	1334.24	1235.62	1340.46
1912	TUBGCP6	1659.79	-0.664093	0.0742305	-8.94637	3.67359e-19	3.20652e-18	2047.91	1865.93	2191.86	1334.24	1338.34	1180.46
1913	TRMT6	522.064	0.803895	0.0899171	8.94041	3.87744e-19	3.38267e-18	383.055	394.963	362.548	670.107	663.187	658.523
1914	NID2	1383.62	-0.584398	0.0653924	-8.93678	4.00663e-19	3.49355e-18	1653.97	1649.14	1677.04	1163.97	1103.98	1053.64
1915	ARRDC3	404.256	0.914105	0.102318	8.934	4.10869e-19	3.58068e-18	269.227	291.025	280.716	541.661	493.651	549.257
1916	EGR2	81.679	2.12662	0.238098	8.93172	4.19445e-19	3.65351e-18	28.7044	37.6155	24.8604	119.484	152.583	126.827
1917	PSMD7	2201.29	0.510082	0.0571265	8.929	4.29871e-19	3.74236e-18	1791.55	1815.44	1841.74	2511.16	2563.99	2683.85
1918	YWHAQ	14270.6	0.375073	0.042024	8.92522	4.44821e-19	3.8705e-18	12327.1	12372.5	12578.3	16123.4	16305.4	15916.8
1919	CRIPAK	135.945	-1.52152	0.170476	-8.92513	4.45178e-19	3.87159e-18	198.951	200.946	205.098	60.7377	75.7928	74.1449
1920	SETBP1	519.572	-0.852528	0.0955223	-8.92491	4.46056e-19	3.8772e-18	718.6	672.129	615.295	390.315	365.002	356.09
1921	GSTA4	564.425	-0.776286	0.0869983	-8.92301	4.53788e-19	3.94235e-18	720.579	699.846	717.845	412.22	402.899	433.162
1922	KMT2E	1837.62	-0.601554	0.06742	-8.92249	4.55916e-19	3.95878e-18	2288.43	2317.31	2039.59	1529.4	1404.16	1446.8
1923	HSCB	432.725	0.916596	0.102825	8.91418	4.91433e-19	4.26497e-18	274.176	326.661	298.325	533.696	565.454	598.037
1924	HLX	396.578	-0.899709	0.100939	-8.91341	4.94867e-19	4.29253e-18	522.618	515.728	510.674	285.766	283.226	261.458
1925	DHX33	1853.1	0.565367	0.0634504	8.91037	5.08607e-19	4.40943e-18	1532.22	1520.46	1430.51	2324.96	2210.96	2099.47
1926	ZNF789	161.7	-1.39711	0.156915	-8.90363	5.40481e-19	4.68332e-18	237.554	231.632	234.102	90.6088	76.7901	99.5102
1927	TMSB15B	197.553	-1.26414	0.142004	-8.90214	5.47813e-19	4.74439e-18	278.136	257.369	301.433	117.493	119.673	111.217
1928	MDH2	13885.7	0.501728	0.0563669	8.90112	5.52884e-19	4.78583e-18	11110.6	11047.1	12328.7	15877.4	17219.9	15730.4
1929	ELAC2	3240.95	0.493623	0.0554571	8.90098	5.53537e-19	4.789e-18	2694.25	2549.93	2832.02	3776.69	3759.72	3833.09
1930	BEST1	252.904	1.11108	0.124873	8.89768	5.70279e-19	4.92873e-18	156.389	167.29	156.413	361.439	350.043	325.847
1931	HOXB8	265.048	-1.1591	0.130269	-8.89771	5.70117e-19	4.92873e-18	388.004	313.792	396.731	168.273	160.561	162.924
1932	EXOSC9	900.032	0.683971	0.076884	8.89615	5.78162e-19	4.99427e-18	660.201	688.957	723.024	1070.38	1082.04	1175.59
1933	NFIB	899.691	-0.712607	0.0801641	-8.88935	6.14698e-19	5.30714e-18	1120.46	1193.8	1037.92	716.905	642.245	686.816
1934	DDX56	2414.39	0.684071	0.0769682	8.88771	6.23787e-19	5.38282e-18	1764.82	1694.68	2098.63	3000.05	3162.36	2765.8
1935	ZNF200	927.288	-0.661181	0.0743933	-8.88765	6.24174e-19	5.38338e-18	1120.46	1138.36	1149.79	724.87	674.157	756.082
1936	GPATCH2L	806.805	-0.695927	0.0783177	-8.88595	6.33797e-19	5.46355e-18	971.99	1043.33	977.843	620.322	585.4	641.938
1937	LEPROT	726.843	-0.715629	0.0805499	-8.88429	6.43299e-19	5.5426e-18	888.846	874.065	947.803	530.709	567.449	552.184
1938	BPTF	3783.19	-0.565716	0.0636793	-8.88383	6.45942e-19	5.5625e-18	4533.31	4862.3	4150.65	3155.38	2896.08	3101.4
1939	CAVIN1	5201.12	-0.525469	0.0591652	-8.88139	6.60293e-19	5.68315e-18	6325.85	5716.56	6371.52	4361.17	4422.91	4008.7
1940	SEC13	3616.83	0.563417	0.0634704	8.87684	6.8789e-19	5.91763e-18	2995.15	2649.91	3113.77	4238.7	4497.71	4205.77
1941	NKAIN1	133.298	1.60513	0.180861	8.87492	6.99807e-19	6.01704e-18	73.2457	62.3625	62.151	231.998	192.474	177.557
1942	KLHL3	224.308	-1.20367	0.135628	-8.87478	7.00732e-19	6.02189e-18	314.758	333.59	290.038	143.381	120.67	143.412
1943	CUTC	636.124	0.763192	0.0860376	8.87044	7.28542e-19	6.25766e-18	449.372	509.789	455.774	790.586	786.849	824.374
1944	PANK1	520.515	-0.847068	0.0955704	-8.86328	7.76946e-19	6.66999e-18	662.181	729.543	615.295	362.435	380.959	372.675
1945	SKAP2	1212.35	-0.633361	0.0714652	-8.86251	7.82311e-19	6.71259e-18	1443.14	1576.88	1402.54	914.053	984.31	953.152
1946	PEMT	1744.37	0.658586	0.0743261	8.86076	7.94684e-19	6.81525e-18	1278.83	1306.64	1474.02	2031.23	2332.62	2042.89
1947	PMM2	1101.19	0.6082	0.0686833	8.85514	8.35775e-19	7.16397e-18	880.928	863.177	873.222	1383.03	1302.44	1304.36
1948	POMGNT1	4246.78	0.473898	0.0535172	8.85507	8.36334e-19	7.16508e-18	3530.64	3405.19	3731.13	5030.28	4989.36	4794.05
1949	ZNF248	577.526	-0.769495	0.0869047	-8.85448	8.40767e-19	7.19936e-18	729.487	758.249	696.092	434.126	421.847	425.357
1950	HDAC6	2979.98	-0.559294	0.0631897	-8.85103	8.67116e-19	7.42118e-18	3555.38	3308.18	3788.11	2526.09	2411.41	2290.69
1951	MTFR1L	1612.7	-0.624716	0.0705881	-8.85015	8.73998e-19	7.47624e-18	1969.71	1798.61	2101.74	1216.75	1264.54	1324.85
1952	CDK4	9731.64	0.472463	0.0533914	8.84905	8.82645e-19	7.54635e-18	8146.11	7631	8680.43	11136.9	11519.5	11275.9
1953	DMXL2	637.355	-0.865013	0.0978025	-8.84449	9.19456e-19	7.85704e-18	851.234	882.974	734.418	455.035	403.896	496.575
1954	VAT1	10308.8	0.465291	0.0526261	8.84146	9.44795e-19	8.06944e-18	8881.53	8073.47	9027.44	12075.9	12145.8	11648.5
1955	PDIA6	7099.81	0.405126	0.0458616	8.83366	1.01302e-18	8.64775e-18	6064.54	6031.35	6232.71	8037.3	8260.42	7972.52
1956	PDE3B	621.649	-0.794859	0.0899973	-8.83203	1.02789e-18	8.77016e-18	808.672	840.409	716.809	443.087	446.779	474.137
1957	ITPK1	2088.02	0.508229	0.0575589	8.82973	1.04925e-18	8.94782e-18	1745.03	1660.03	1767.16	2497.22	2434.35	2424.34
1958	DTNBP1	854.447	0.721073	0.0816703	8.82907	1.05546e-18	8.9962e-18	631.497	614.716	689.877	1007.65	1146.87	1036.08
1959	ZBTB5	883.643	-0.701607	0.0795073	-8.82443	1.10021e-18	9.37288e-18	1132.34	1060.16	1090.75	700.973	610.332	707.303
1960	BCAS4	973.184	0.631368	0.071549	8.82427	1.10178e-18	9.38141e-18	788.876	740.431	761.35	1166.96	1214.68	1166.81
1961	LOXL4	1474	-0.581769	0.0659287	-8.82421	1.10235e-18	9.38147e-18	1758.89	1687.75	1855.21	1206.79	1201.72	1133.64
1962	HPS6	1104.35	-0.612802	0.0694539	-8.82314	1.11292e-18	9.46182e-18	1325.35	1338.32	1342.46	910.071	882.588	827.301
1963	SYTL5	403.778	1.01705	0.11527	8.82317	1.11264e-18	9.46182e-18	246.462	303.894	250.676	601.403	482.681	537.55
1964	ZFYVE26	690.881	-0.770352	0.0873226	-8.8219	1.1253e-18	9.56218e-18	837.376	927.519	848.362	532.7	463.732	535.599
1965	PARD6G	1259.94	-0.583698	0.0661922	-8.81823	1.16286e-18	9.8763e-18	1486.69	1487.79	1559.99	974.791	1017.22	1033.15
1966	PRAP1	73.0629	-2.1591	0.244905	-8.81608	1.18537e-18	1.00624e-17	118.777	108.887	130.517	25.8882	29.9182	24.3898
1967	RHBDF2	824.338	0.784506	0.0890073	8.81396	1.20805e-18	1.02497e-17	544.394	583.04	689.877	1049.47	1089.02	990.224
1968	GRPEL2	574.88	0.76952	0.0873608	8.80853	1.26799e-18	1.07528e-17	437.494	431.588	406.053	711.926	709.062	753.156
1969	ENC1	896.211	0.653546	0.0742007	8.80782	1.27608e-18	1.08159e-17	684.946	705.785	699.199	1126.14	1044.15	1117.05
1970	RCC2	8235.72	0.460508	0.0523051	8.80426	1.31719e-18	1.11587e-17	6923.7	6751.98	7121.47	9649.34	9980.72	8987.14
1971	NSFL1C	3399.67	0.494024	0.0561135	8.80401	1.32012e-18	1.11778e-17	2825.9	2679.61	2964.6	4085.36	3983.11	3859.44
1972	DLAT	1740.84	0.571043	0.0648964	8.7993	1.37676e-18	1.16515e-17	1442.15	1446.22	1313.46	2069.07	2001.53	2172.64
1973	PNPLA2	5853.08	0.501692	0.0570525	8.79351	1.44962e-18	1.22619e-17	4921.32	4482.18	5133.68	6729.94	7086.63	6764.74
1974	TRIM65	2144.59	0.611681	0.0696045	8.78796	1.52306e-18	1.28765e-17	1644.07	1578.86	1867.64	2635.62	2691.64	2449.71
1975	TNS1	871	-0.679054	0.0773199	-8.7824	1.60023e-18	1.35221e-17	1122.44	1032.45	1061.75	677.077	701.084	631.207
1976	TNXB	159.033	1.44537	0.164623	8.7799	1.63618e-18	1.38189e-17	89.0826	80.1804	87.0115	269.835	215.411	212.679
1977	GRWD1	1701.35	0.586315	0.0667897	8.77853	1.65629e-18	1.39817e-17	1327.33	1299.71	1454.33	2052.14	2133.17	1941.42
1978	PLA2G6	436.423	-1.03619	0.118059	-8.77688	1.68069e-18	1.41805e-17	648.323	504.84	607.009	262.865	332.092	263.409
1979	EEF2KMT	528.273	0.835987	0.0952529	8.7765	1.68639e-18	1.42214e-17	389.984	347.448	400.874	634.261	719.035	678.035
1980	INTS13	1029.13	0.683046	0.0778311	8.77601	1.69381e-18	1.42768e-17	819.56	816.652	733.382	1229.69	1208.7	1366.8
1981	ATG12	1329.42	0.672859	0.0766972	8.77293	1.74082e-18	1.46656e-17	999.705	1063.13	1012.03	1519.44	1563.73	1818.5
1982	NRBP2	919.638	-0.651253	0.074258	-8.77013	1.78456e-18	1.50265e-17	1111.55	1077.98	1181.91	726.862	720.032	699.498
1983	MICAL1	984.932	-0.676247	0.0771768	-8.76232	1.9128e-18	1.60982e-17	1199.65	1134.4	1301.03	772.664	781.863	719.986
1984	RGL1	464.405	-0.854373	0.0975092	-8.76196	1.91876e-18	1.61402e-17	596.853	632.534	564.539	314.641	351.04	326.823
1985	PABPC4	9434.07	0.440848	0.0503223	8.76048	1.94429e-18	1.63467e-17	8166.89	7855.7	7988.48	10976.6	11335	10281.7
1986	UHRF1BP1	2989.74	0.535219	0.0611455	8.75321	2.07372e-18	1.74261e-17	2500.25	2580.62	2242.62	3637.3	3464.53	3513.1
1987	PARP16	1364.31	0.602394	0.0688306	8.75183	2.09915e-18	1.7631e-17	1127.39	1004.73	1118.72	1618.01	1706.34	1610.7
1988	UNC93B1	1445.34	0.567407	0.0648564	8.74868	2.15872e-18	1.81222e-17	1185.79	1096.79	1211.95	1715.59	1728.28	1733.62
1989	SRSF5	2191.31	-0.506743	0.0579352	-8.74673	2.1963e-18	1.84284e-17	2569.54	2466.78	2680.78	1817.15	1795.09	1818.5
1990	B4GALT1	4831.64	0.4274	0.0488726	8.74518	2.22651e-18	1.86724e-17	4054.25	4157.5	4151.69	5456.44	5718.37	5451.6
1991	TSC1	1797.98	-0.535168	0.0612348	-8.7396	2.3394e-18	1.96094e-17	2158.77	2170.81	2053.06	1504.5	1495.91	1404.85
1992	MTDH	4335.01	0.570748	0.0653122	8.73877	2.35652e-18	1.9743e-17	3464.32	3829.85	3170.74	5140.8	5011.3	5393.06
1993	ENDOD1	1707.27	0.56803	0.0650067	8.73802	2.37229e-18	1.98651e-17	1344.16	1456.12	1325.89	2016.29	1963.63	2137.52
1994	GABARAPL1	2427.16	0.502461	0.0575174	8.7358	2.41933e-18	2.02489e-17	2043.95	1928.29	2054.09	2955.24	2782.39	2798.97
1995	TBC1D2B	2630.31	-0.500612	0.0573141	-8.73453	2.44672e-18	2.04678e-17	3118.88	3004.29	3123.09	2193.53	2274.78	2067.28
1996	CA12	827.353	0.655691	0.0750761	8.73368	2.46516e-18	2.06118e-17	652.282	618.676	656.729	1018.6	1001.26	1016.57
1997	ZBTB46	760.499	-0.714332	0.0817932	-8.73338	2.47165e-18	2.06557e-17	993.766	880.005	961.269	599.412	573.433	555.111
1998	SNX12	1741.93	-0.539089	0.0617401	-8.7316	2.51105e-18	2.09744e-17	2114.23	1996.59	2079.99	1464.68	1438.07	1358.02
1999	PUF60	3953.47	0.565212	0.0647757	8.72567	2.64601e-18	2.20907e-17	3143.63	2965.68	3457.67	4632	5029.25	4492.59
[truncated: 17,306 more rows]
